# Supplementary material
Source: PubMed Central journal article supplement (PMC3458512)
Supplement: NIHMS401609-supplement-supplement_1.pdf [file NIHMS401609-supplement-supplement_1.pdf]

## Electronic Supplementary Information

Design, Synthesis and Biological evaluation of 1-(Fluoroalkylidene)-1,1-bisphosphonic Acids against *Trypanosoma cruzi*

Sergio H. Szajnman,<sup>a</sup> Valeria S. Rosso,<sup>a,b</sup> Leena Malayil,<sup>b</sup> Alyssa Smith,<sup>b</sup> Silvia N. J. Moreno,<sup>b</sup> Roberto Docampo,<sup>b</sup> and Juan B. Rodriguez<sup>a,\*</sup>

<sup>a</sup>*Departamento de Química Orgánica and UMYMFOR (CONICET–FCEyN), Facultad de Ciencias Exactas y Naturales, Universidad de Buenos Aires, Pabellón 2, Ciudad Universitaria, C1428EHA, Buenos Aires, Argentina,* <sup>b</sup>*Center for Tropical and Emerging Global Diseases and Department of Cellular Biology, University of Georgia, Athens, Georgia, 30602, USA*

## List of Contents

|                                                    |         |
|----------------------------------------------------|---------|
| <sup>1</sup> H NMR spectrum of compound <b>14</b>  | Page 3  |
| <sup>13</sup> C NMR spectrum of compound <b>14</b> | Page 3  |
| <sup>31</sup> P NMR spectrum of compound <b>14</b> | Page 4  |
| <sup>1</sup> H NMR spectrum of compound <b>35</b>  | Page 4  |
| <sup>13</sup> C NMR spectrum of compound <b>35</b> | Page 5  |
| <sup>31</sup> P NMR spectrum of compound <b>35</b> | Page 5  |
| <sup>1</sup> H NMR spectrum of compound <b>26</b>  | Page 6  |
| <sup>13</sup> C NMR spectrum of compound <b>26</b> | Page 6  |
| <sup>31</sup> P NMR spectrum of compound <b>26</b> | Page 7  |
| <sup>1</sup> H NMR spectrum of compound <b>36</b>  | Page 7  |
| <sup>13</sup> C NMR spectrum of compound <b>36</b> | Page 8  |
| <sup>31</sup> P NMR spectrum of compound <b>36</b> | Page 8  |
| <sup>1</sup> H NMR spectrum of compound <b>27</b>  | Page 9  |
| <sup>13</sup> C NMR spectrum of compound <b>27</b> | Page 9  |
| <sup>31</sup> P NMR spectrum of compound <b>27</b> | Page 10 |
| <sup>1</sup> H NMR spectrum of compound <b>37</b>  | Page 10 |
| <sup>13</sup> C NMR spectrum of compound <b>37</b> | Page 11 |
| <sup>31</sup> P NMR spectrum of compound <b>37</b> | Page 11 |
| <sup>1</sup> H NMR spectrum of compound <b>28</b>  | Page 12 |
| <sup>13</sup> C NMR spectrum of compound <b>28</b> | Page 12 |
| <sup>31</sup> P NMR spectrum of compound <b>28</b> | Page 13 |
| <sup>1</sup> H NMR spectrum of compound <b>38</b>  | Page 13 |
| <sup>13</sup> C NMR spectrum of compound <b>38</b> | Page 14 |
| <sup>31</sup> P NMR spectrum of compound <b>38</b> | Page 14 |
| <sup>1</sup> H NMR spectrum of compound <b>29</b>  | Page 15 |
| <sup>13</sup> C NMR spectrum of compound <b>29</b> | Page 15 |
| <sup>31</sup> P NMR spectrum of compound <b>29</b> | Page 16 |
| <sup>1</sup> H NMR spectrum of compound <b>39</b>  | Page 16 |
| <sup>13</sup> C NMR spectrum of compound <b>39</b> | Page 17 |
| <sup>1</sup> H NMR spectrum of compound <b>30</b>  | Page 17 |

|                                                       |         |
|-------------------------------------------------------|---------|
| <sup>13</sup> C NMR spectrum of compound <b>30</b>    | Page 18 |
| <sup>31</sup> P NMR spectrum of compound <b>30</b>    | Page 18 |
| <sup>1</sup> H NMR spectrum of compound <b>40</b>     | Page 19 |
| <sup>13</sup> C NMR spectrum of compound <b>40</b>    | Page 19 |
| <sup>1</sup> H NMR spectrum of compound <b>31</b>     | Page 20 |
| <sup>13</sup> C NMR spectrum of compound <b>31</b>    | Page 20 |
| <sup>31</sup> P NMR spectrum of compound <b>31</b>    | Page 21 |
| <sup>1</sup> H NMR spectrum of compound <b>41</b>     | Page 21 |
| <sup>13</sup> C NMR spectrum of compound <b>41</b>    | Page 22 |
| <sup>31</sup> P NMR spectrum of compound <b>41</b>    | Page 22 |
| <sup>1</sup> H NMR spectrum of compound <b>32</b>     | Page 23 |
| <sup>13</sup> C NMR spectrum of compound <b>32</b>    | Page 23 |
| <sup>31</sup> P NMR spectrum of compound <b>32</b>    | Page 24 |
| <sup>1</sup> H NMR spectrum of compound <b>42</b>     | Page 24 |
| <sup>13</sup> C NMR spectrum of compound <b>42</b>    | Page 25 |
| <sup>31</sup> P NMR spectrum of compound <b>42</b>    | Page 25 |
| <sup>1</sup> H NMR spectrum of compound <b>33</b>     | Page 26 |
| <sup>13</sup> C NMR spectrum of compound <b>33</b>    | Page 26 |
| <sup>31</sup> P NMR spectrum of compound <b>33</b>    | Page 27 |
| <sup>1</sup> H NMR spectrum of compound <b>43</b>     | Page 27 |
| <sup>13</sup> C NMR spectrum of compound <b>43</b>    | Page 28 |
| <sup>31</sup> P NMR spectrum of compound <b>43</b>    | Page 28 |
| <sup>1</sup> H NMR spectrum of compound <b>34</b>     | Page 29 |
| <sup>13</sup> C NMR spectrum of compound <b>34</b>    | Page 29 |
| <sup>31</sup> P NMR spectrum of compound <b>34</b>    | Page 30 |
| <sup>1</sup> H NMR spectrum of compound <b>44</b>     | Page 30 |
| <sup>13</sup> C NMR spectrum of compound <b>44</b>    | Page 31 |
| <sup>31</sup> P NMR spectrum of compound <b>44</b>    | Page 31 |
| <sup>1</sup> H NMR spectrum of compound <b>16</b>     | Page 32 |
| <sup>13</sup> C NMR spectrum of compound <b>16</b>    | Page 32 |
| <sup>31</sup> P NMR spectrum of compound <b>16</b>    | Page 33 |
| <sup>1</sup> H NMR spectrum of compound <b>17</b>     | Page 33 |
| <sup>13</sup> C NMR spectrum of compound <b>17</b>    | Page 34 |
| <sup>31</sup> P NMR spectrum of compound <b>17</b>    | Page 34 |
| <sup>1</sup> H NMR spectrum of compound <b>18</b>     | Page 35 |
| <sup>13</sup> C NMR spectrum of compound <b>18</b>    | Page 35 |
| <sup>1</sup> H NMR spectrum of compound <b>19</b>     | Page 36 |
| <sup>13</sup> C NMR spectrum of compound <b>19</b>    | Page 36 |
| <sup>1</sup> H NMR spectrum of compound <b>20</b>     | Page 37 |
| <sup>13</sup> C NMR spectrum of compound <b>20</b>    | Page 37 |
| <sup>31</sup> P NMR spectrum of compound <b>20</b>    | Page 38 |
| <sup>1</sup> H NMR spectrum of compound <b>21</b>     | Page 38 |
| <sup>13</sup> C NMR spectrum of compound <b>21</b>    | Page 39 |
| <sup>1</sup> H NMR spectrum of compound <b>22</b>     | Page 39 |
| <sup>13</sup> C NMR spectrum of compound <b>22</b>    | Page 40 |
| <sup>31</sup> P NMR spectrum of compound <b>22</b>    | Page 40 |
| <sup>1</sup> H NMR spectrum of compound <b>23</b>     | Page 41 |
| <sup>13</sup> C NMR spectrum of compound <b>23</b>    | Page 41 |
| <sup>1</sup> H NMR spectrum of compound <b>24</b>     | Page 42 |
| <sup>13</sup> C NMR spectrum of compound <b>24</b>    | Page 42 |
| Copy of the Elemental Analysis for compound <b>21</b> | Page 43 |
| Copy of the Elemental Analysis for compound <b>22</b> | Page 43 |
| Copy of the Elemental Analysis for compound <b>23</b> | Page 43 |

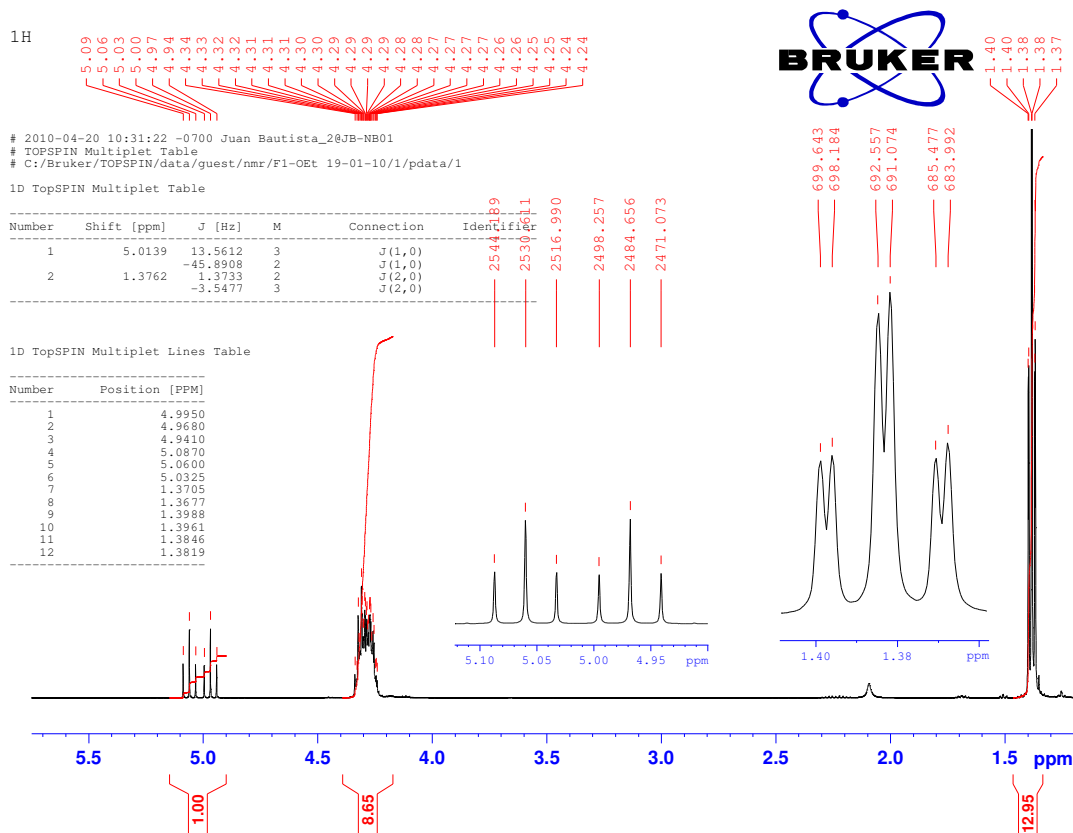<sup>1</sup>H NMR spectrum of compound 14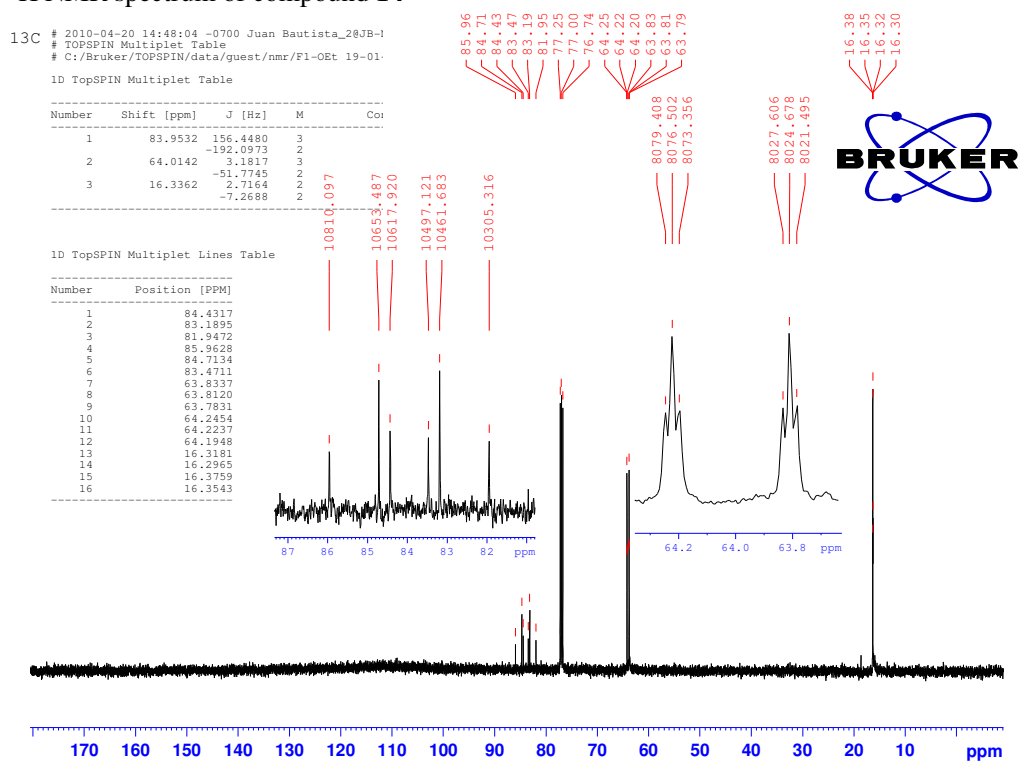<sup>13</sup>C NMR spectrum of compound 14

## 31P F1-(OEt)3

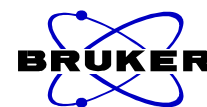

# 2010-06-01 16:49:01 -0700 Juan Bautista\_2@JB-NB01  
# TOPSPIN Multiplet Table  
# C:/Bruker/TOPSPIN/data/guest/nmr/F1-OEt 19-01-10/3/pdata/1

1D TopSPIN Multiplet Table

| Number | Shift [ppm] | J [Hz]  | M | Connection | Identifier |
|--------|-------------|---------|---|------------|------------|
| 1      | 11.1486     | 63.5713 | 2 |            | J(1,0)     |

1D TopSPIN Multiplet Lines Table

| Number | Position [PPM] |
|--------|----------------|
| 1      | 11.3056        |
| 2      | 10.9916        |

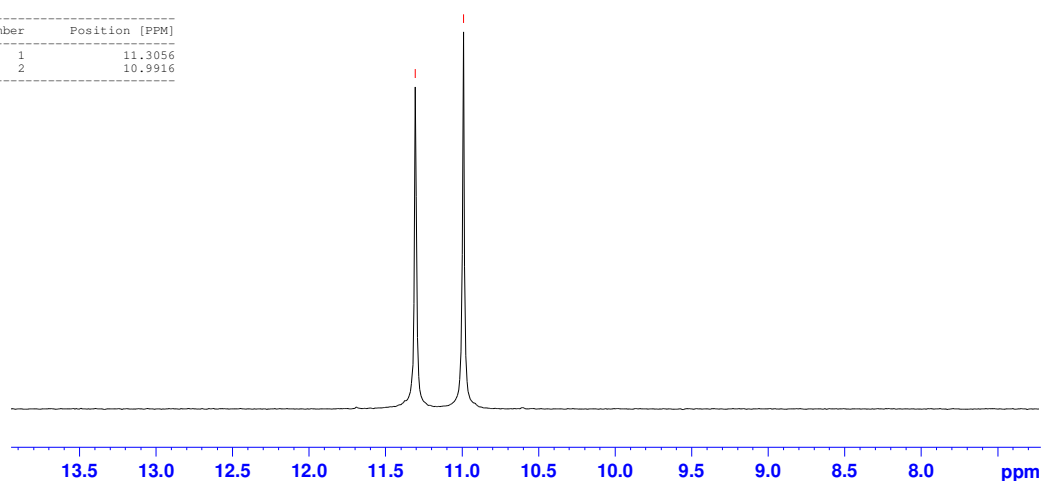<sup>31</sup>P NMR spectrum of compound 14

PMA120-1H

# 2009-09-15 10:22:20 -0300 Juan Bautista@jb-pc01  
# TOPSPIN Multiplet Table  
# C:/Bruker/TOPSPIN/data/guest/nmr/PMA120/1/pdata/1

1D TopSPIN Multiplet Table

| Number | Shift [ppm] | J [Hz]  | M | Connection | Identifier |
|--------|-------------|---------|---|------------|------------|
| 1      | 4.7774      | 45.0617 | 2 |            | J(1,0)     |

1D TopSPIN Multiplet Lines Table

| Number | Position [PPM] |
|--------|----------------|
| 1      | 4.8224         |
| 2      | 4.7323         |

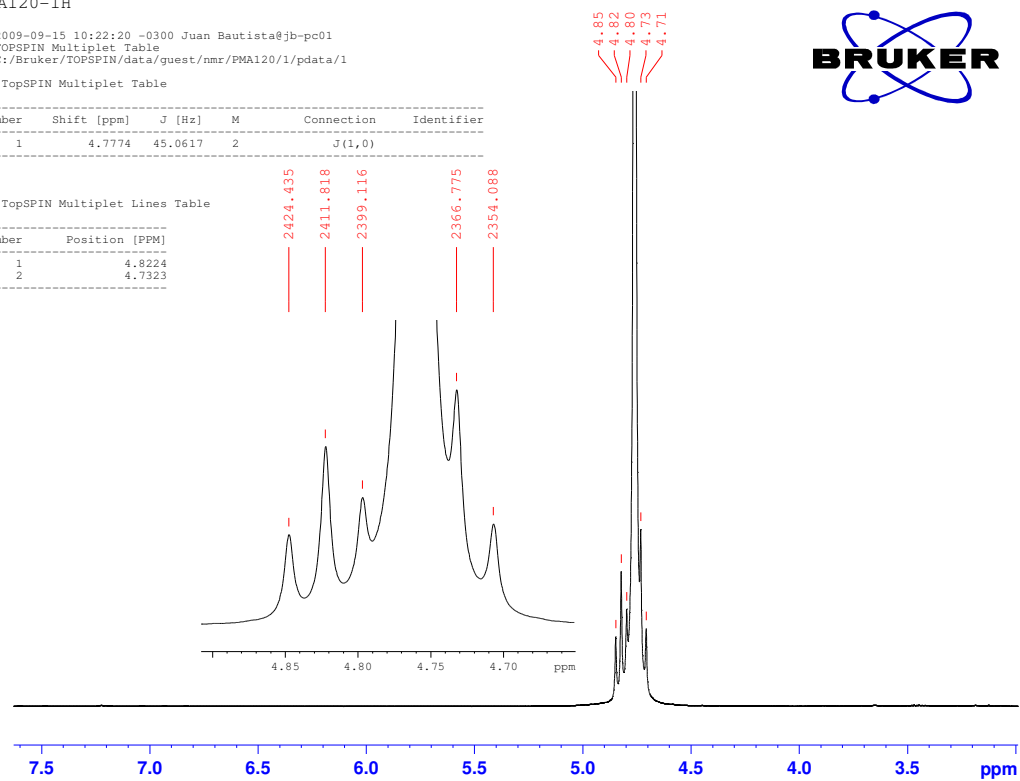<sup>1</sup>H NMR spectrum of compound 35

|                        |                    |                  |                      |                       |                                    |
|------------------------|--------------------|------------------|----------------------|-----------------------|------------------------------------|
| Acquisition Time (sec) | 0.7447             | Date             | 02 Jun 2010 14:54:00 | File Name             | C:\Documents\RMN\PMA120C(dmsd).hnt |
| Frequency (MHz)        | 50.33              | Nucleus          | <sup>13</sup> C      | Number of Transients  | 16960                              |
| Solvent                | Cl <sub>3</sub> CD | Sweep Width (Hz) | 11000.00             | Original Points Count | 8192                               |
|                        |                    |                  |                      | Points Count          | 32768                              |

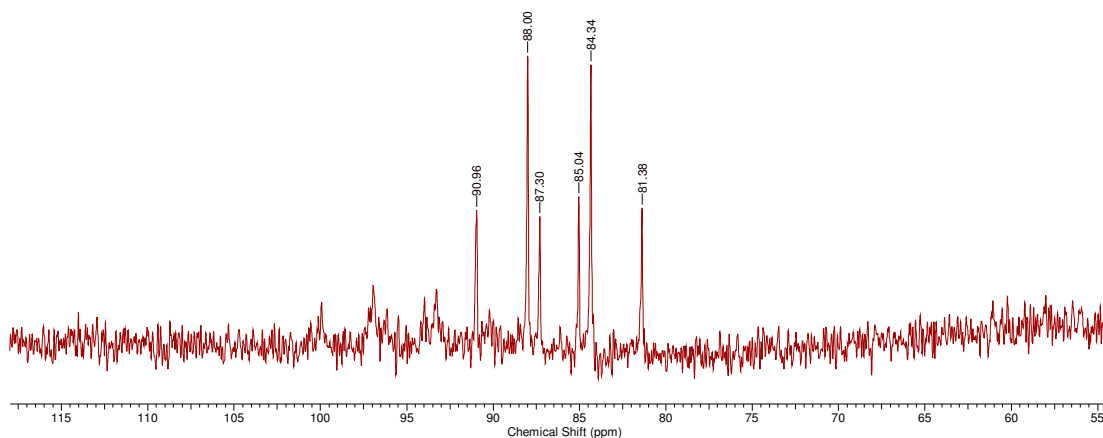

| No. | (ppm) | (Hz)   | Height |
|-----|-------|--------|--------|
| 1   | 81.38 | 4095.5 | 0.0116 |
| 2   | 84.34 | 4244.6 | 0.0240 |
| 3   | 85.04 | 4279.8 | 0.0126 |
| 4   | 87.30 | 4393.6 | 0.0108 |
| 5   | 88.00 | 4428.9 | 0.0248 |
| 6   | 90.96 | 4577.9 | 0.0114 |

### <sup>13</sup>C NMR spectrum of compound 35

PMA120-P31

# 2008-05-21 17:30:14 -0300 Juan Bautista@jb-pc01  
 # TOPSPIN Multiplet Table  
 # C:/Bruker/TOPSPIN/data/guest/nmr/PMA120/3/pdata/1

1D TopSPIN Multiplet Table

| Number | Shift [ppm] | J [Hz]  | M | Connection | Identif |
|--------|-------------|---------|---|------------|---------|
| 1      | 10.0587     | 62.1962 | 2 | J(1,0)     |         |

1D TopSPIN Multiplet Lines Table

| Number | Position [PPM] |
|--------|----------------|
| 1      | 10.2123        |
| 2      | 9.9051         |

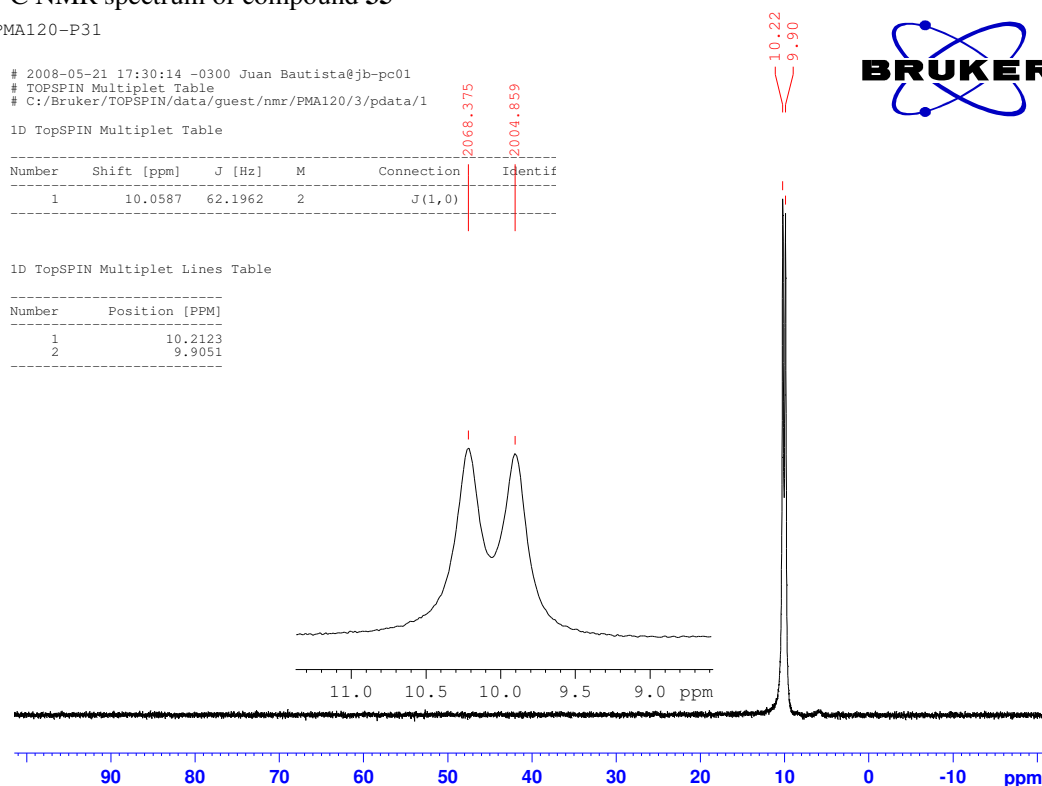

### <sup>31</sup>P NMR spectrum of compound 35

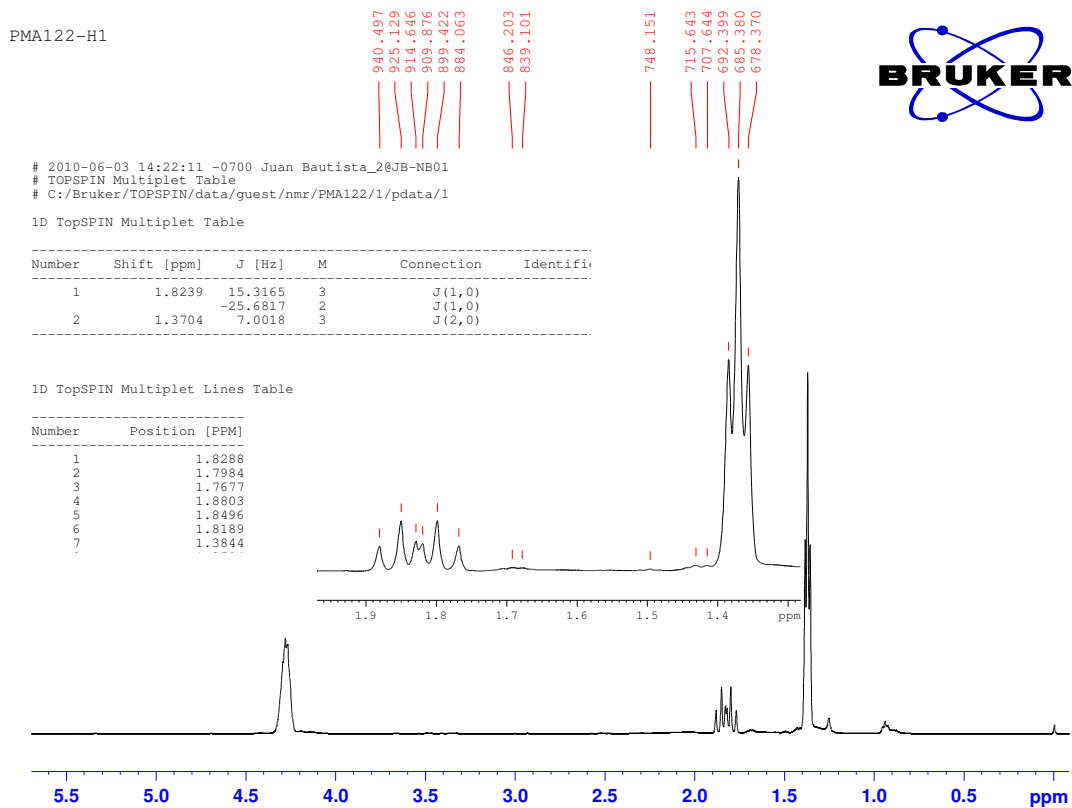<sup>1</sup>H NMR spectrum of compound 26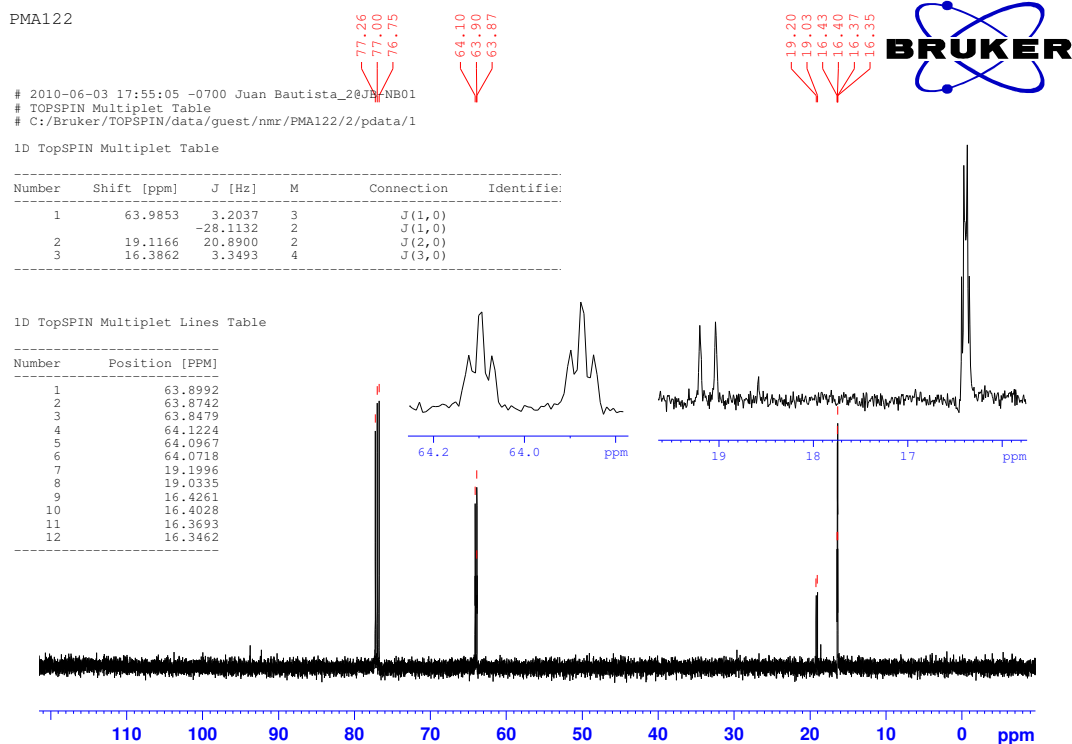<sup>13</sup>C NMR spectrum of compound 26

PMA122-31P

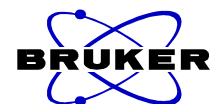

# 2010-03-30 15:24:16 -0700 Juan Bautista\_2@JB-NB01  
# TOPSPIN Multiplet Table  
# C:/Bruker/TOPSPIN/data/guest/nmr/PMA122/3/pdata/1

1D TopSPIN Multiplet Table

| Number | Shift [ppm] | J [Hz]  | M | Connection | Identifier |
|--------|-------------|---------|---|------------|------------|
| 1      | 14.9248     | 72.1352 | 2 | J(1,0)     |            |

1D TopSPIN Multiplet Lines Table

| Number | Position [PPM] |
|--------|----------------|
| 1      | 15.1030        |
| 2      | 14.7467        |

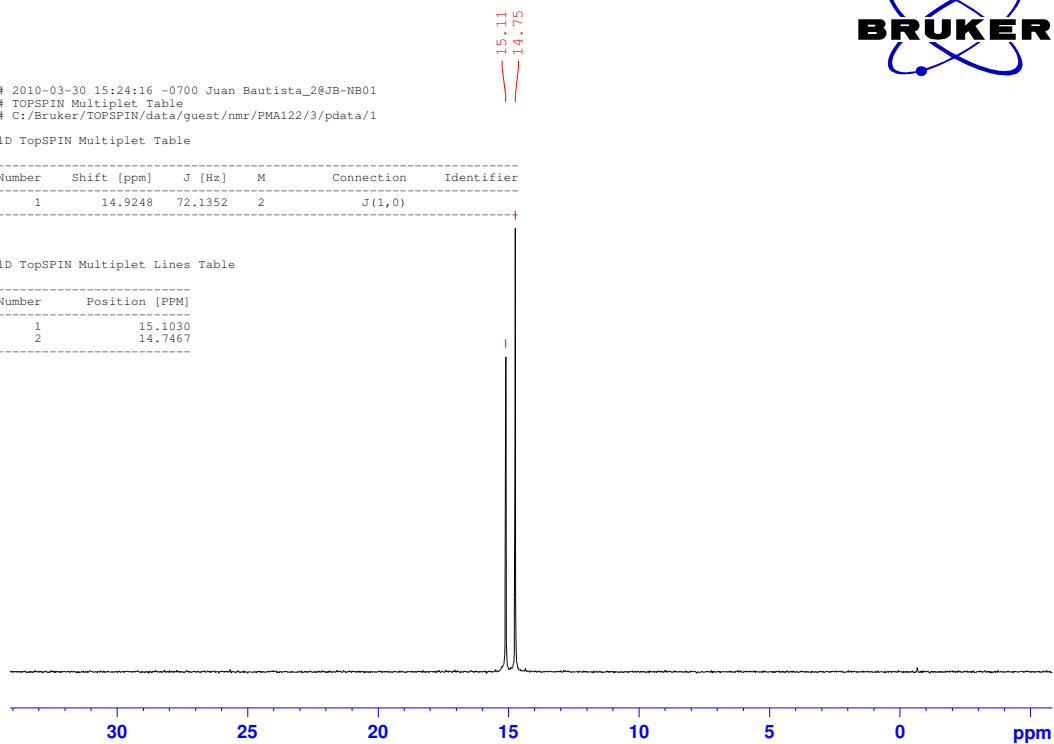 $^{31}\text{P}$  NMR spectrum of compound **26**

1H

1.71  
1.68  
1.66  
1.66  
1.63  
1.60

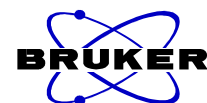

# 2010-04-20 15:41:05 -0700 Juan Bautista\_2@JB-NB01  
# TOPSPIN Multiplet Table  
# C:/Bruker/TOPSPIN/data/guest/nmr/F2-OH 19-04-10/1/pdata/1

1D TopSPIN Multiplet Table

| Number | Shift [ppm] | J [Hz]   | M | Connection | Identifier |
|--------|-------------|----------|---|------------|------------|
| 1      | 1.6581      | 14.6484  | 3 | J(1,0)     |            |
|        |             | -26.3214 | 2 | J(1,0)     |            |

1D TopSPIN Multiplet Lines Table

| Number | Position [PPM] |
|--------|----------------|
| 1      | 1.6611         |
| 2      | 1.6322         |
| 3      | 1.6025         |
| 4      | 1.7137         |
| 5      | 1.6844         |
| 6      | 1.6551         |

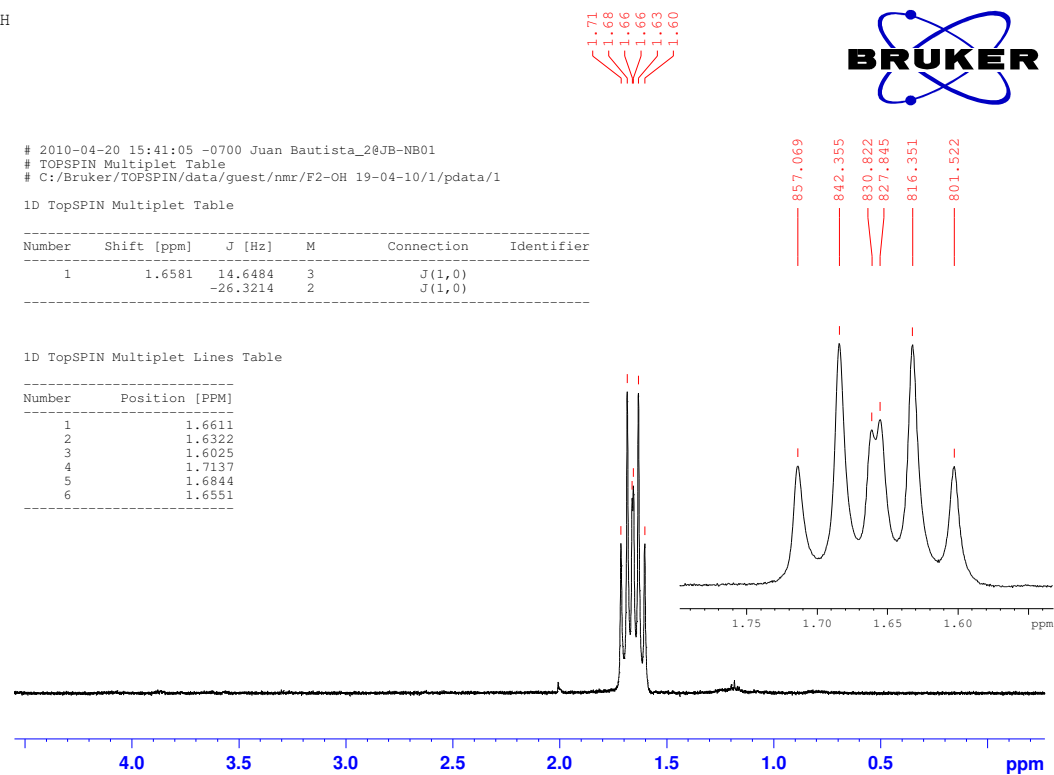 $^1\text{H}$  NMR spectrum of compound **36**

PMA124-13C

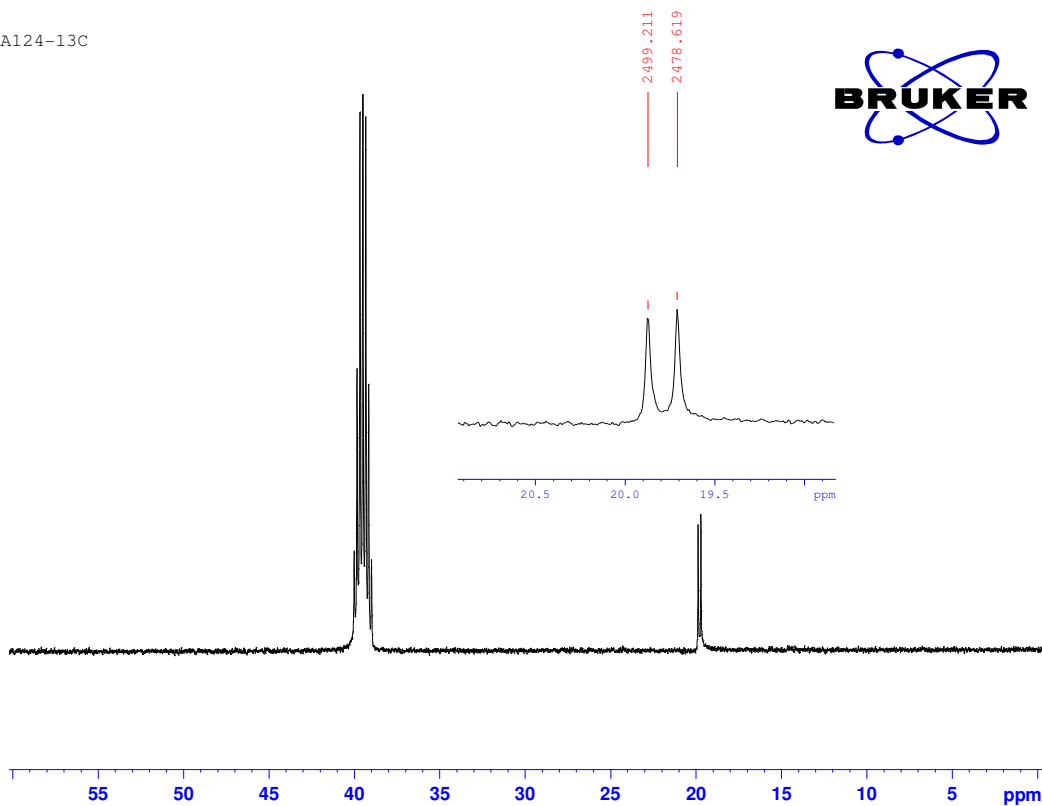<sup>13</sup>C NMR spectrum of compound **36**

PMA124-31P

# 2010-04-06 18:56:00 -0700 Juan Bautista\_2@JB-NB01  
# TOPSPIN Multiplet Table  
# C:/Bruker/TOPSPIN/data/guest/nmr/PMA124/3/pdata/1

1D TopSPIN Multiplet Table

| Number | Shift [ppm] | J [Hz]  | M | Connection | Identifier |
|--------|-------------|---------|---|------------|------------|
| 1      | 12.2398     | 69.6597 | 2 | J(1,0)     |            |

1D TopSPIN Multiplet Lines Table

| Number | Position [PPM] |
|--------|----------------|
| 1      | 12.4119        |
| 2      | 12.0678        |

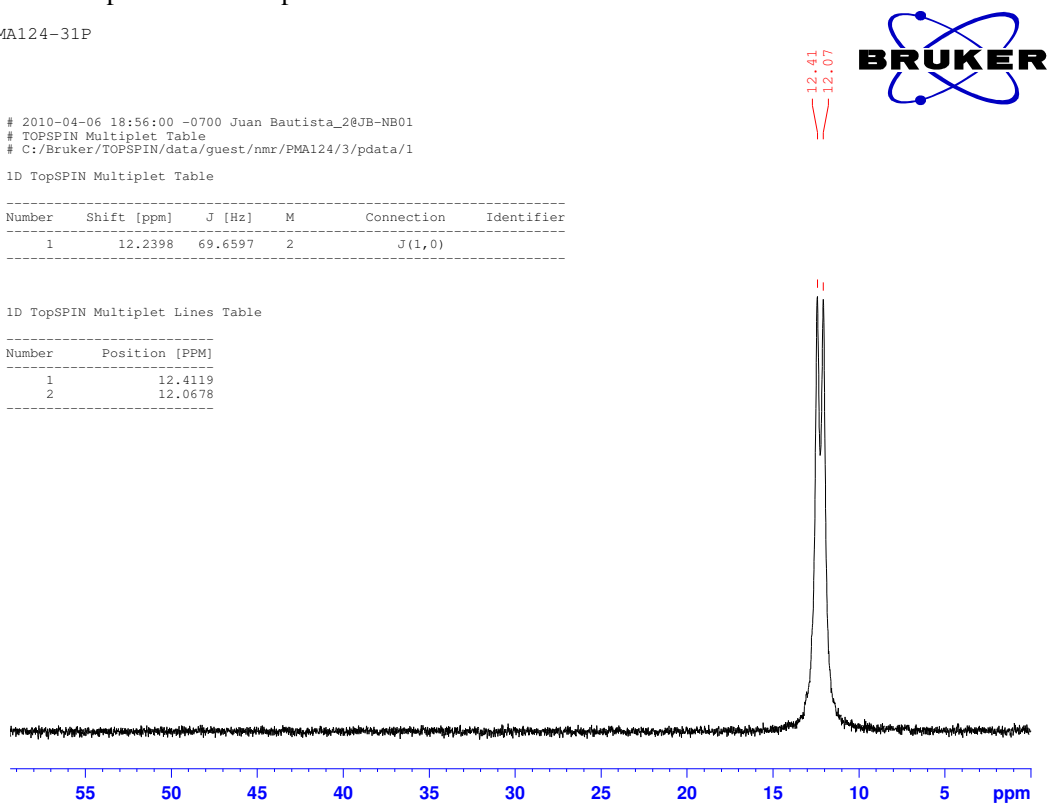<sup>31</sup>P NMR spectrum of compound **36**



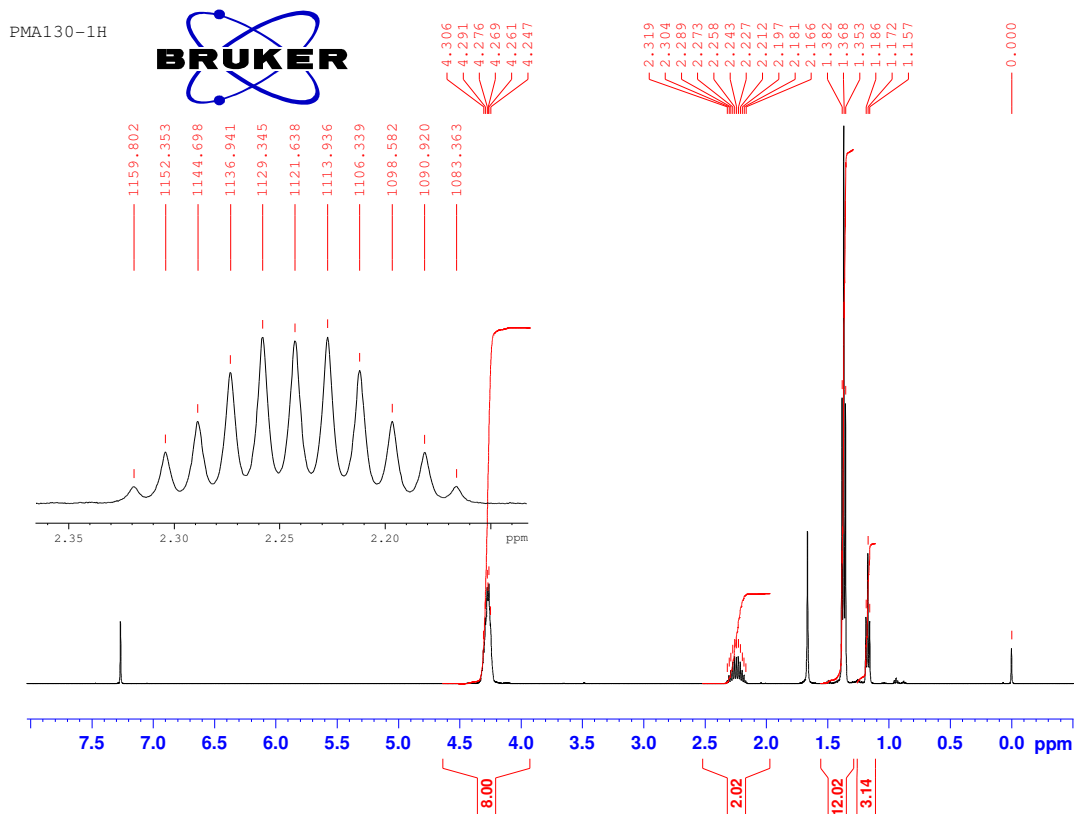<sup>1</sup>H NMR spectrum of compound 27

PMA130-13C

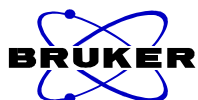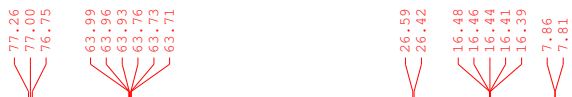

# 2006-07-26 16:37:11 -0300 Juan Bautista@JB-PC2  
 # TOPSPIN Multiplet Table  
 # C:/Bruker/TOPSPIN/data/guest/nmr/PMA130/2/pdata/1

1D TopSPIN Multiplet Table

| Number | Shift [ppm] | J [Hz]  | M | Connect |
|--------|-------------|---------|---|---------|
| 1      | 63.9601     | 3.1817  | 3 | J(1)    |
| 2      | 63.8446     | 28.1572 | 2 | J(2)    |
| 3      | 63.7290     | 3.1817  | 3 | J(3)    |
| 4      | 26.5052     | 20.8884 | 2 | J(4)    |
| 5      | 7.8319      | 5.4496  | 2 | J(5)    |
|        |             | 12.7157 | 2 | J(5)    |

1D TopSPIN Multiplet Lines Table

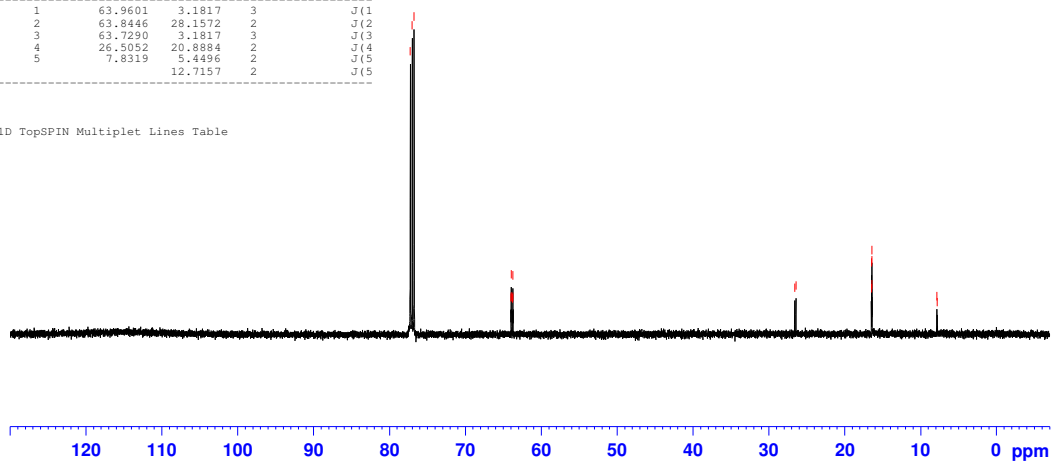<sup>13</sup>C NMR spectrum of compound 27

PMA130-31P

# 2010-04-08 13:28:59 -0700 Juan Bautista\_2@JB-NB01  
# TOPSPIN Multiplet Table  
# C:/Bruker/TOPSPIN/data/guest/nmr/PMA130/3/pdata/1

1D TopSPIN Multiplet Table

| Number | Shift [ppm] | J [Hz]  | M | Connection | IC |
|--------|-------------|---------|---|------------|----|
| 1      | 15.0047     | 74.6354 | 2 | J(1,0)     |    |

1D TopSPIN Multiplet Lines Table

| Number | Position [PPM] |
|--------|----------------|
| 1      | 15.1890        |
| 2      | 14.8204        |

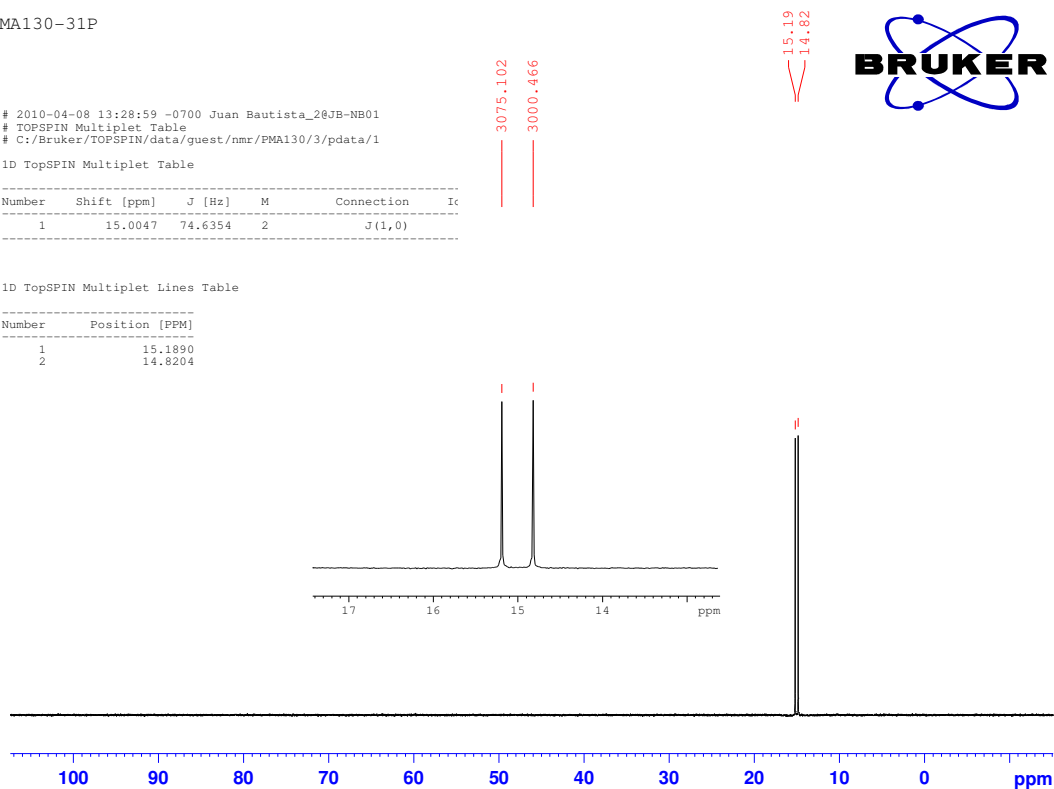<sup>31</sup>P NMR spectrum of compound **27**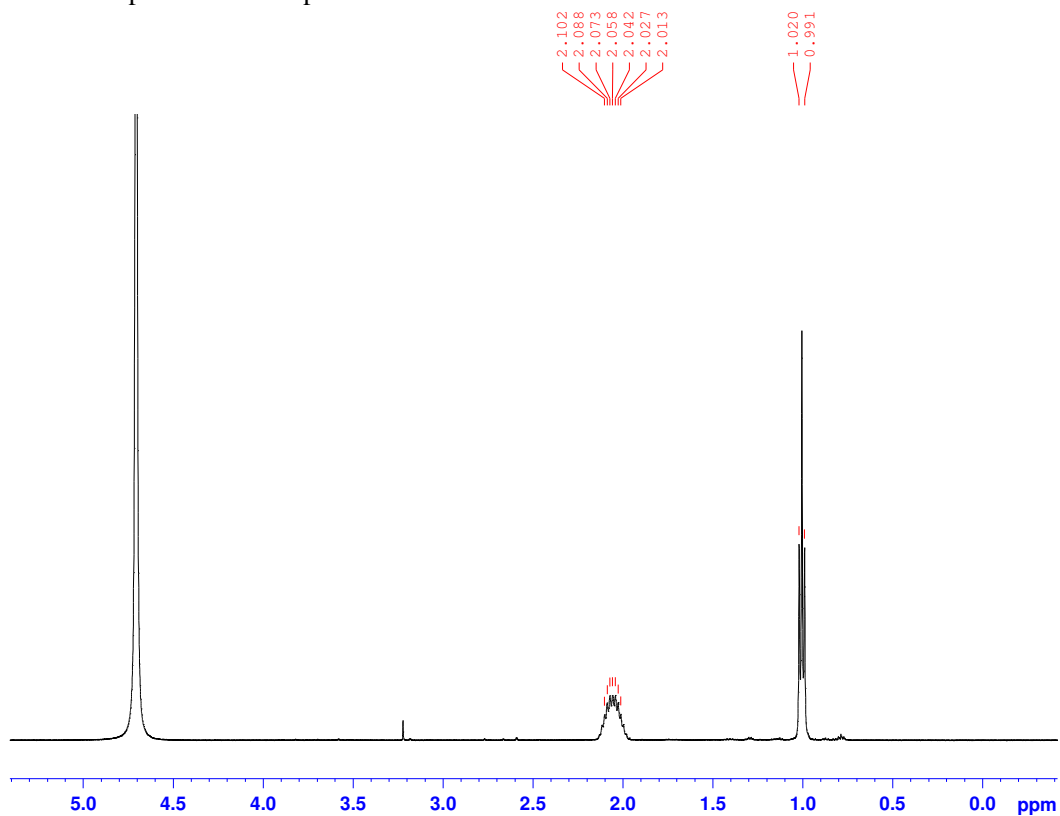<sup>1</sup>H NMR spectrum of compound **37**

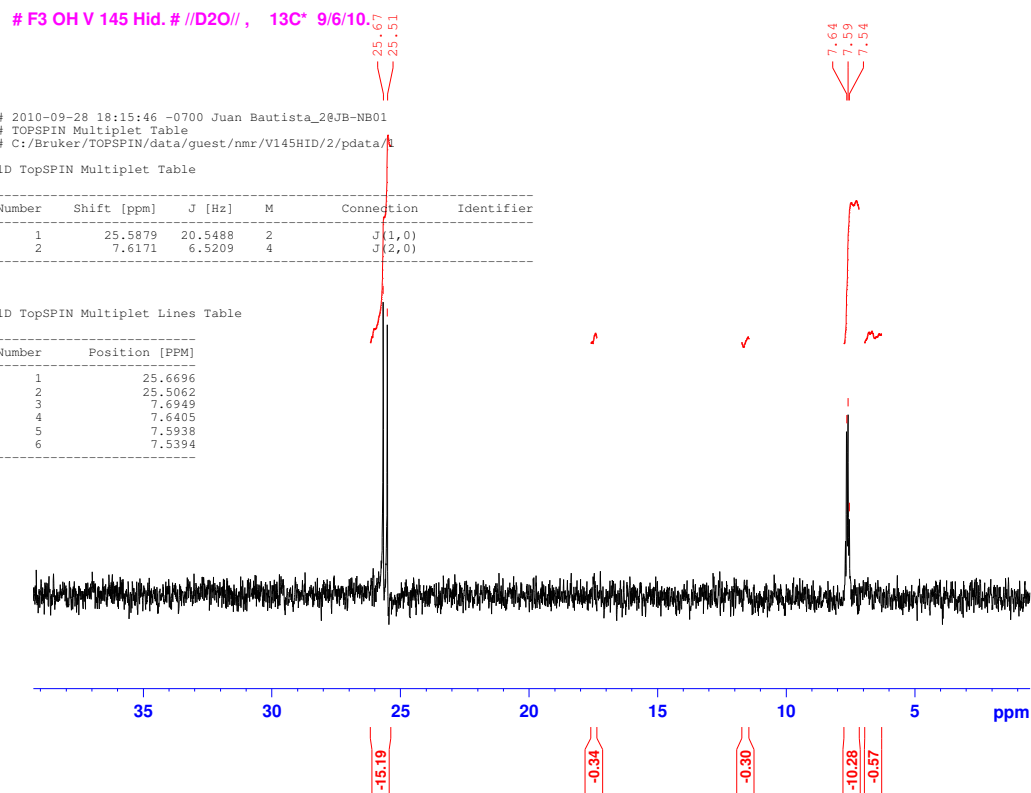 $^{13}\text{C}$  NMR spectrum of compound **37**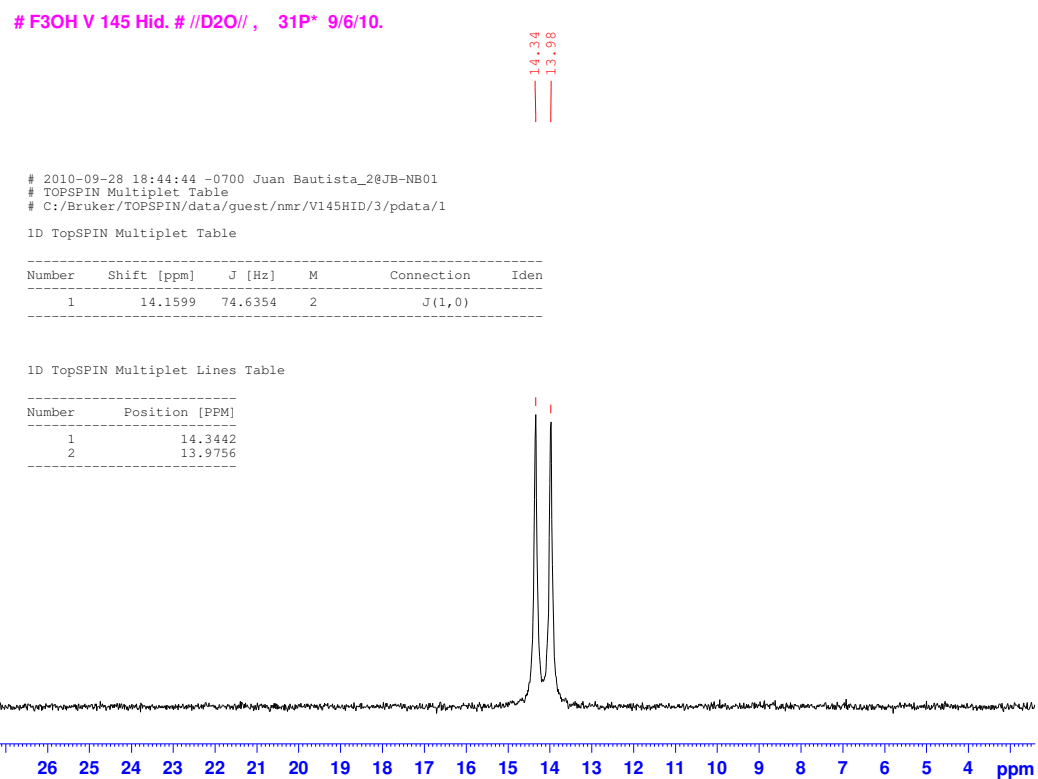 $^{31}\text{P}$  NMR spectrum of compound **37**

## F4 OEt 1H NMR CDCl3

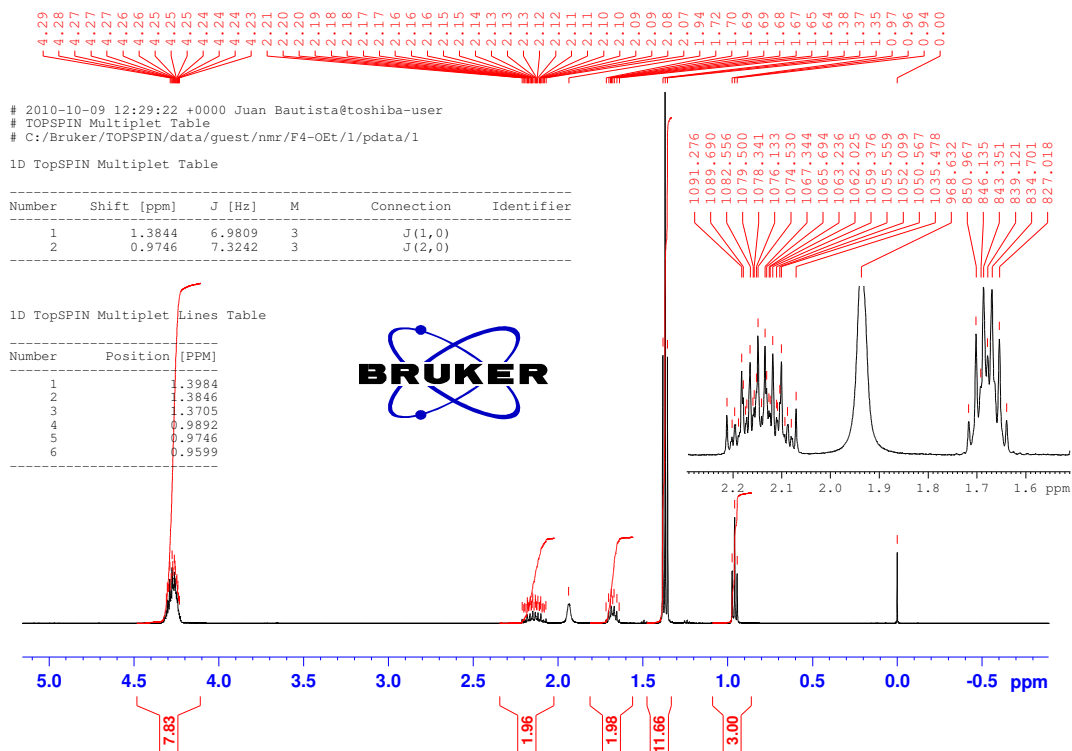<sup>1</sup>H NMR spectrum of compound 28

# F4-OEt # //CDCl3//, 13C\* 8/10/10.

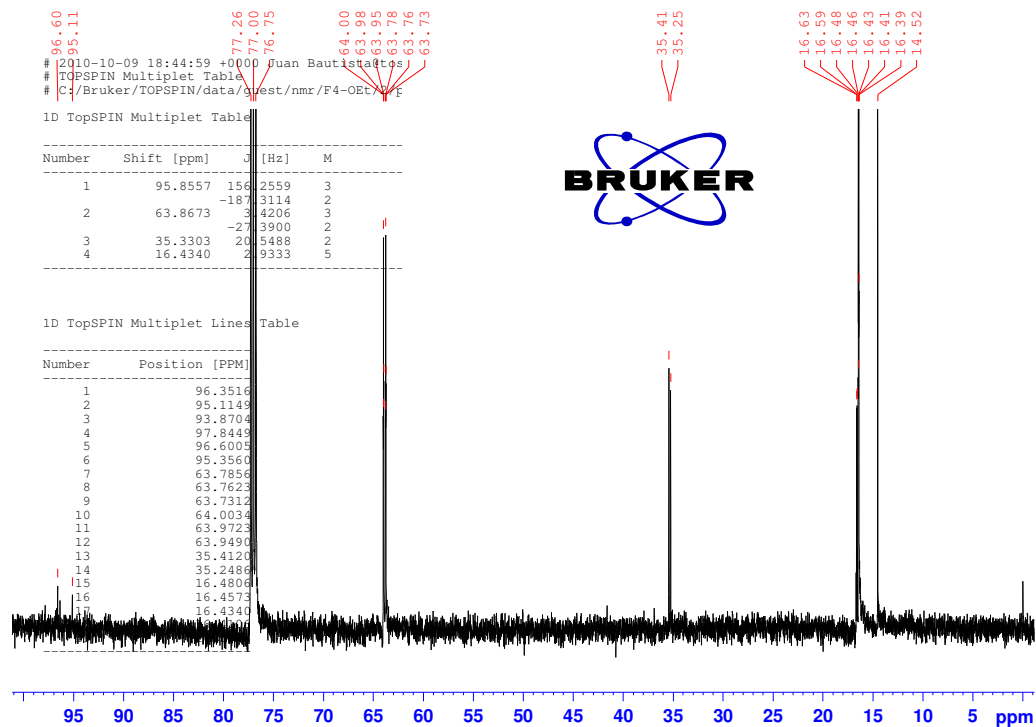<sup>13</sup>C NMR spectrum of compound 28

## F4 OEt 31P NMR CCCI3

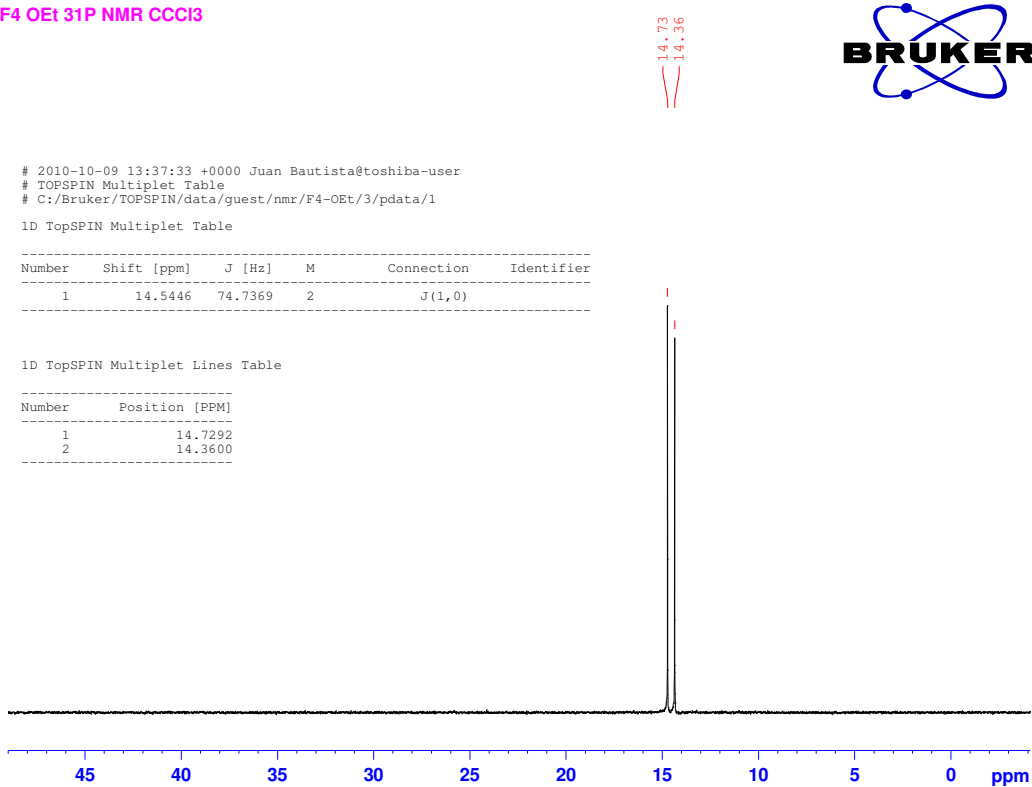<sup>31</sup>P NMR spectrum of compound 28

PMA150-1H

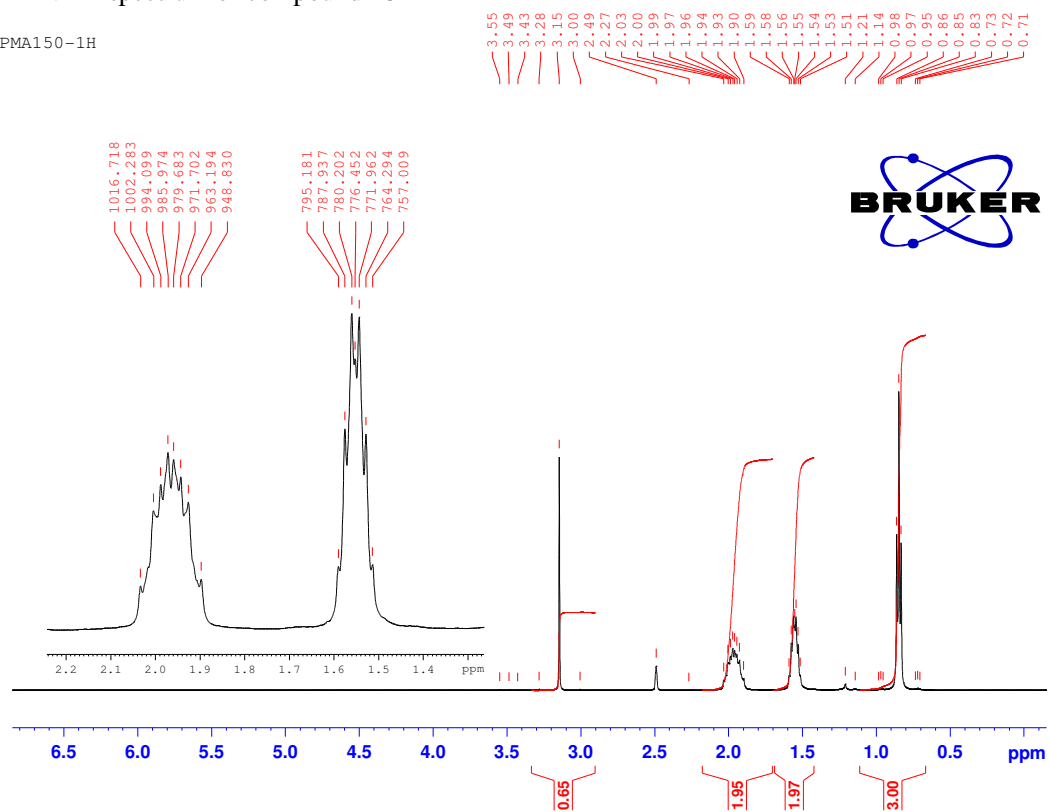<sup>1</sup>H NMR spectrum of compound 38

PMA150-13C

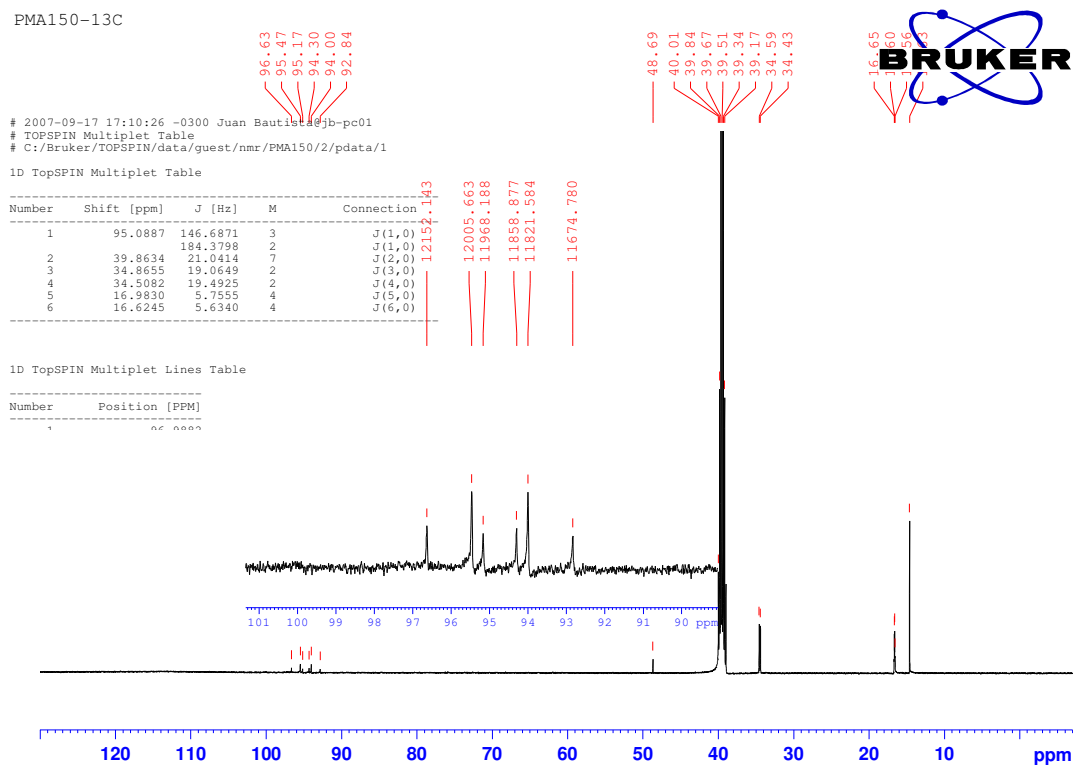<sup>13</sup>C NMR spectrum of compound 38

PMA150-31P

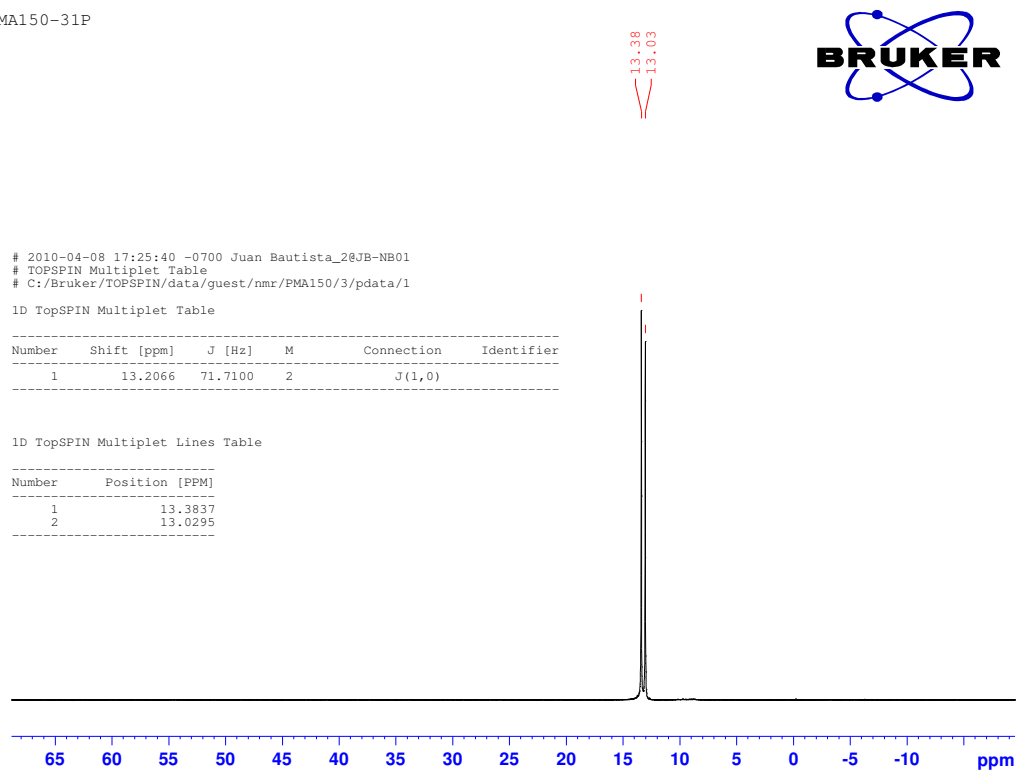<sup>31</sup>P NMR spectrum of compound 38

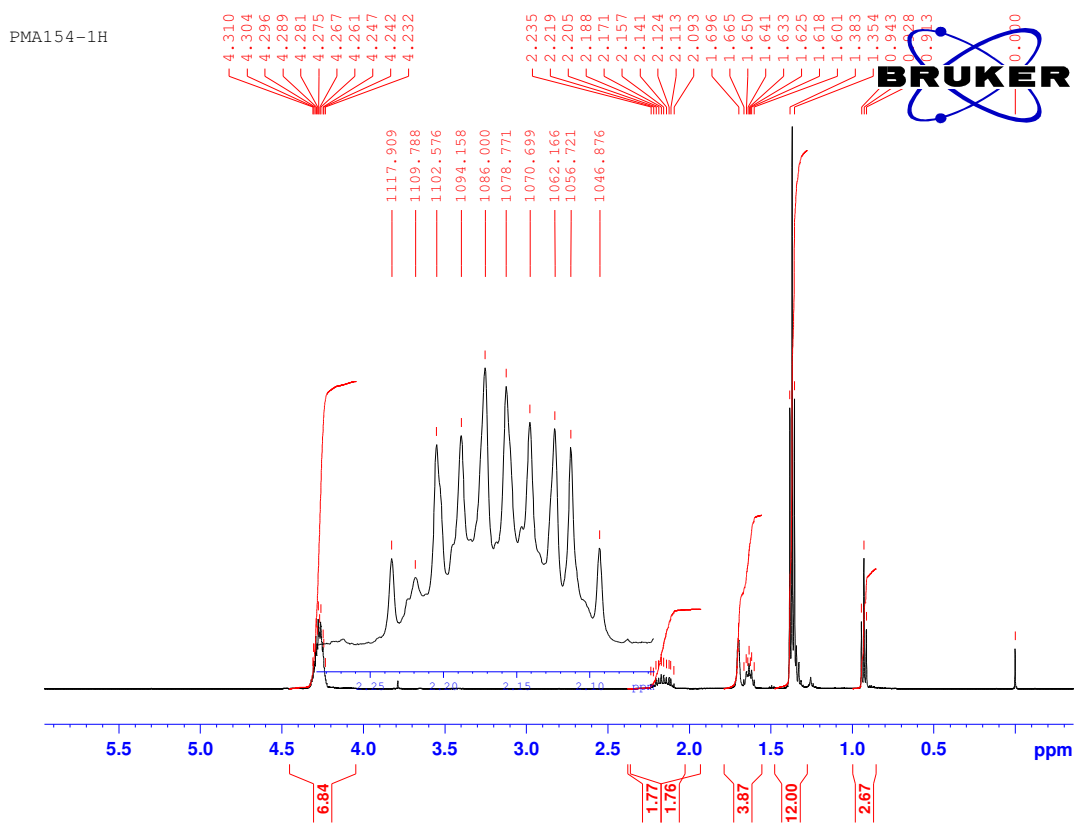<sup>1</sup>H NMR spectrum of compound **29**

PMA154-13C

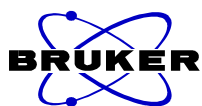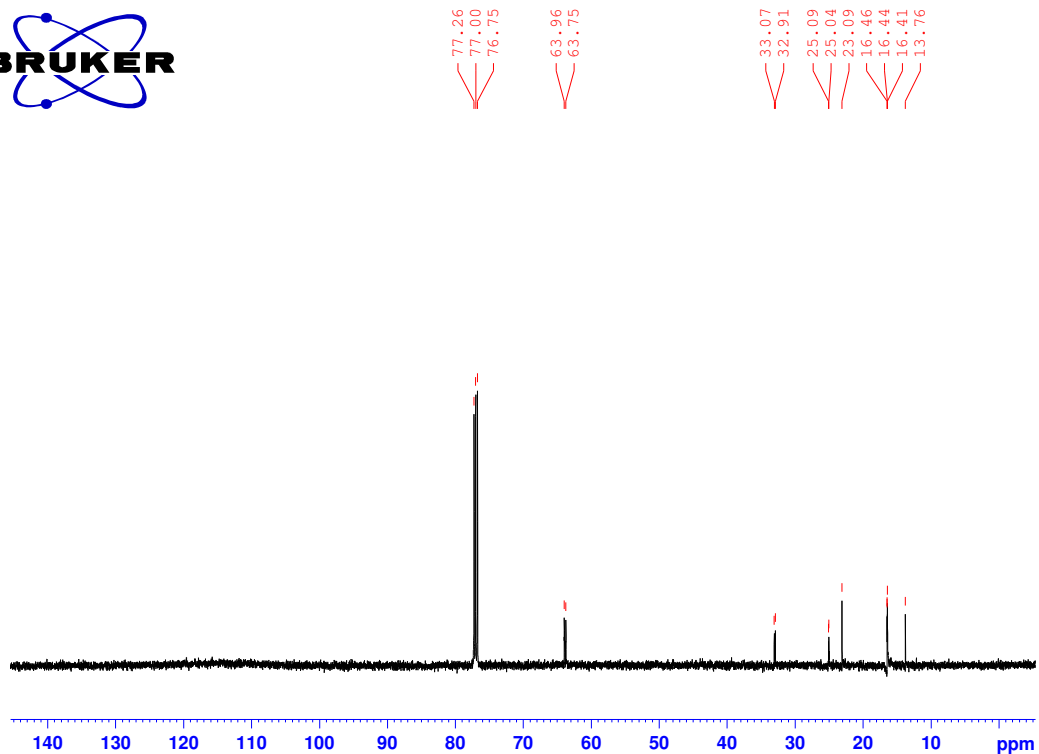<sup>13</sup>C NMR spectrum of compound **29**

PMA154-31P

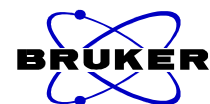

# 2010-04-09 18:33:27 -0700 Juan Bautista\_2@JB-1  
# TOPSPIN Multiplet Table  
# C:/Bruker/TOPSPIN/data/guest/nmr/PMA154/3/pdat

1D TopSPIN Multiplet Table

| Number | Shift [ppm] | J [Hz]  | M | Co |
|--------|-------------|---------|---|----|
| 1      | 14.5688     | 74.6354 | 2 |    |

1D TopSPIN Multiplet Lines Table

| Number | Position [PPM] |
|--------|----------------|
| 1      | 14.7531        |
| 2      | 14.3844        |

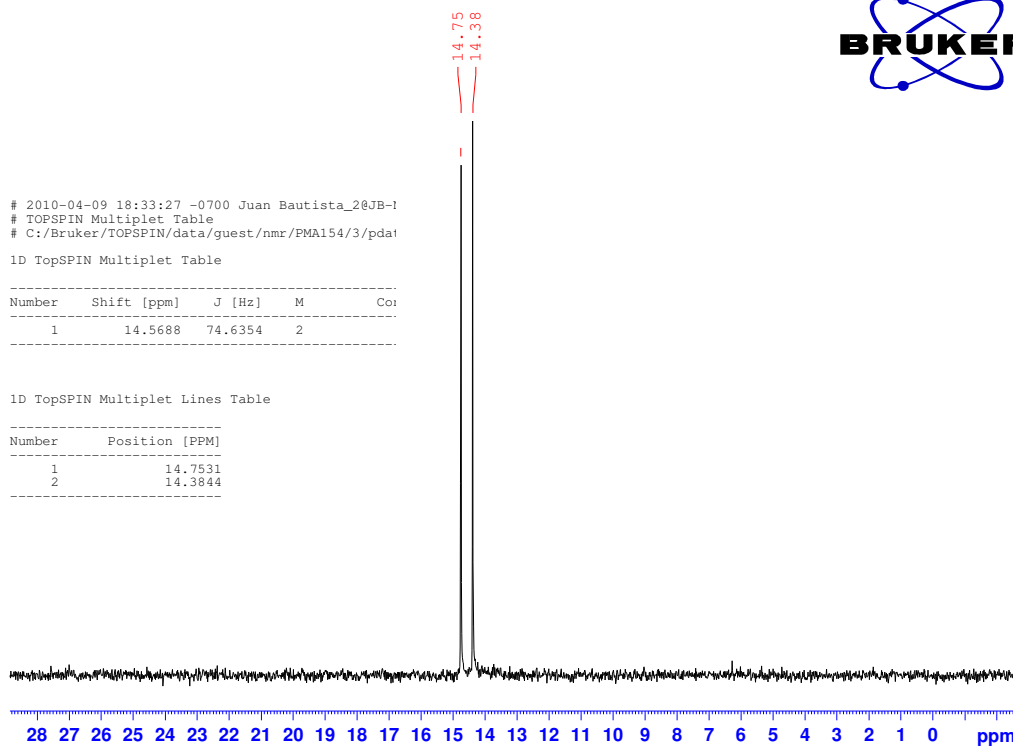<sup>31</sup>P NMR spectrum of compound 29

F5 OH PMA 157 /D2O/ 1H NMR

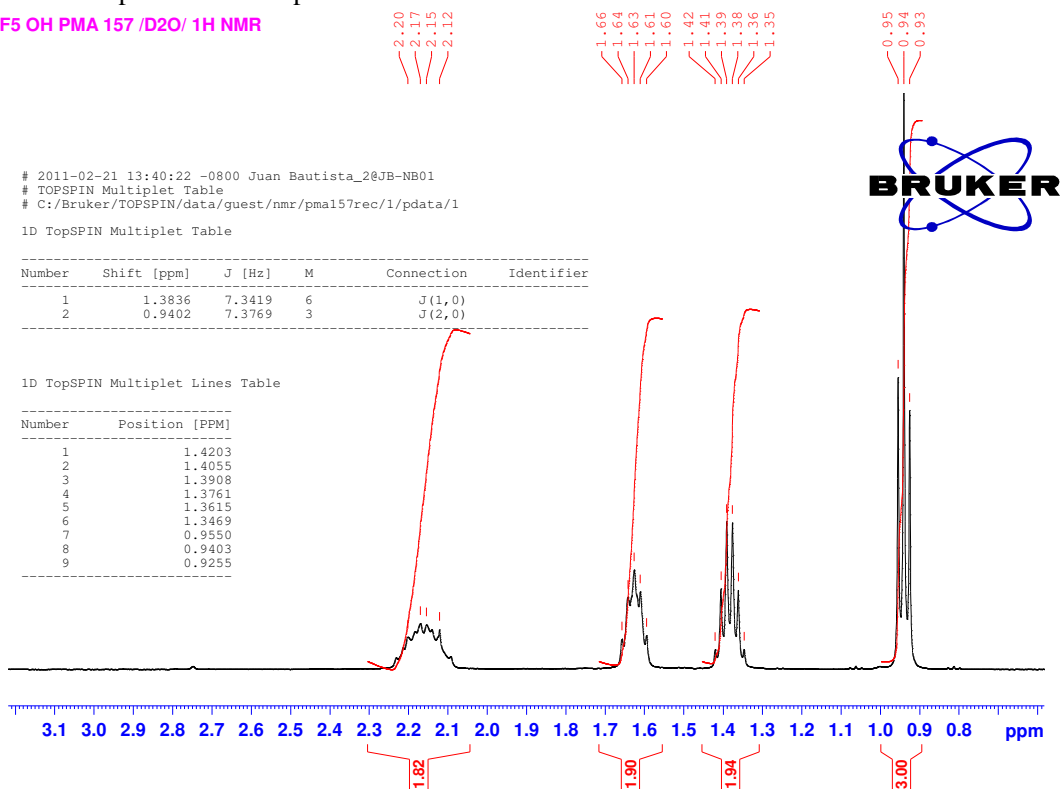<sup>1</sup>H NMR spectrum of compound 39



F5 OH PMA 157 /D2O/ <sup>13</sup>C NMR..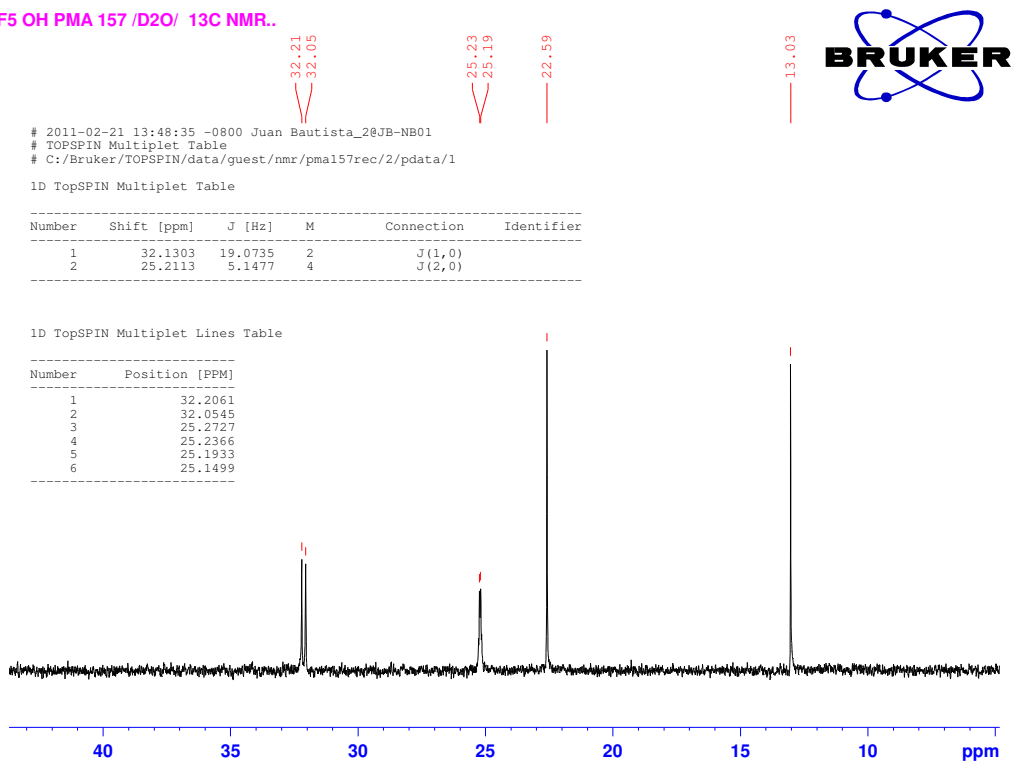<sup>13</sup>C NMR spectrum of compound 39

# F-6 (OE)3 # //CDCl3//

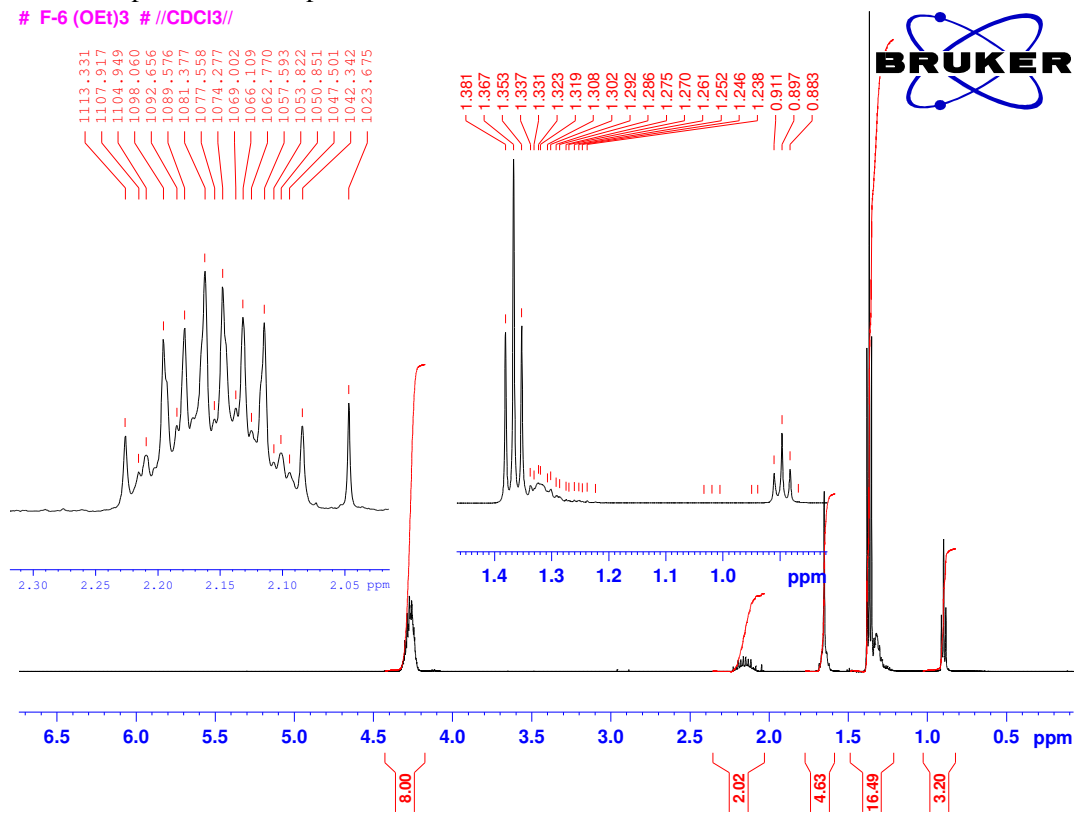<sup>1</sup>H NMR spectrum of compound 30

# PMA-156 - #1 # //CDCI3//, <sup>13</sup>C NMR\*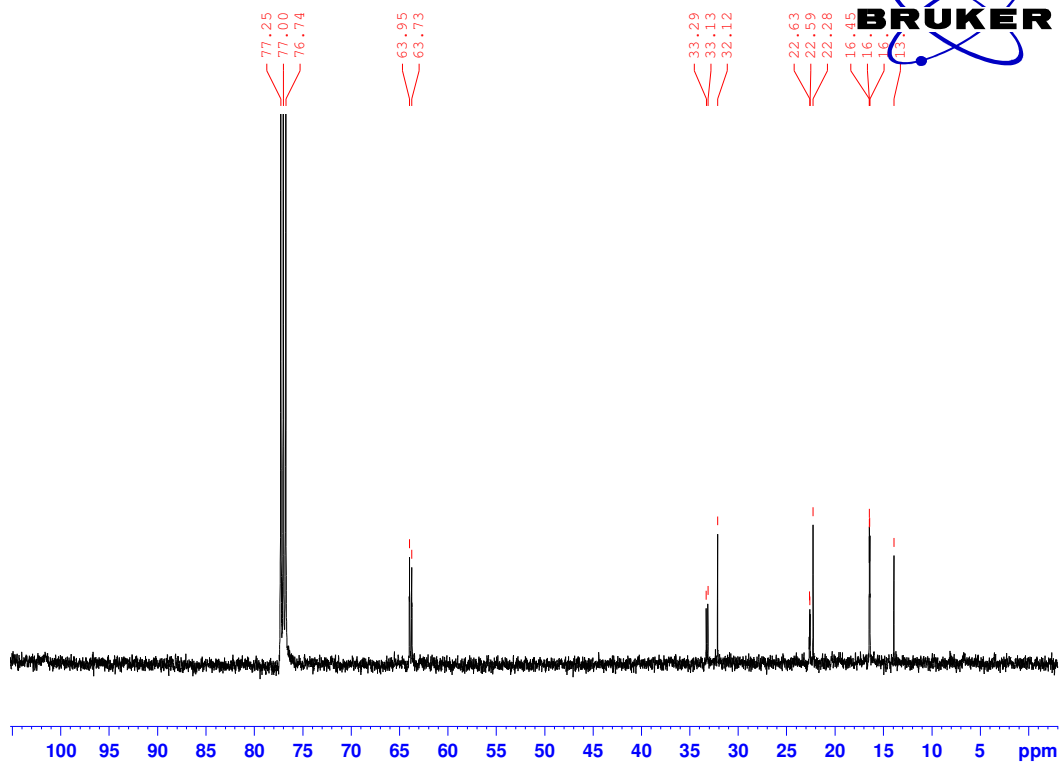<sup>13</sup>C NMR spectrum of compound **30**# PMA-156 - #1 # //CDCI3//, <sup>31</sup>P NMR

# 2010-06-01 10:54:02 -0700 Juan Bautista\_2@JB-NB01  
 # TOPSPIN Multiplet Table  
 # C:/Bruker/TOPSPIN/data/guest/nmr/pma156\_1/3/pdata/1

1D TopSPIN Multiplet Table

| Number | Shift [ppm] | J [Hz]  | M | Connection | Identifier |
|--------|-------------|---------|---|------------|------------|
| 1      | 15.0170     | 74.6354 | 2 | J(1,0)     |            |

1D TopSPIN Multiplet Lines Table

| Number | Position [PPM] |
|--------|----------------|
| 1      | 15.2013        |
| 2      | 14.8327        |

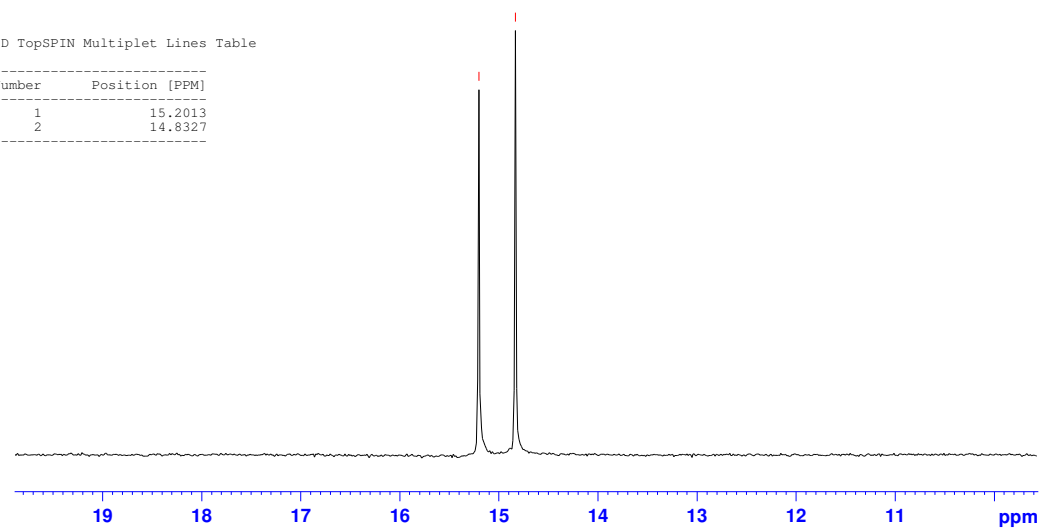<sup>31</sup>P NMR spectrum of compound **30**

F6 OH PMA-158 # 1H NMR

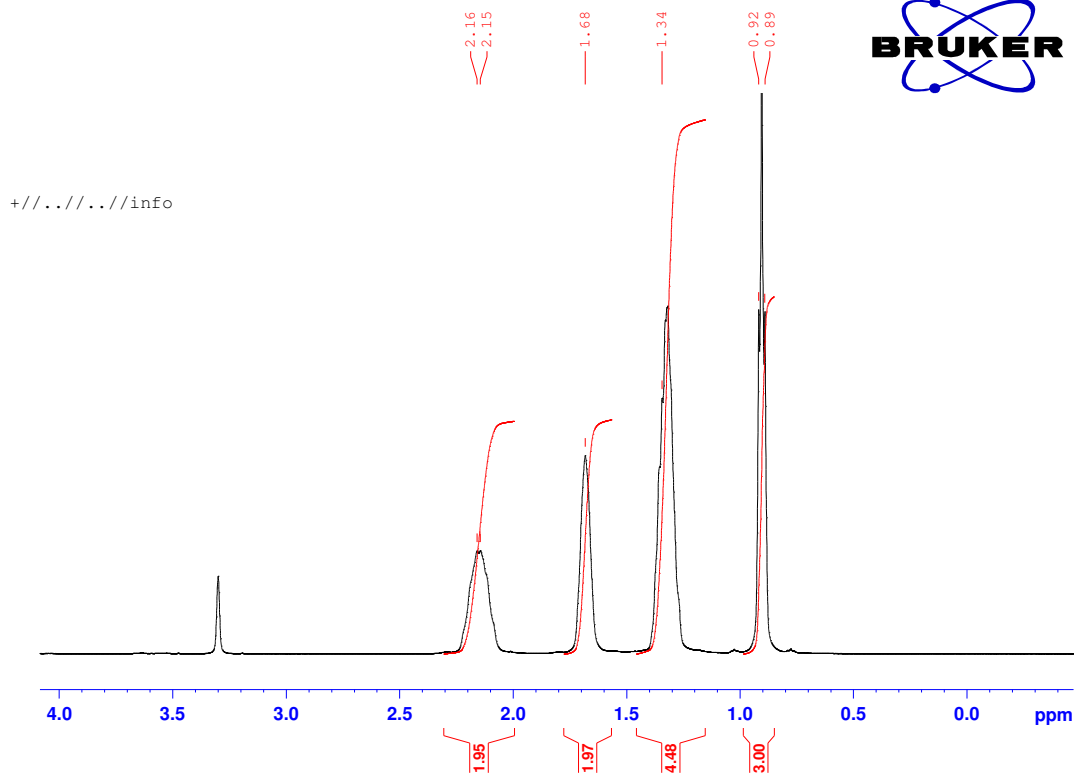<sup>1</sup>H NMR spectrum of compound **40**

F6 OH # PMA-158 # 13C NMR

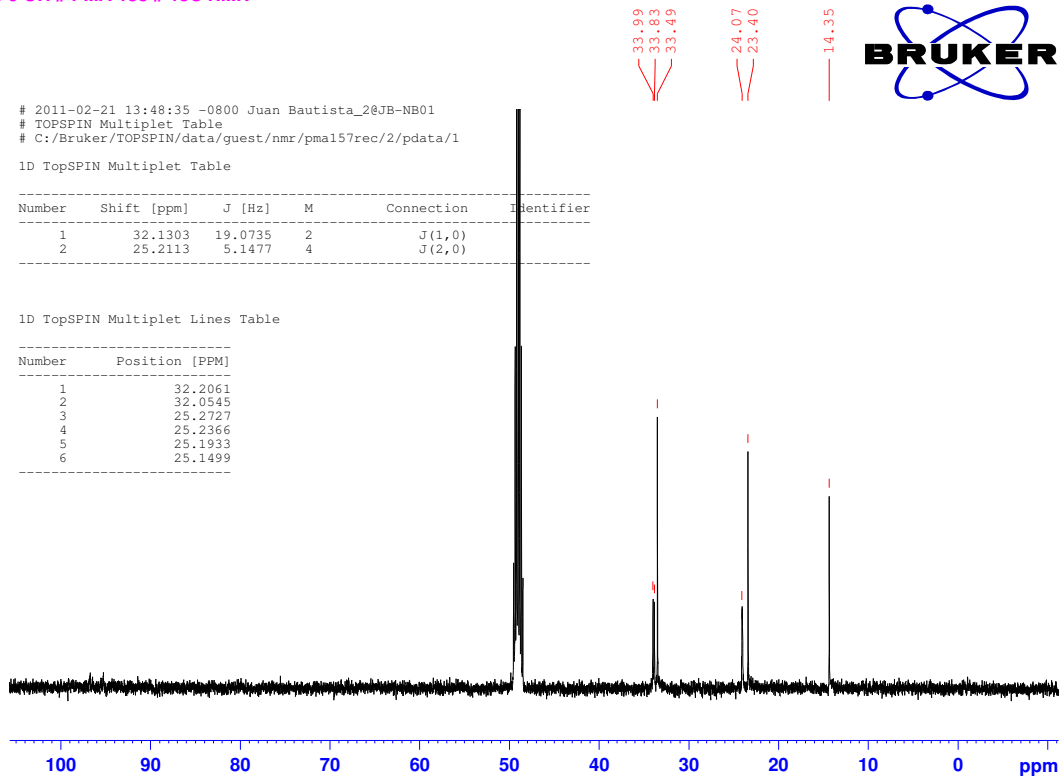<sup>13</sup>C NMR spectrum of compound **40**

F7 (OE)2 (V 135, #3, F7) //CDCl3//, <sup>1</sup>H NMR 2/6/10.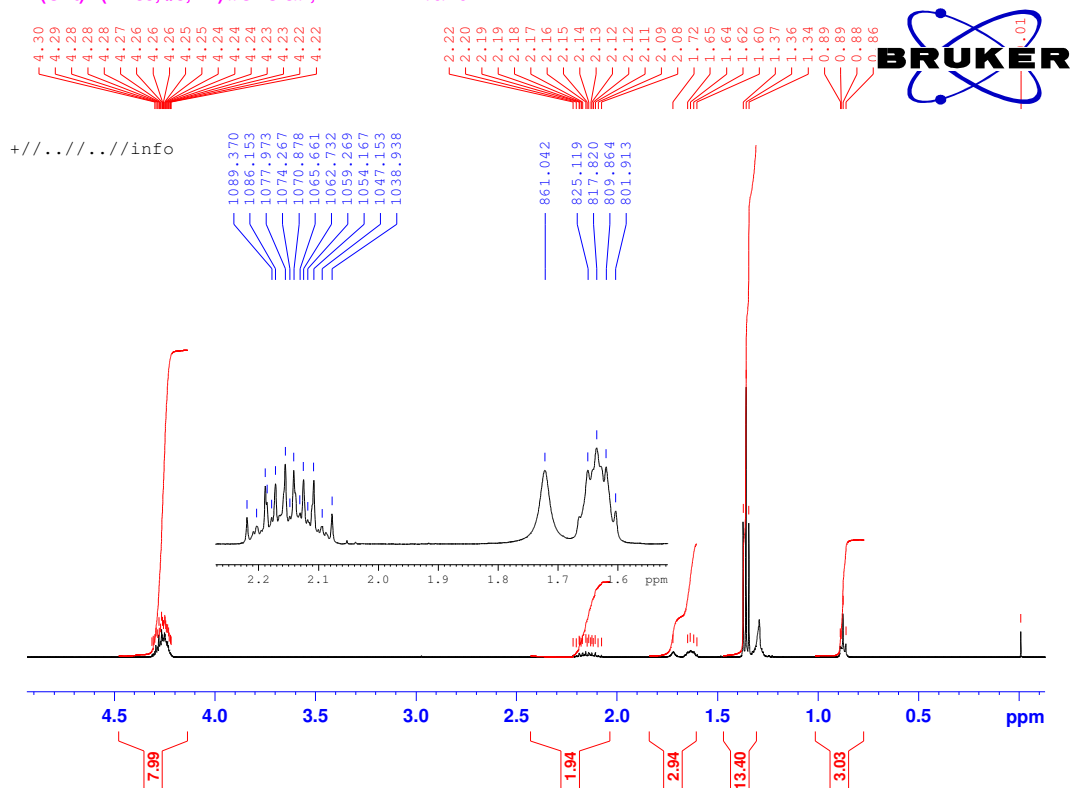<sup>1</sup>H NMR spectrum of compound 31F7 (OE)2 (V 135, #3, F7) # //CDCl3//, <sup>13</sup>C NMR 2/6/10.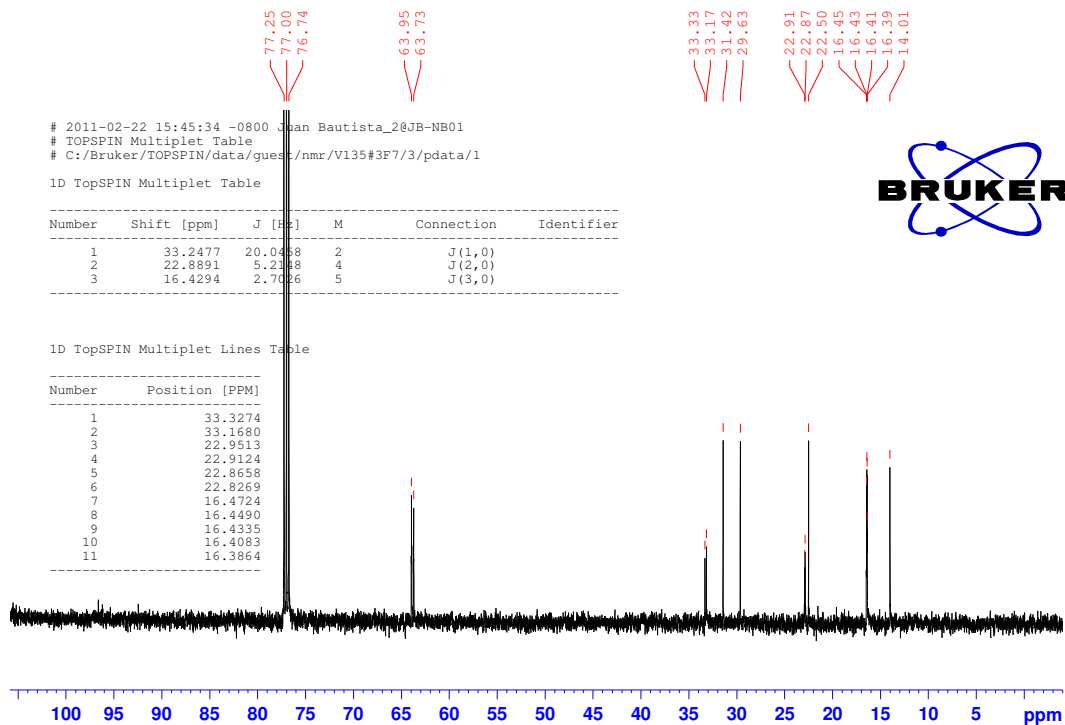<sup>13</sup>C NMR spectrum of compound 31

F7 (OEt)2 # (V 135, #3, F7) # //CDCI3//, <sup>31</sup>P NMR 2/6/10.

14.77  
14.40

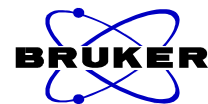

# 2011-02-22 15:50:27 -0800 Juan Bautista\_2@JB-NB01  
# TOPSPIN Multiplet Table  
# C:/Bruker/TOPSPIN/data/guest/nmr/V135#3F7/2/pdata/1

1D TopSPIN Multiplet Table

| Number | Shift [ppm] | J [Hz]  | M | Connection | Identifier |
|--------|-------------|---------|---|------------|------------|
| 1      | 14.5841     | 74.6254 | 2 | J(1,0)     |            |

1D TopSPIN Multiplet Lines Table

| Number | Position [PPM] |
|--------|----------------|
| 1      | 14.7684        |
| 2      | 14.3998        |

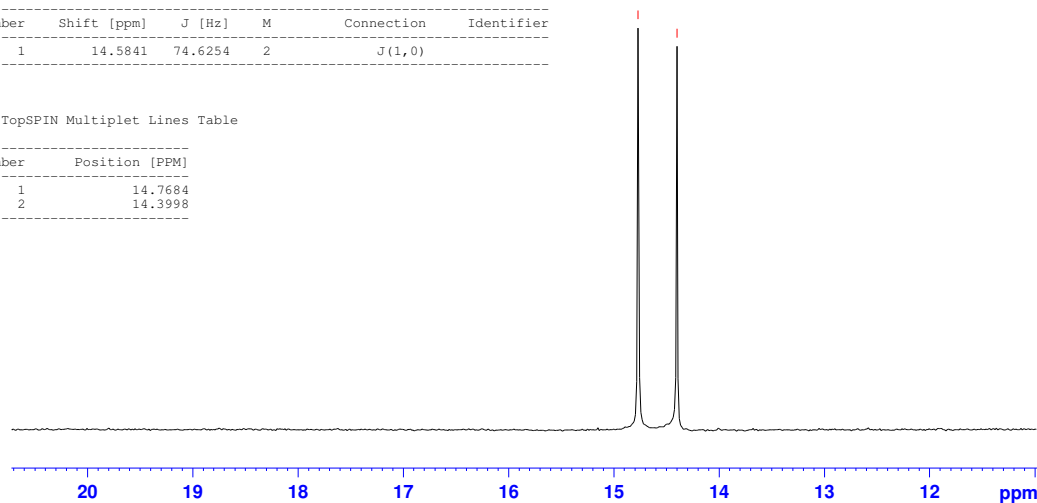

<sup>31</sup>P NMR spectrum of compound 31

# V 135 Hid. # //D2O//, <sup>1</sup>H 2/6/10.

2.06  
2.04  
2.03  
2.01  
1.99  
1.98  
1.53  
1.51  
1.50  
1.48  
1.26  
1.24  
1.22  
1.21  
1.20  
0.78  
0.77  
0.76

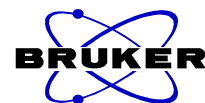

# 2010-06-11 18:55:49 -0700 Juan Bautista\_2@JB-NB01  
# TOPSPIN Multiplet Table  
# C:/Bruker/TOPSPIN/data/guest/nmr/V135 C-13/1/pdata/1

1D TopSPIN Multiplet Table

| Number | Shift [ppm] | J [Hz] | M | Connection | Identifier |
|--------|-------------|--------|---|------------|------------|
| 1      | 1.5127      | 7.5867 | 5 | J(1,0)     |            |
| 2      | 0.7708      | 7.0768 | 3 | J(2,0)     |            |

1D TopSPIN Multiplet Lines Table

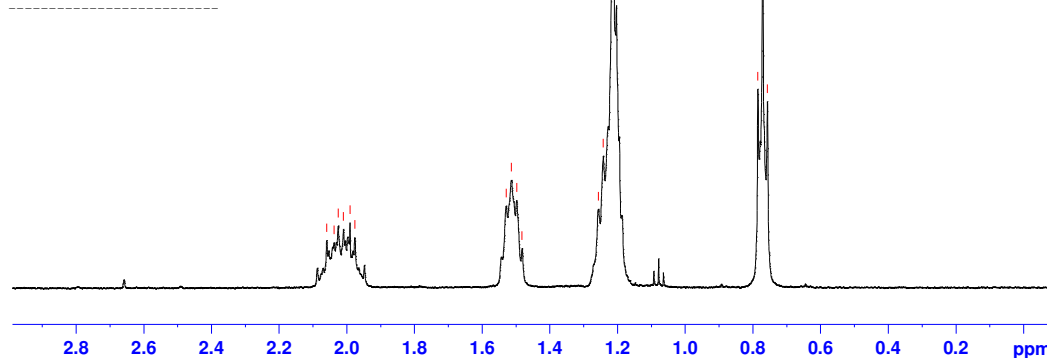

<sup>1</sup>H NMR spectrum of compound 41

# V 135 Hid. # //D2O// , 13C\* 9/6/10.

# 2010-06-11 10:44:46 -0700 Juan Bautista\_2@JB-NB01  
# TOPSPIN Multiplet Table  
# C:/Bruker/TOPSPIN/data/guest/nmr/V135 C-13/pdata/1

1D TopSPIN Multiplet Table

| Number | Shift [ppm] | J [Hz]    | M | Connection | Identifier |
|--------|-------------|-----------|---|------------|------------|
| 1      | 95.8901     | 144.5146  | 3 | J(3,0)     |            |
| 2      | 32.4223     | -181.4433 | 2 | J(1,0)     |            |
| 3      | 22.9826     | 5.5124    | 4 | J(3,0)     |            |

1D TopSPIN Multiplet Lines Table

| Number | Position [PPM] |
|--------|----------------|
| 1      | 96.3237        |
| 2      | 95.1673        |
| 3      | 94.0137        |
| 4      | 97.7548        |
| 5      | 96.5988        |
| 6      | 95.4682        |
| 7      | 32.5005        |
| 8      | 32.3440        |
| 9      | 23.0484        |
| 10     | 23.0071        |
| 11     | 22.9620        |
| 12     | 22.9169        |

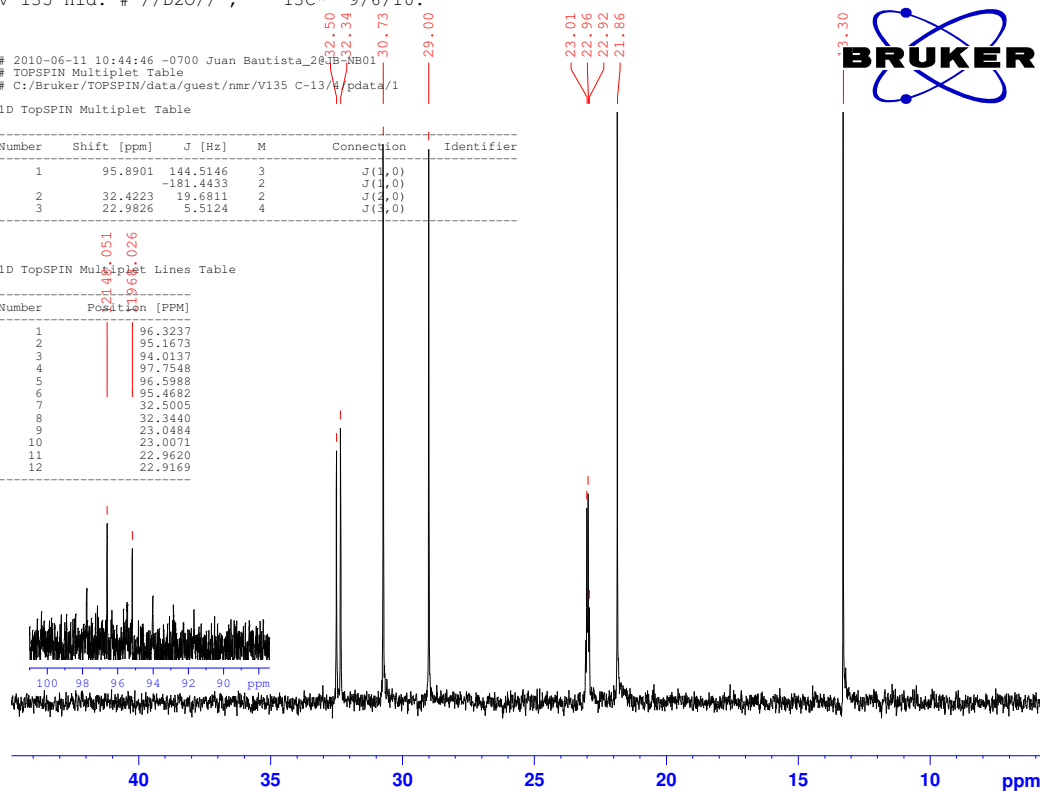<sup>13</sup>C NMR spectrum of compound 41

# V 135 hid. # //D2O// , 31P\* 2/6/10.

# 2010-06-04 14:40:50 -0700 Juan Bautista\_2@JB-NB01  
# TOPSPIN Multiplet Table  
# C:/Bruker/TOPSPIN/data/guest/nmr/V135HID/3/pdata/1

1D TopSPIN Multiplet Table

| Number | Shift [ppm] | J [Hz]  | M | Connection | Identifier |
|--------|-------------|---------|---|------------|------------|
| 1      | 14.1169     | 72.1475 | 2 | J(1,0)     |            |

1D TopSPIN Multiplet Lines Table

| Number | Position [PPM] |
|--------|----------------|
| 1      | 2894.878       |
| 2      | 2821.924       |

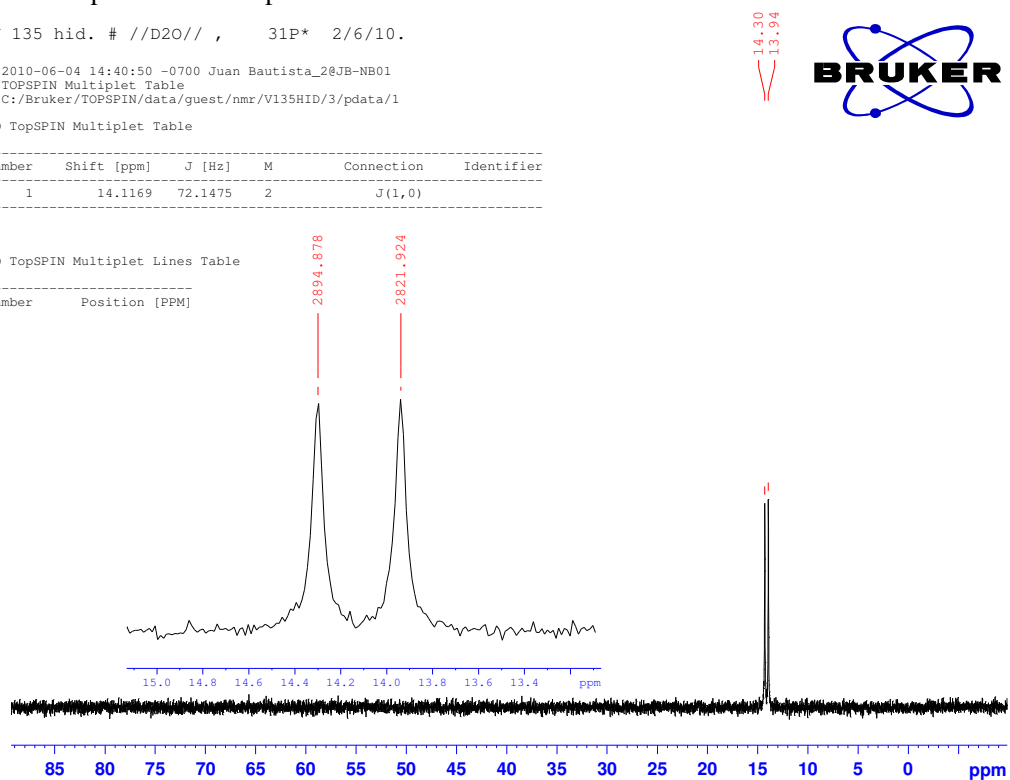<sup>31</sup>P NMR spectrum of compound 41

V149 /CDCl<sub>3</sub>/ <sup>1</sup>H NMR F8 (OE) 18/6/10.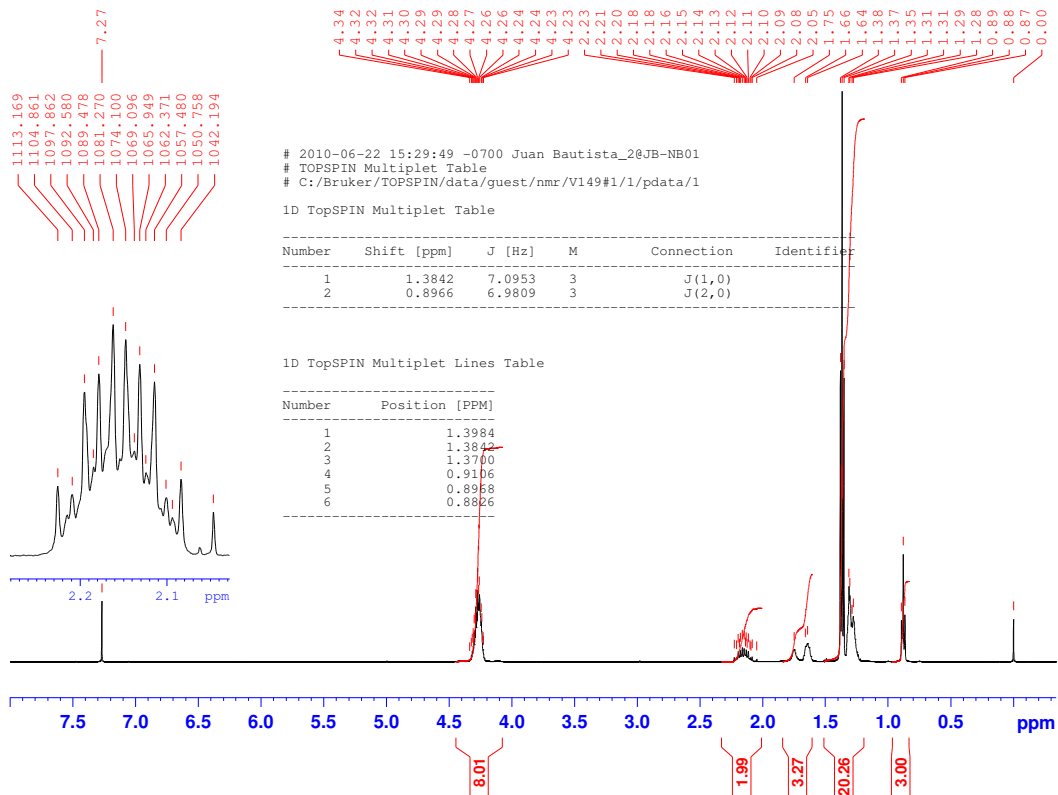<sup>1</sup>H NMR spectrum of compound 32V149 # 1 /CDCl<sub>3</sub>/ <sup>13</sup>C NMR F8 OE 18/6/10.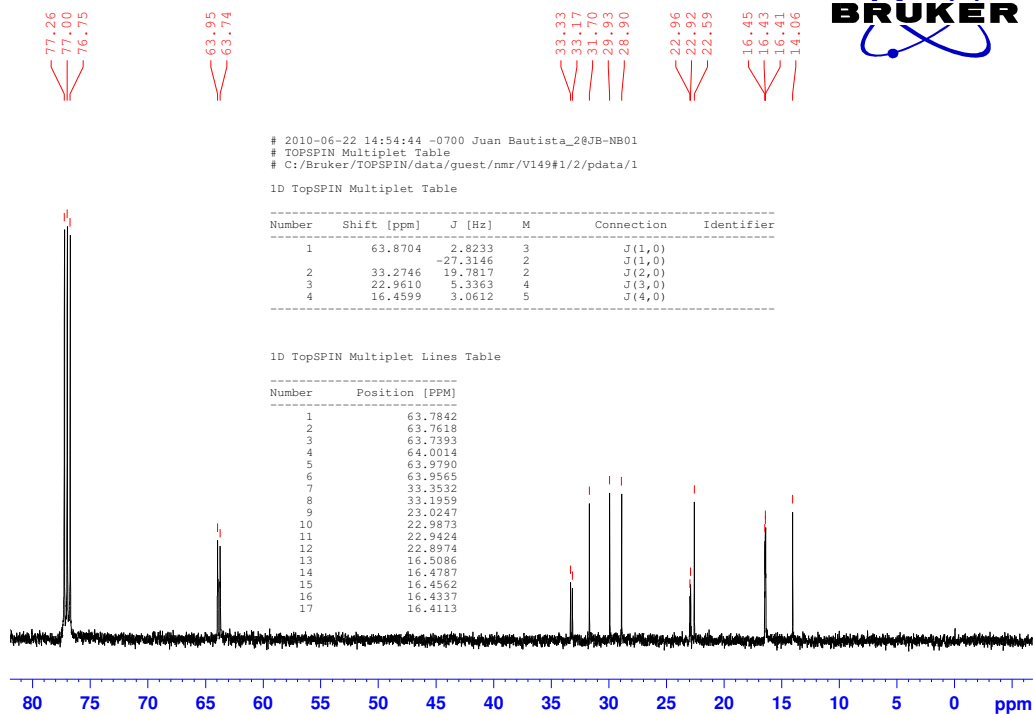<sup>13</sup>C NMR spectrum of compound 32

V149 # 1 /CDCl<sub>3</sub>/ <sup>31</sup>P NMR F8 OEI 18/6/10.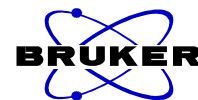

# 2010-06-22 14:27:58 -0700 Juan Bautista\_2@JB-NB01  
# TOPSPIN Multiplet Table  
# C:/Bruker/TOPSPIN/data/guest/nmr/V149#1/3/pdata/1

1D TopSPIN Multiplet Table

| Number | Shift [ppm] | J [Hz]  | M | Connection | Identifier |
|--------|-------------|---------|---|------------|------------|
| 1      | 14.5841     | 74.6354 | 2 | J(1,0)     |            |

1D TopSPIN Multiplet Lines Table

| Number | Position [PPM] |
|--------|----------------|
| 1      | 14.7685        |
| 2      | 14.3998        |

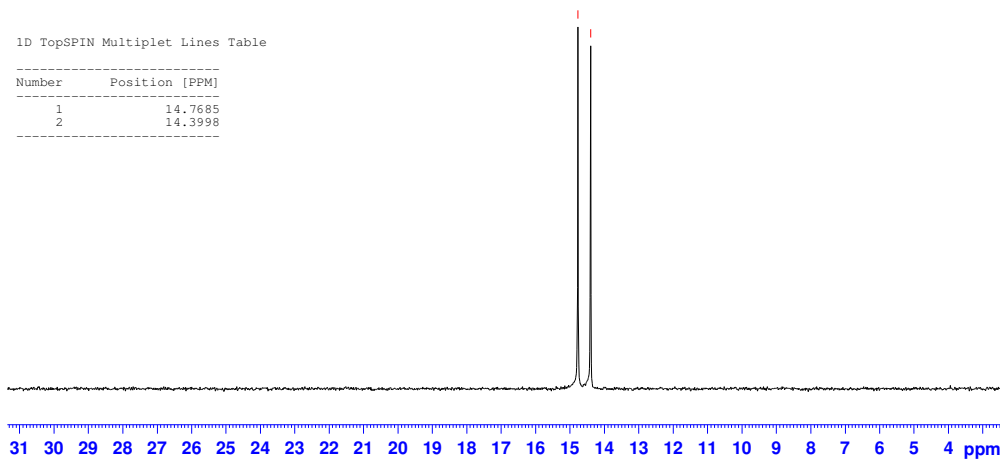<sup>31</sup>P NMR spectrum of compound 32V149HID /D<sub>2</sub>O/ <sup>1</sup>H NMR F8 OH 18/6/10.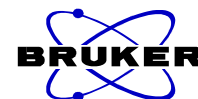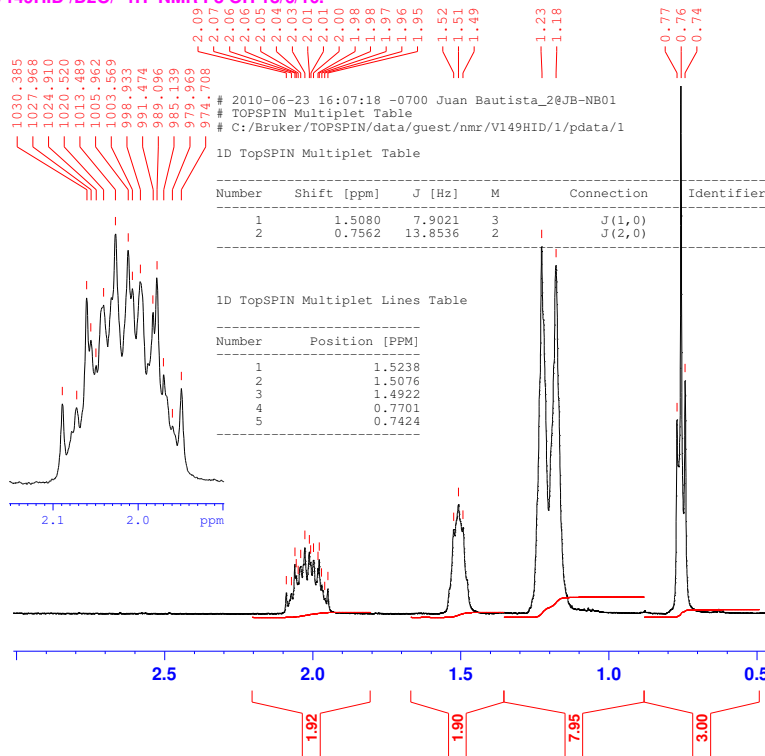<sup>1</sup>H NMR spectrum of compound 42



V149HID /D2O/ <sup>13</sup>C NMR F8 OH 18/6/10.

32.50  
32.35  
31.00  
29.32  
28.13

23.10  
23.05  
21.95

13.35

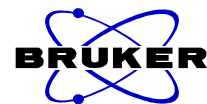

# 2010-06-23 16:53:09 -0700 Juan Bautista\_2@JB-NB01  
# TOPSPIN Multiplet Table  
# C:/Bruker/TOPSPIN/data/guest/nmr/V149HID/2/pdata/1

1D TopSPIN Multiplet Table

| Number | Shift [ppm] | J [Hz]  | M | Connection | Identifier |
|--------|-------------|---------|---|------------|------------|
| 1      | 32.4244     | 18.8380 | 2 | J(1,0)     |            |
| 2      | 23.0734     | 5.3363  | 4 | J(2,0)     |            |

1D TopSPIN Multiplet Lines Table

| Number | Position [PPM] |
|--------|----------------|
| 1      | 32.4993        |
| 2      | 32.3495        |
| 3      | 23.1371        |
| 4      | 23.0996        |
| 5      | 23.0472        |
| 6      | 23.0098        |

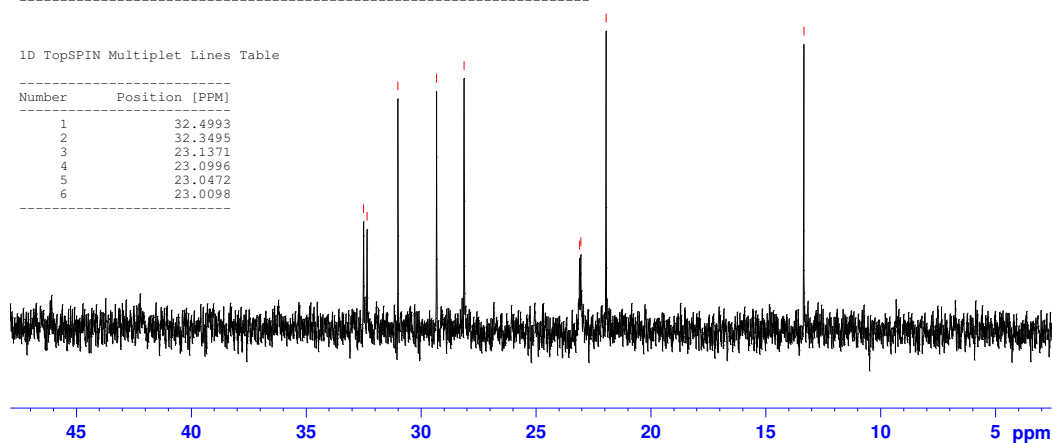<sup>13</sup>C NMR spectrum of compound 42V149HID /D2O/ F8 OH <sup>31</sup>P NMR 18/6/10.

2918.221  
2844.574

14.41  
14.05

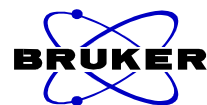

# 2010-06-23 17:54:28 -0700 Juan Bautista\_2@JB-NB01  
# TOPSPIN Multiplet Table  
# C:/Bruker/TOPSPIN/data/guest/nmr/V149HID/3/pdata/1

1D TopSPIN Multiplet Table

| Number | Shift [ppm] | J [Hz]  | M | Connection | Identifier |
|--------|-------------|---------|---|------------|------------|
| 1      | 14.2336     | 74.6354 | 2 | J(1,0)     |            |

1D TopSPIN Multiplet Lines Table

| Number | Position [PPM] |
|--------|----------------|
| 1      | 14.4179        |
| 2      | 14.0493        |

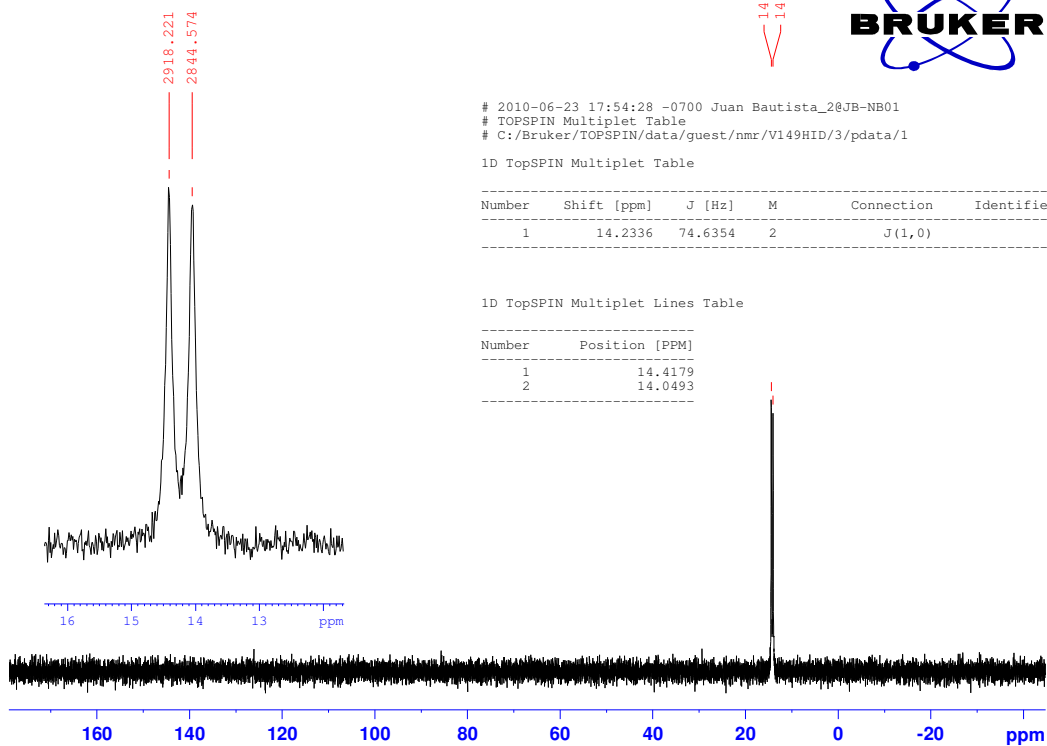<sup>31</sup>P NMR spectrum of compound 42

## PMA 160 - b //CDCI3// 1H NMR F9 (OEt)

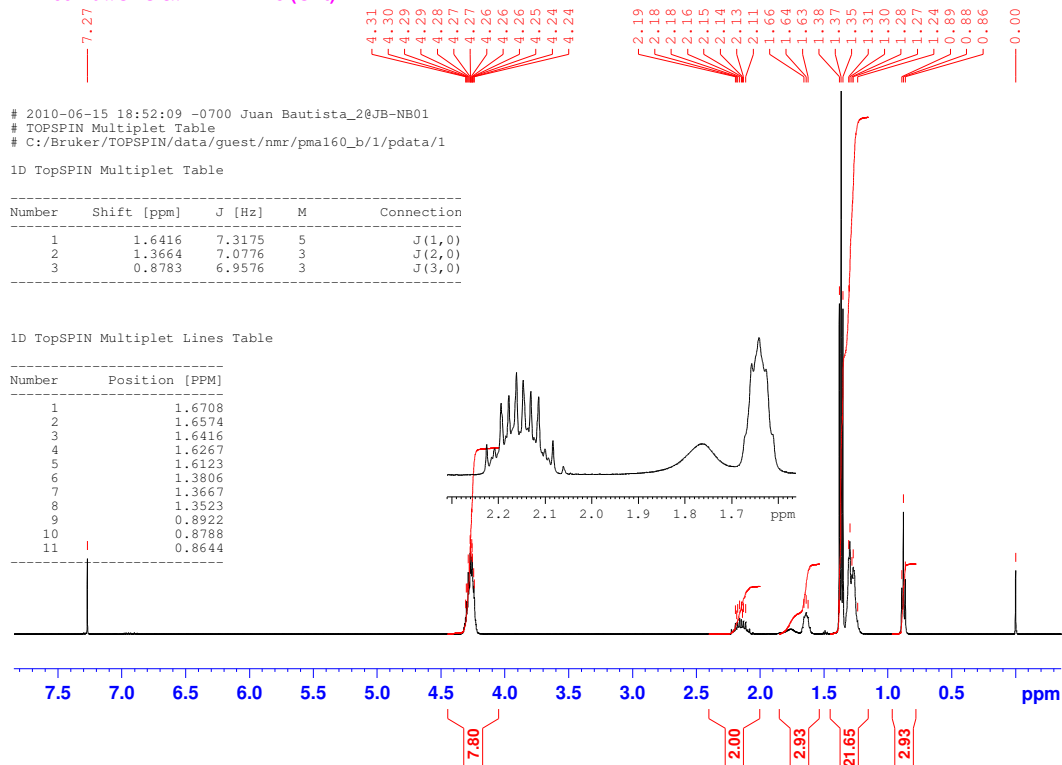<sup>1</sup>H NMR spectrum of compound 33

## PMA160 - b//CDCI3// 13C NMR F9 (OEt)3

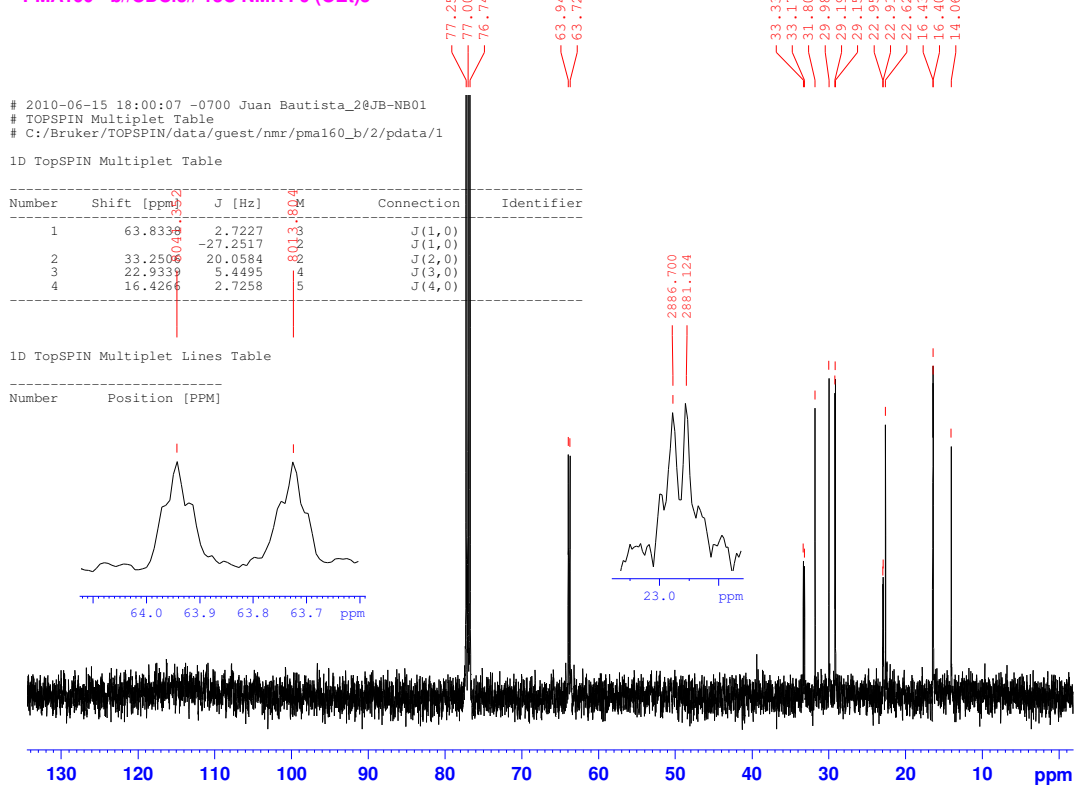<sup>13</sup>C NMR spectrum of compound 33

PMA160 - b //CDCl<sub>3</sub>// 31P NMR

# 2010-06-15 18:41:11 -0700 Juan Bautista\_20JB-NB01  
 # TOPSPIN Multiplet Table  
 # C:/Bruker/TOPSPIN/data/guest/nmr/pma160\_b/3/pdata/

1D TopSPIN Multiplet Table

| Number | Shift [ppm] | J [Hz]  | M | Connect |
|--------|-------------|---------|---|---------|
| 1      | 15.0187     | 74.6354 | 2 | J(1)    |

1D TopSPIN Multiplet Lines Table

| Number | Position [PPM] |
|--------|----------------|
| 1      | 15.2031        |
| 2      | 14.8344        |

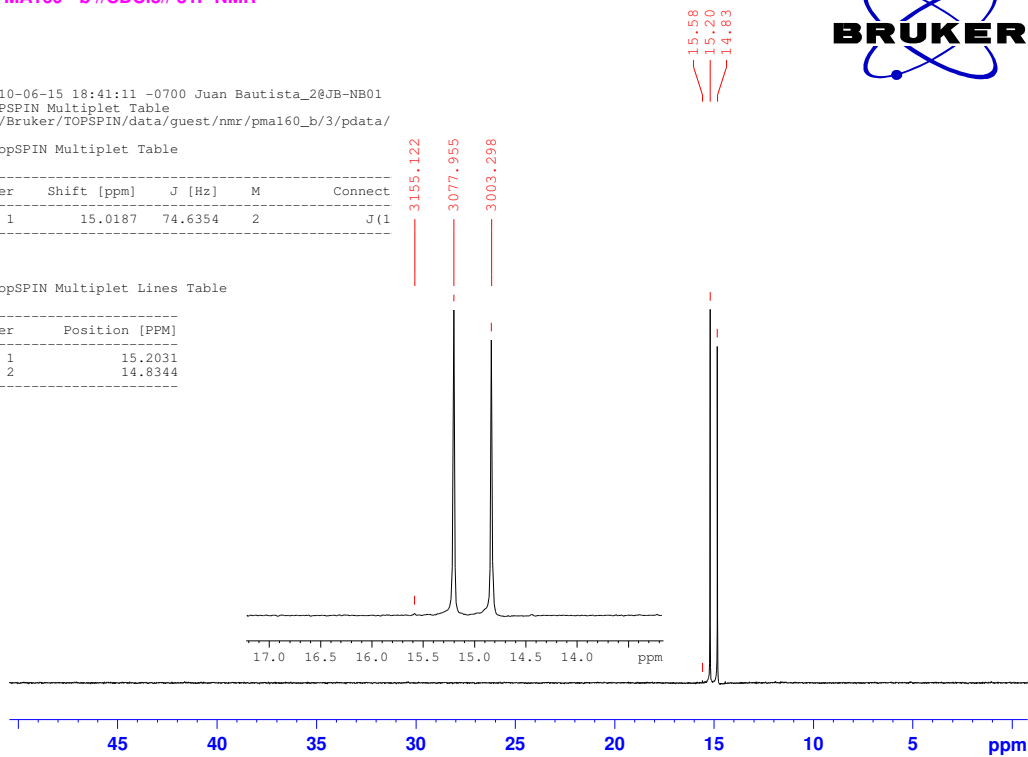<sup>31</sup>P NMR spectrum of compound 33

V153H 1H NMR

+//...//info

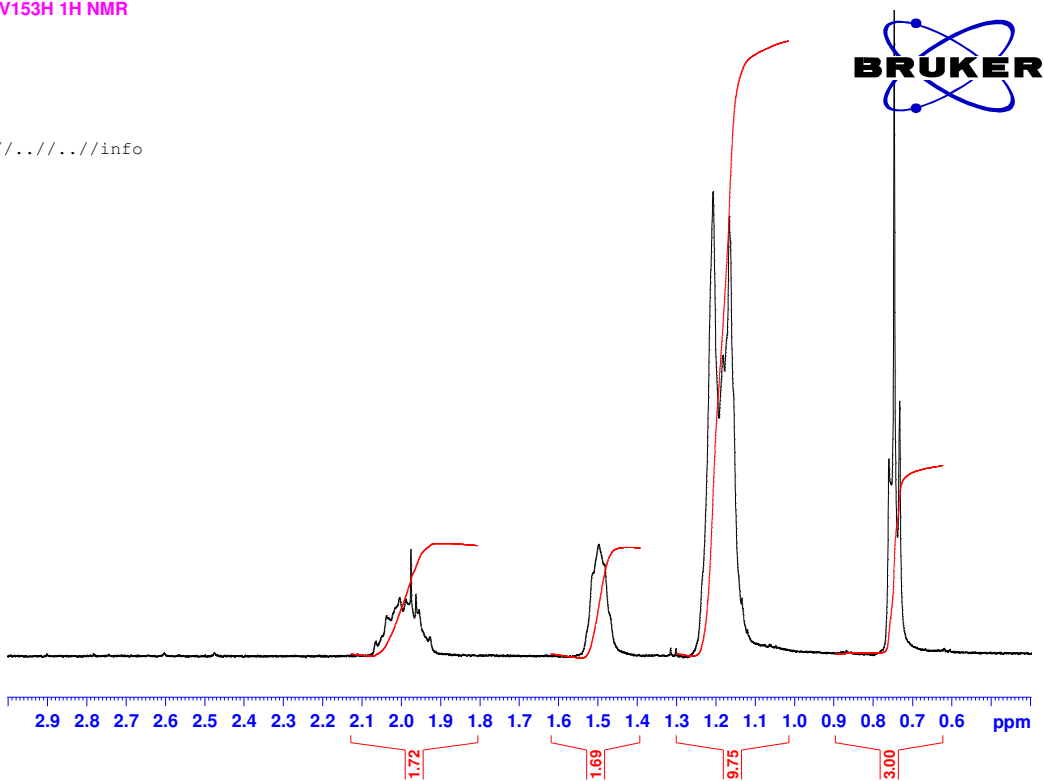<sup>1</sup>H NMR spectrum of compound 43

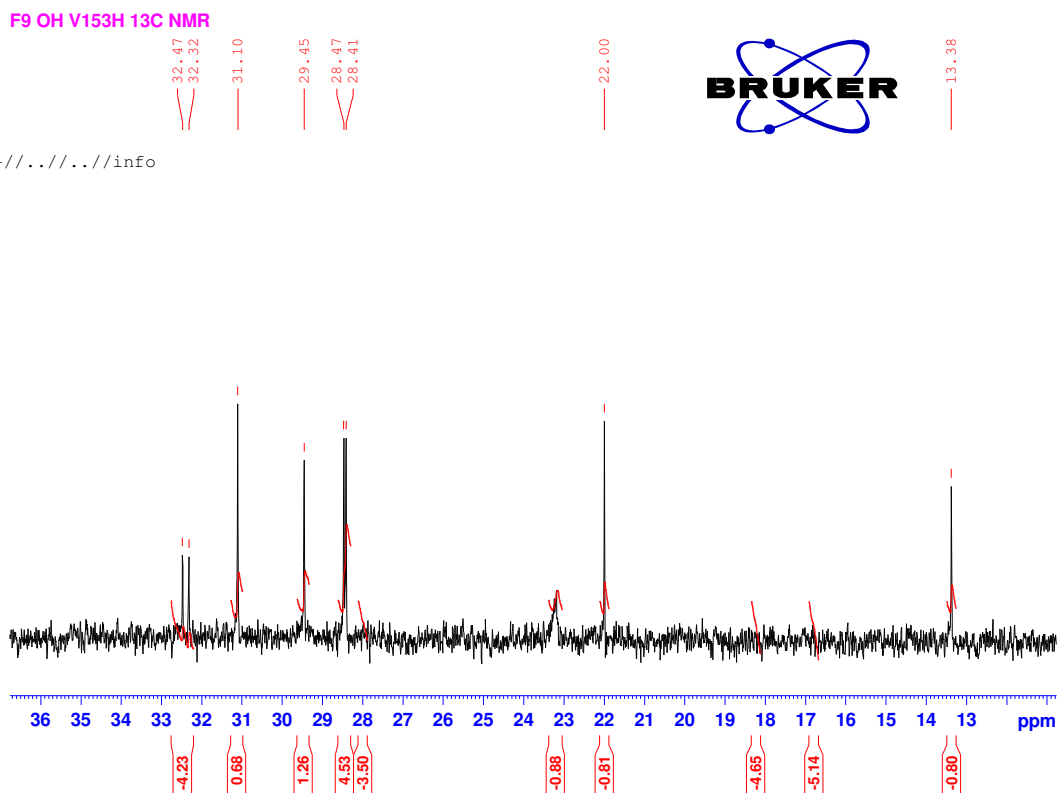**<sup>13</sup>C NMR spectrum of compound 43**

# F9 hid. # //D2O//, 31P\* 20/7/10,

# 2010-09-27 15:27:11 -0700 Juan Bautista\_2@JB-NB01  
 # TOPSPIN Multiplet Table  
 # C:/Bruker/TOPSPIN/data/guest/nmr/V153HID/4/pdata/1

1D TopSPIN Multiplet Table

| Number | Shift [ppm] | J [Hz]  | M | Connection | Identifier |
|--------|-------------|---------|---|------------|------------|
| 1      | 13.9540     | 69.7462 | 2 | J(1,0)     |            |

1D TopSPIN Multiplet Lines Table

| Number | Position [PPM] |
|--------|----------------|
| 1      | 14.1263        |
| 2      | 13.7818        |

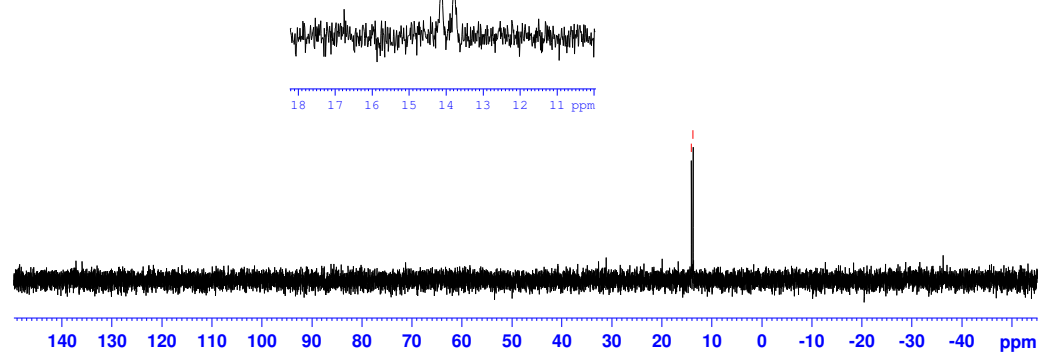**<sup>31</sup>P NMR spectrum of compound 43**

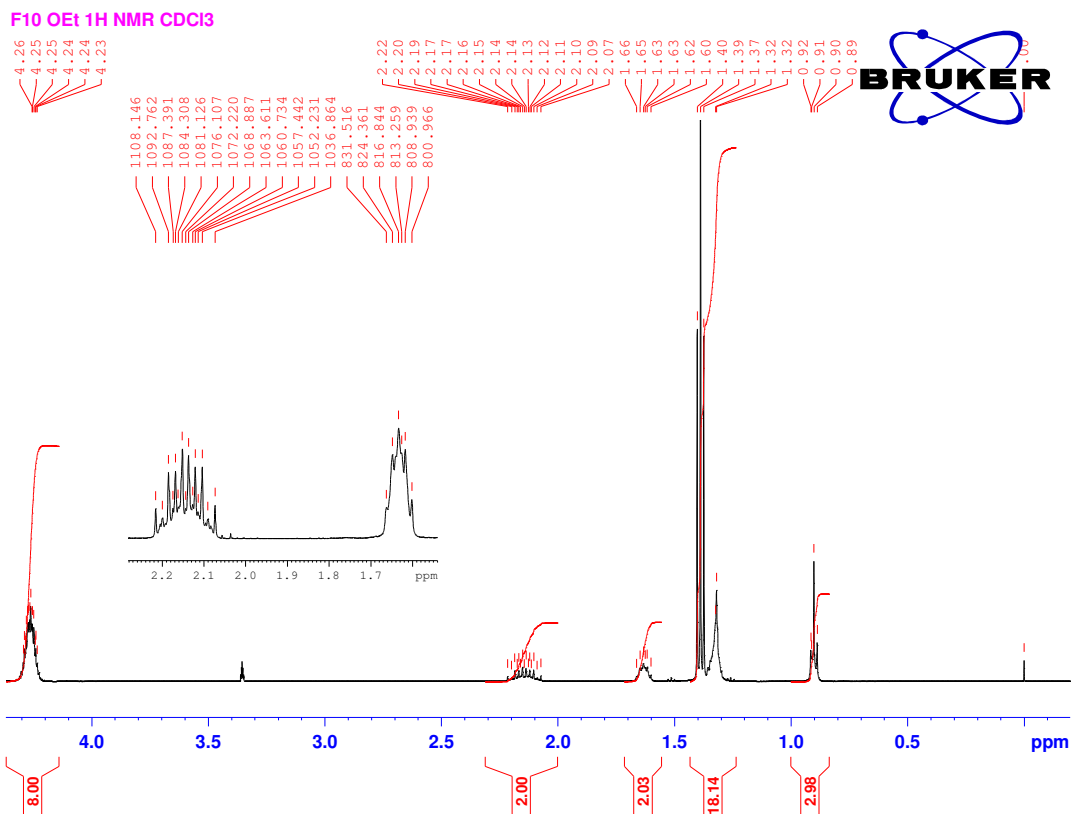<sup>1</sup>H NMR spectrum of compound 34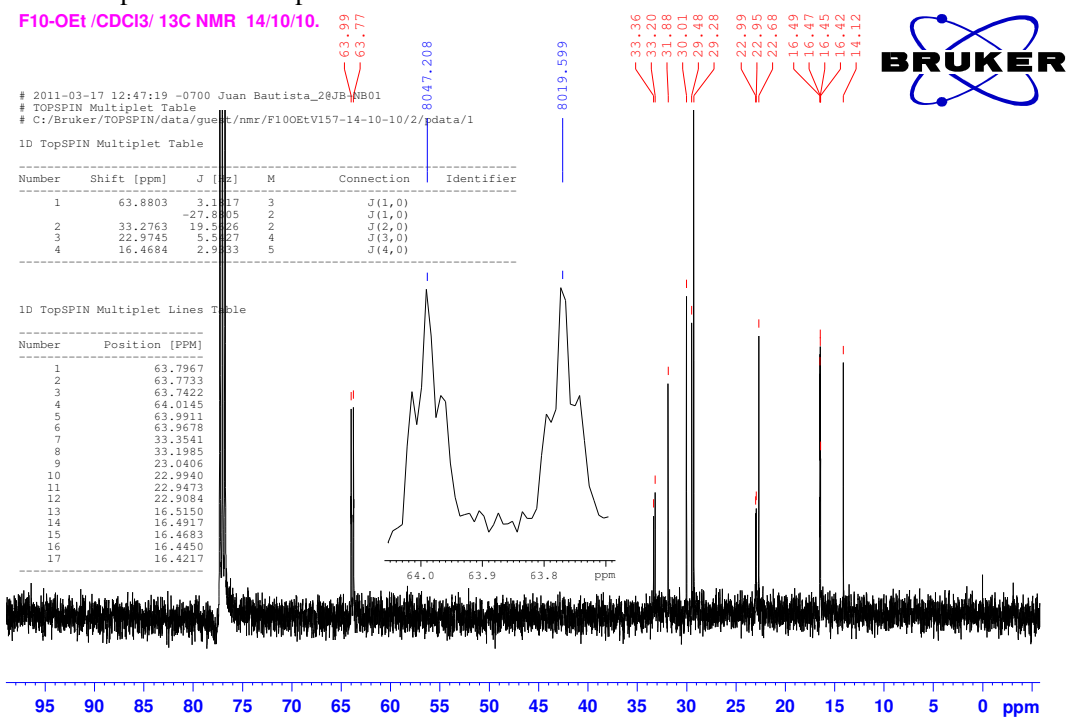<sup>13</sup>C NMR spectrum of compound 34

**<sup>31</sup>P F10 (OEt) CDCl<sub>3</sub>**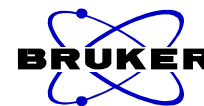

1D TopSPIN Multiplet Table

| Number | Shift [ppm] | J [Hz]  | M | Connection | Identifier |
|--------|-------------|---------|---|------------|------------|
| 1      | 14.7835     | 74.6354 | 2 | J(1,0)     |            |

1D TopSPIN Multiplet Lines Table

| Number | Position [PPM] |
|--------|----------------|
| 1      | 14.9678        |
| 2      | 14.5992        |

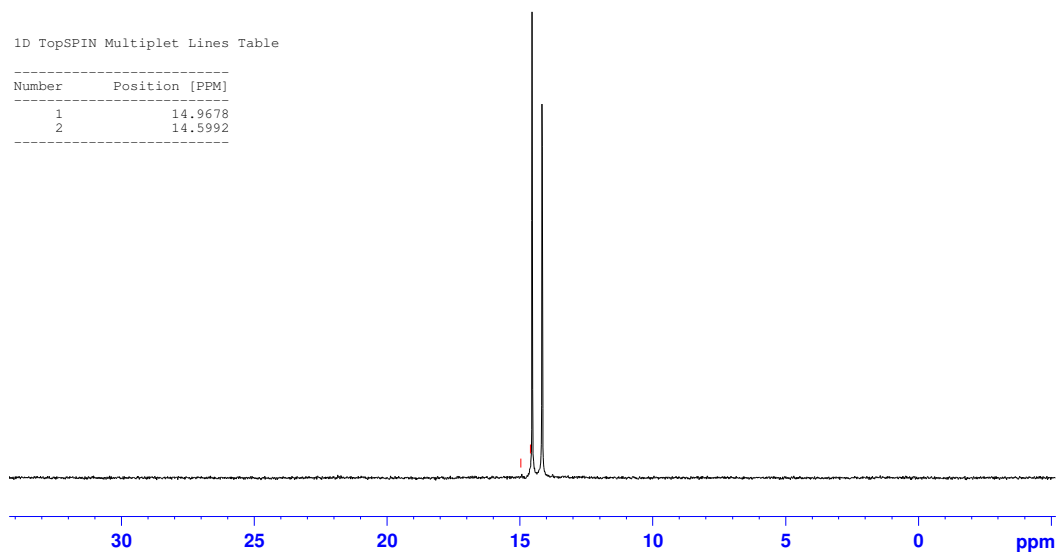**<sup>31</sup>P NMR spectrum of compound 34****F10 OH D2O 1H NMR**

2.00  
1.97  
1.96  
1.93

1.46

1.17  
1.14  
1.13  
1.12

0.72  
0.70  
0.69

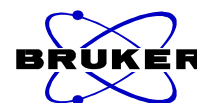

# 2010-09-29 17:33:20 -0700 Juan Bautista\_2@JB-NB01  
# TOPSPIN Multiplet Table  
# C:/Bruker/TOPSPIN/data/guest/nmr/V157HID/1/pdata/1

1D TopSPIN Multiplet Table

| Number | Shift [ppm] | J [Hz] | M | Connection | Identifier |
|--------|-------------|--------|---|------------|------------|
| 1      | 0.7034      | 6.9809 | 3 | J(1,0)     |            |

1D TopSPIN Multiplet Lines Table

| Number | Position [PPM] |
|--------|----------------|
| 1      | 0.7174         |
| 2      | 0.7037         |
| 3      | 0.6895         |

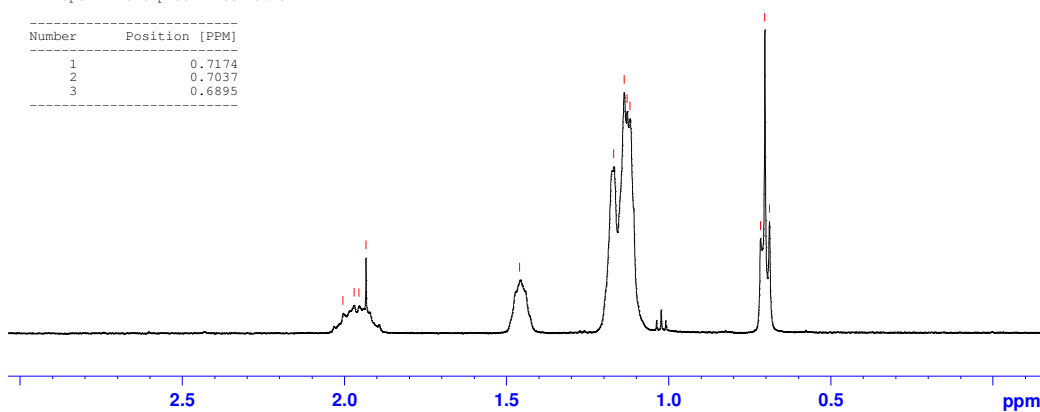**<sup>1</sup>H NMR spectrum of compound 44**

## F10 OH D2O 13C NMR

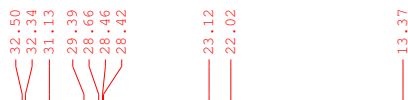

# 2010-09-29 17:47:42 -0700 Juan Bautista\_2@JB-NB01  
# TOPSPIN Multiplet Table  
# C:/Bruker/TOPSPIN/data/guest/nmr/V157HID/3/pdata/1

1D TopSPIN Multiplet Table

| Number | Shift [ppm] | J [Hz]  | M | Connection | Identifier |
|--------|-------------|---------|---|------------|------------|
| 1      | 32.4184     | 19.9817 | 2 | J(1,0)     |            |
| 2      | 23.1378     | 5.4495  | 4 | J(2,0)     |            |

1D TopSPIN Multiplet Lines Table

| Number | Position [PPM] |
|--------|----------------|
| 1      | 32.4979        |
| 2      | 32.3390        |
| 3      | 23.2028        |
| 4      | 23.1667        |
| 5      | 23.1161        |
| 6      | 23.0728        |

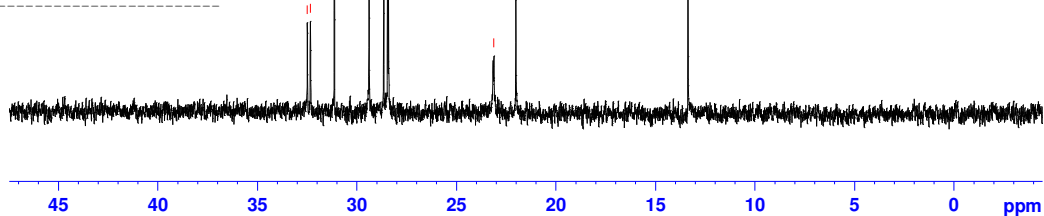<sup>13</sup>C NMR spectrum of compound 44

F10 OH D2O 31P NMR decoupled with 1H "POWGATE"

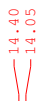

# 2010-09-29 17:54:53 -0700 Juan Bautista\_2@JB-NB01  
# TOPSPIN Multiplet Table  
# C:/Bruker/TOPSPIN/data/guest/nmr/V157HID/2/pdata/1

1D TopSPIN Multiplet Table

| Number | Shift [ppm] | J [Hz]  | M | Connection | Identifier |
|--------|-------------|---------|---|------------|------------|
| 1      | 14.2268     | 71.6229 | 2 | J(1,0)     |            |

1D TopSPIN Multiplet Lines Table

| Number | Position [PPM] |
|--------|----------------|
| 1      | 14.4037        |
| 2      | 14.0500        |

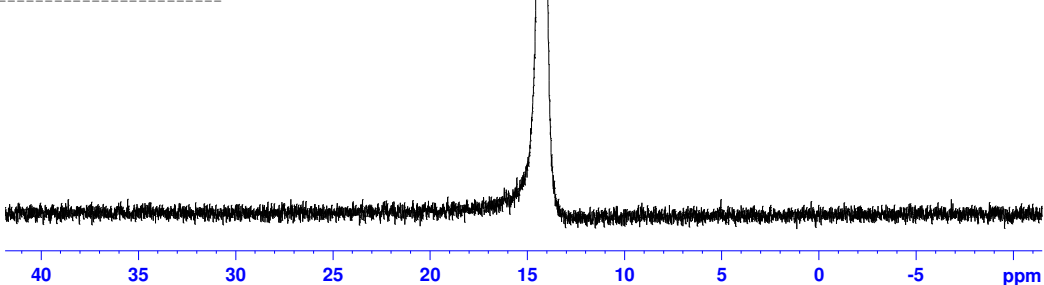<sup>31</sup>P NMR spectrum of compound 44

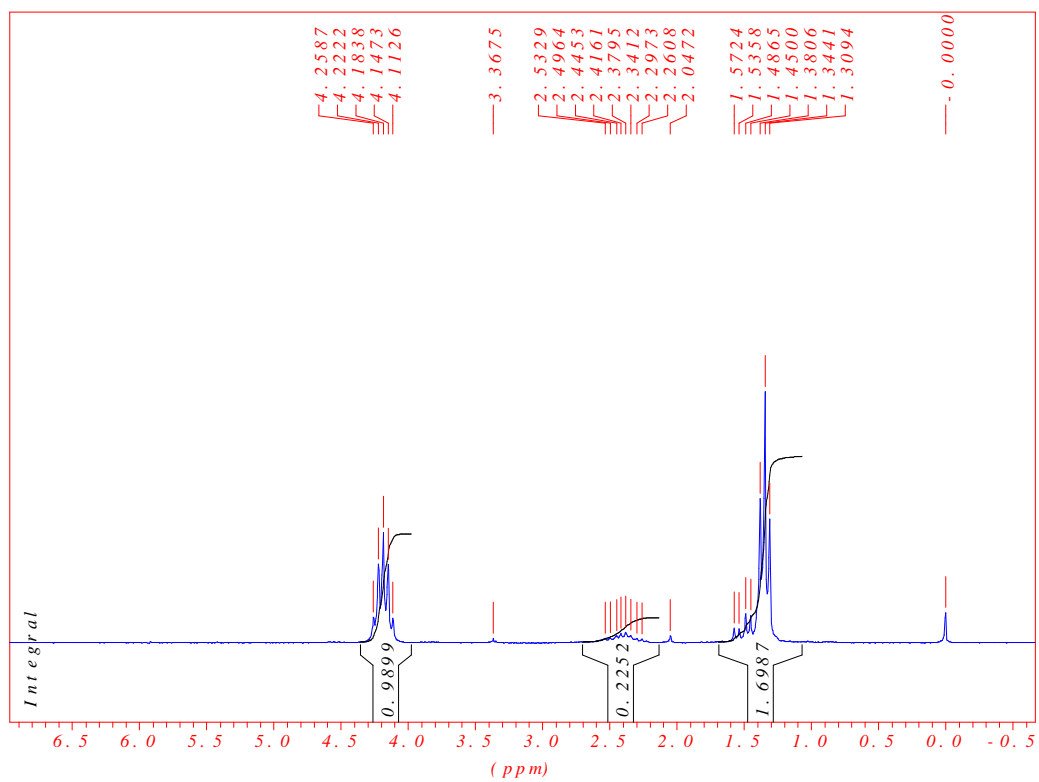

<sup>1</sup>H NMR Spectrum of compound **16**

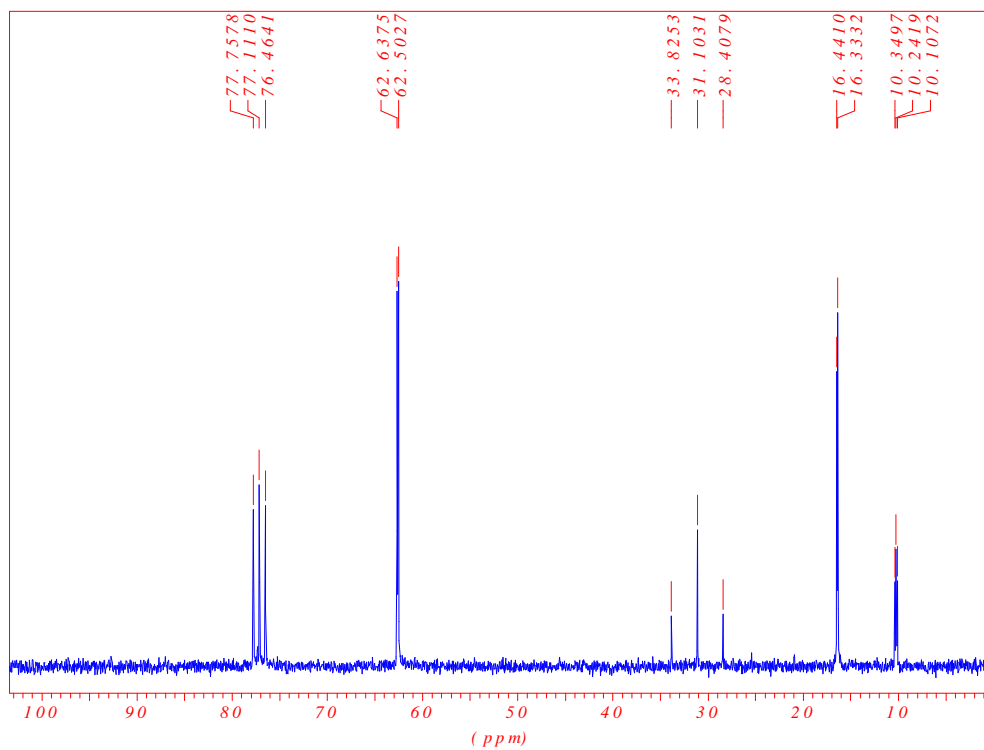

<sup>13</sup>C NMR Spectrum of compound **16**



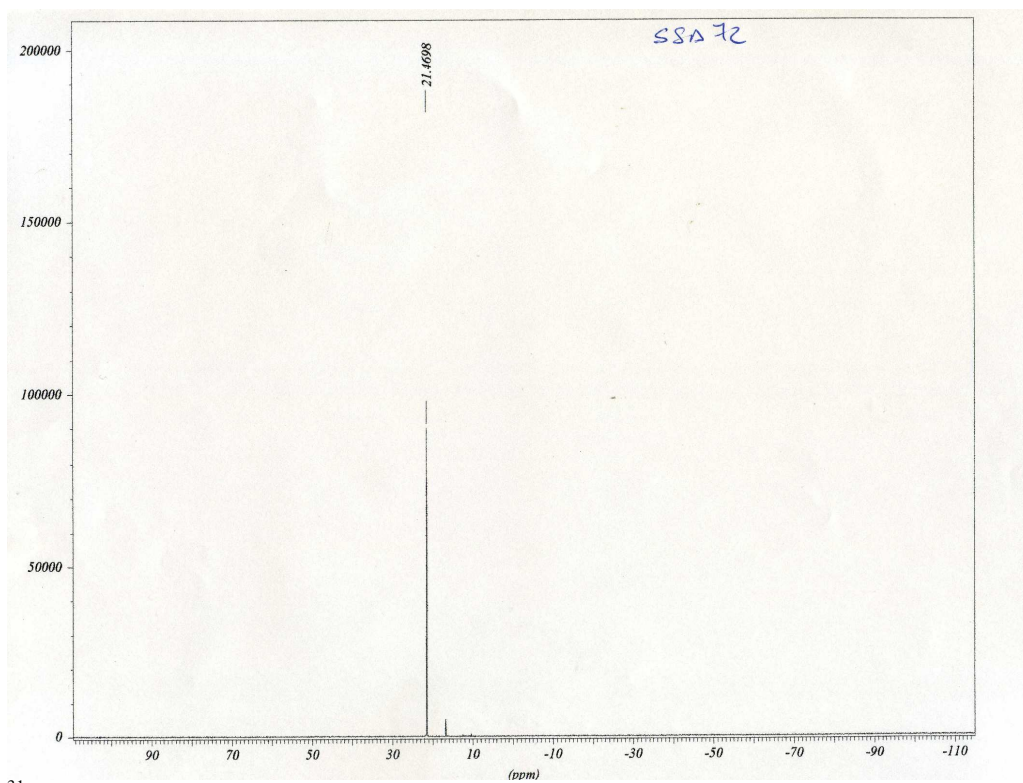 $^{31}\text{P}$  NMR spectrum of compound **16**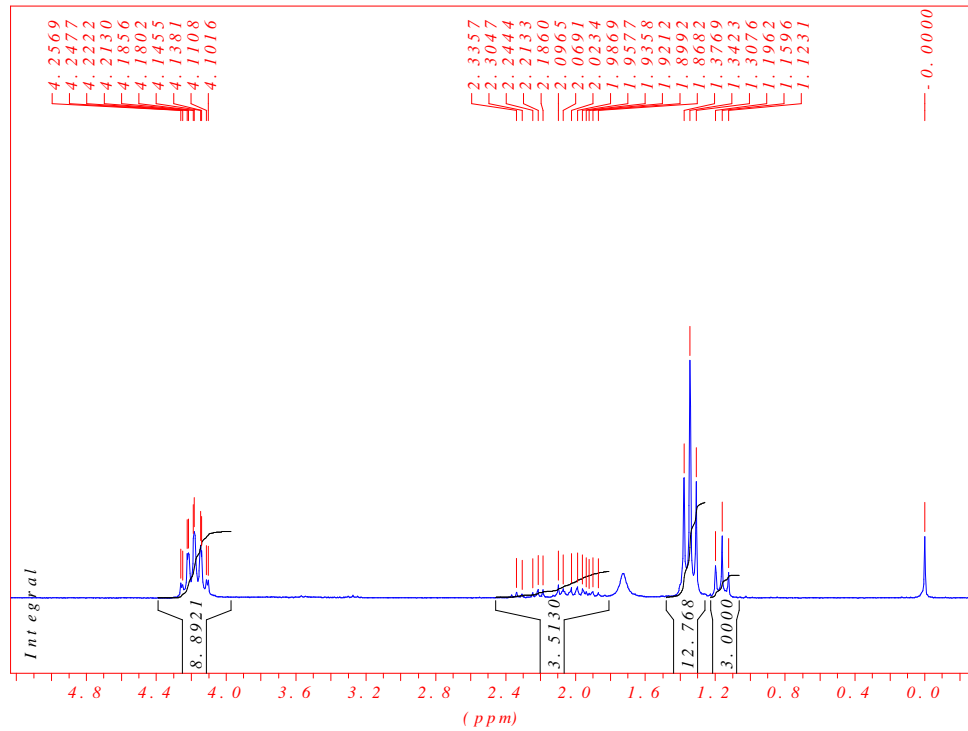 $^1\text{H}$  NMR Spectrum of compound **17**

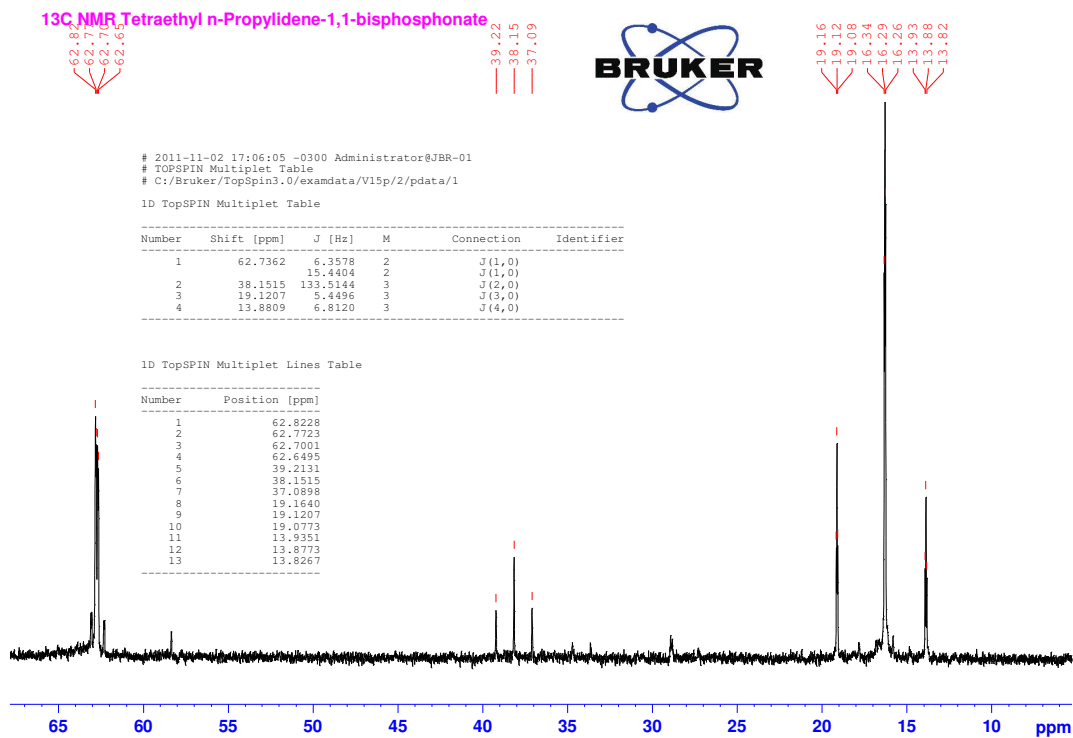

<sup>13</sup>C NMR Spectrum of compound 17

**<sup>31</sup>P NMR Tetraethyl n-Propylidene-1,1-bisphosphonate**

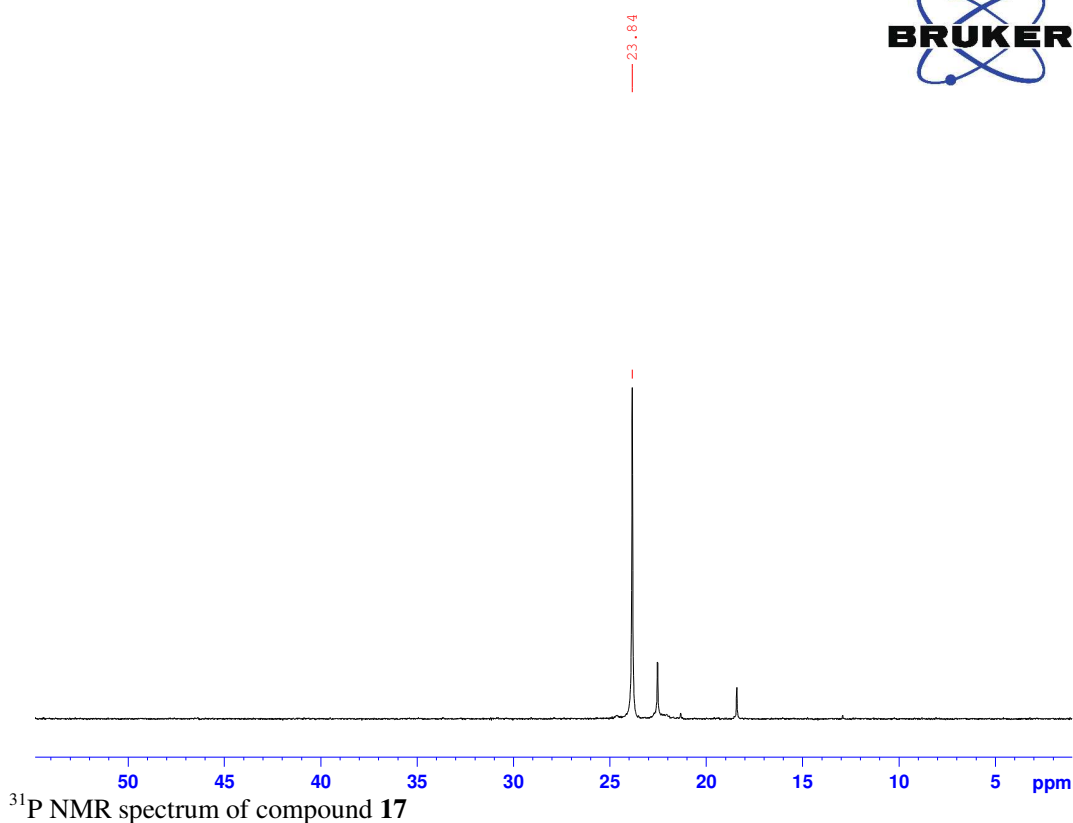

<sup>31</sup>P NMR spectrum of compound 17

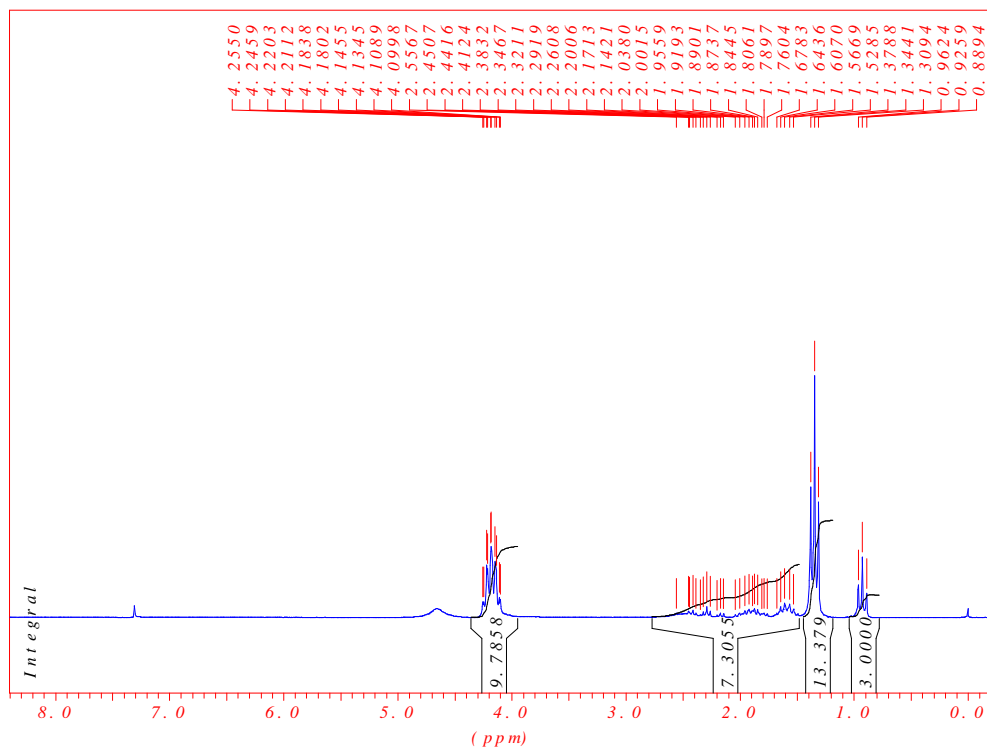<sup>1</sup>H NMR Spectrum of compound **18**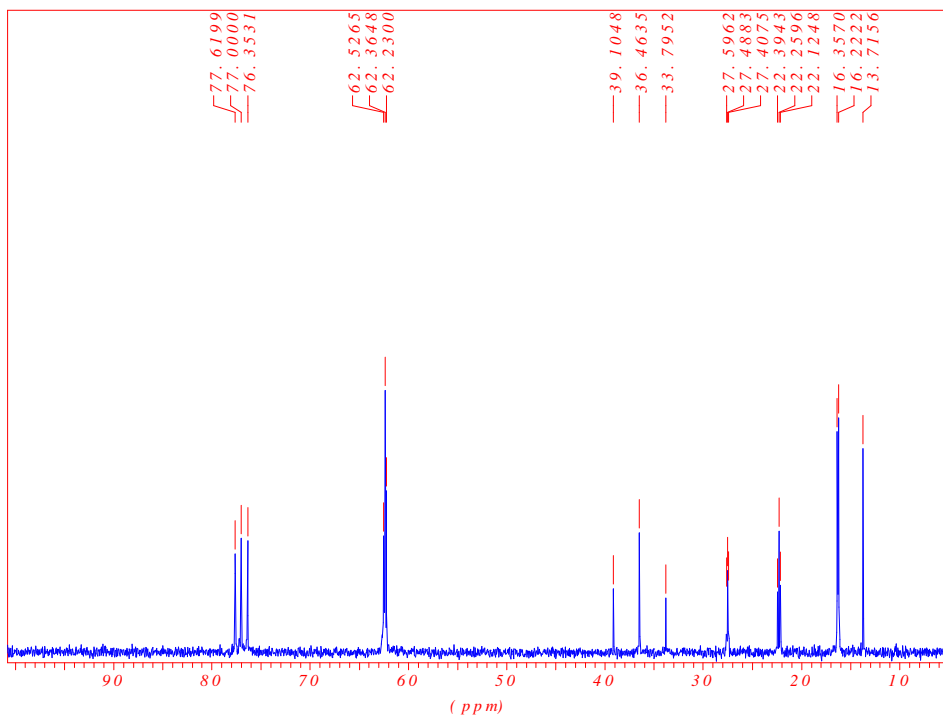<sup>13</sup>C NMR Spectrum of compound **18**

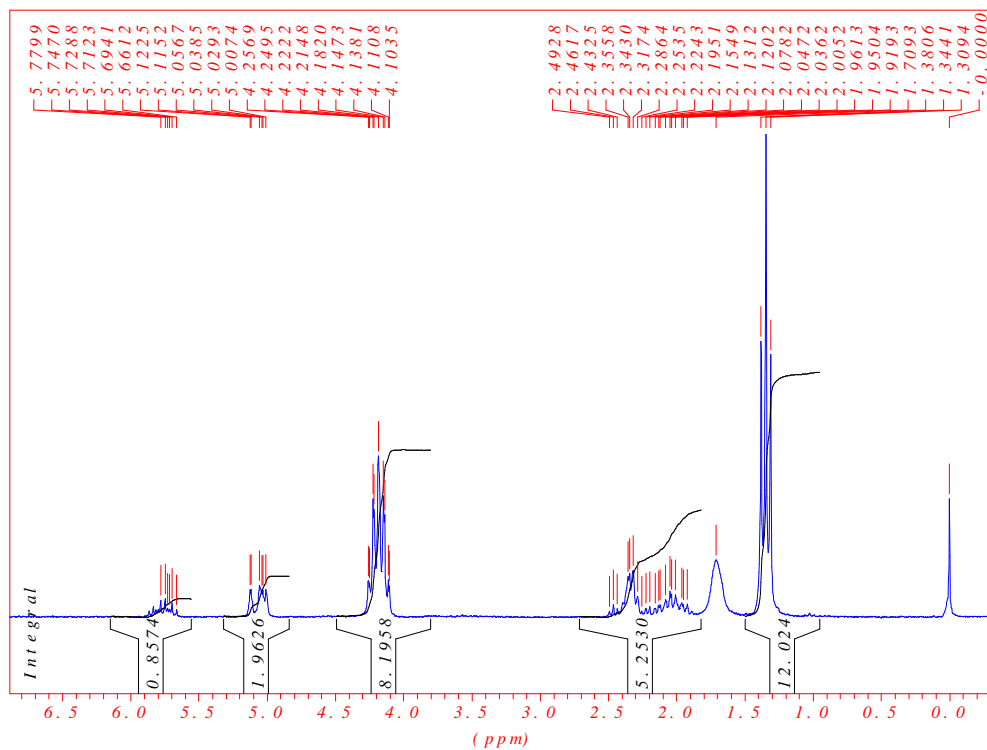

<sup>1</sup>H NMR Spectrum of compound **19**

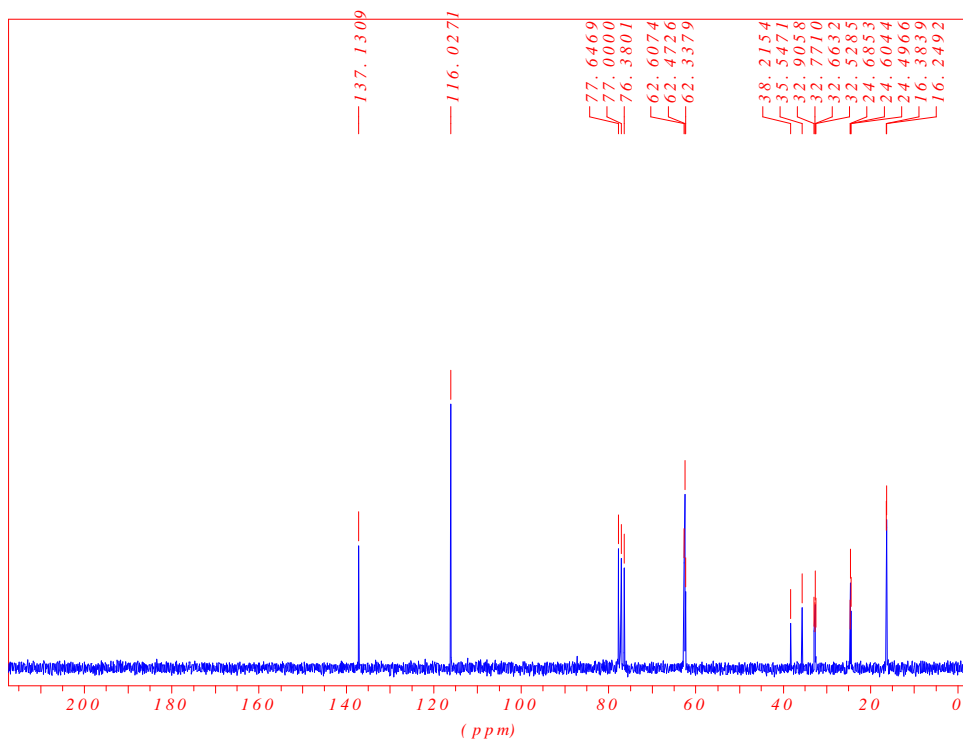

<sup>13</sup>C NMR Spectrum of compound **19**

**<sup>1</sup>H NMR Tetraethyl n-Pentylidene-1,1-bisphosphonate**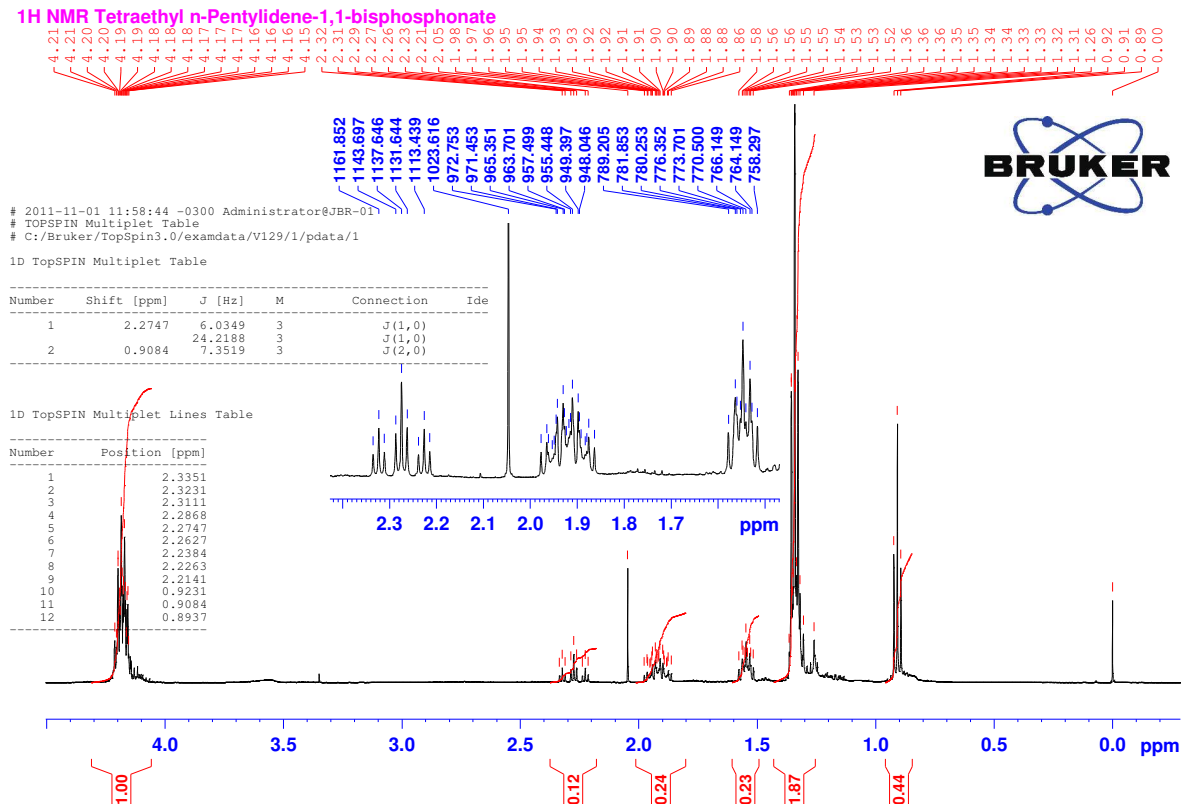<sup>1</sup>H NMR spectrum of compound 20**<sup>13</sup>C NMR Tetraethyl n-Pentylidene-1,1-bisphosphonate**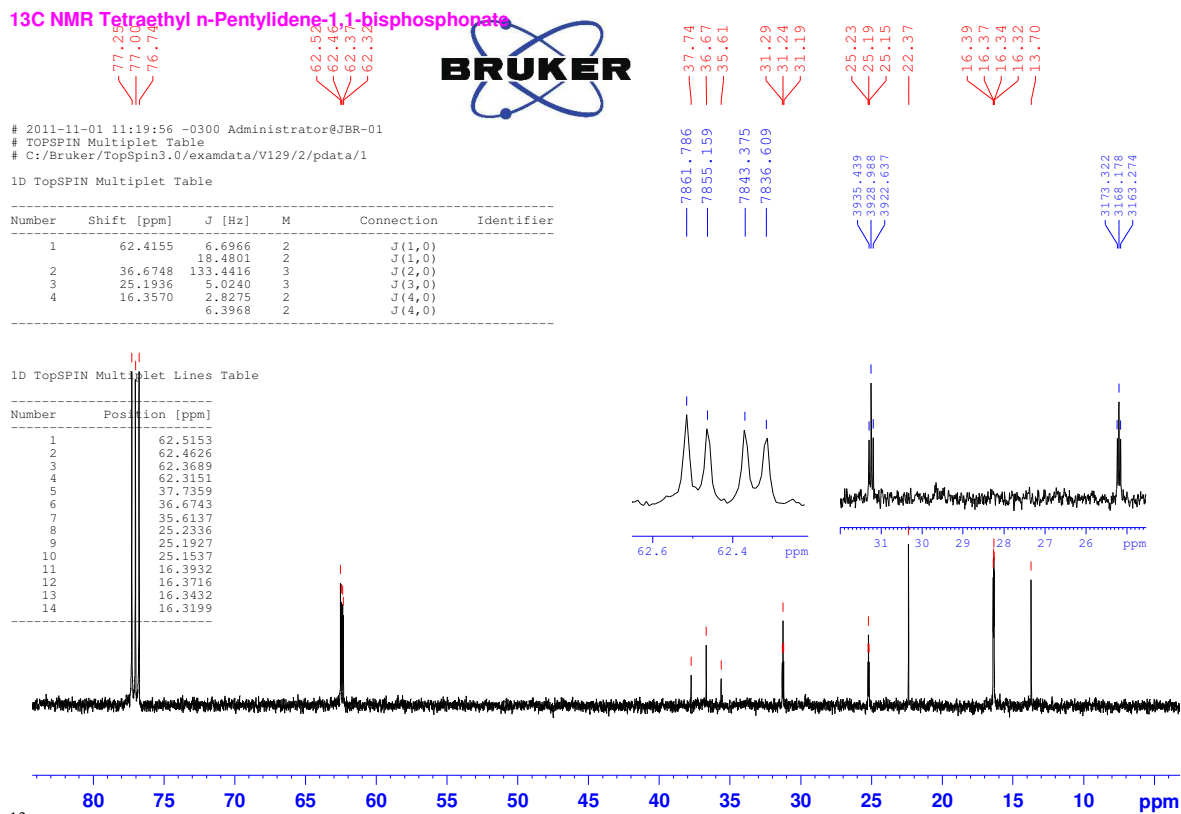<sup>13</sup>C NMR spectrum of compound 20

**<sup>31</sup>P NMR Tetraethyl n-Pentylidene-1,1-bisphosphonate**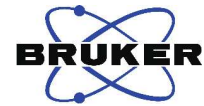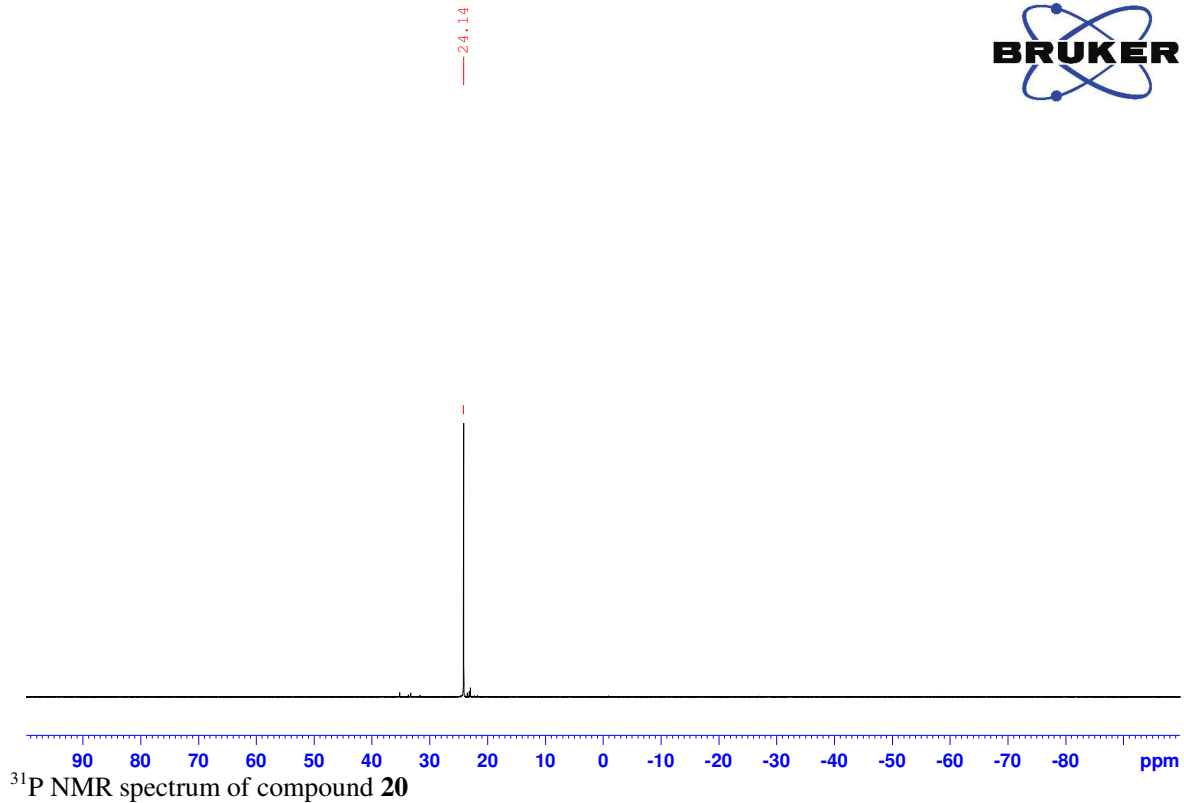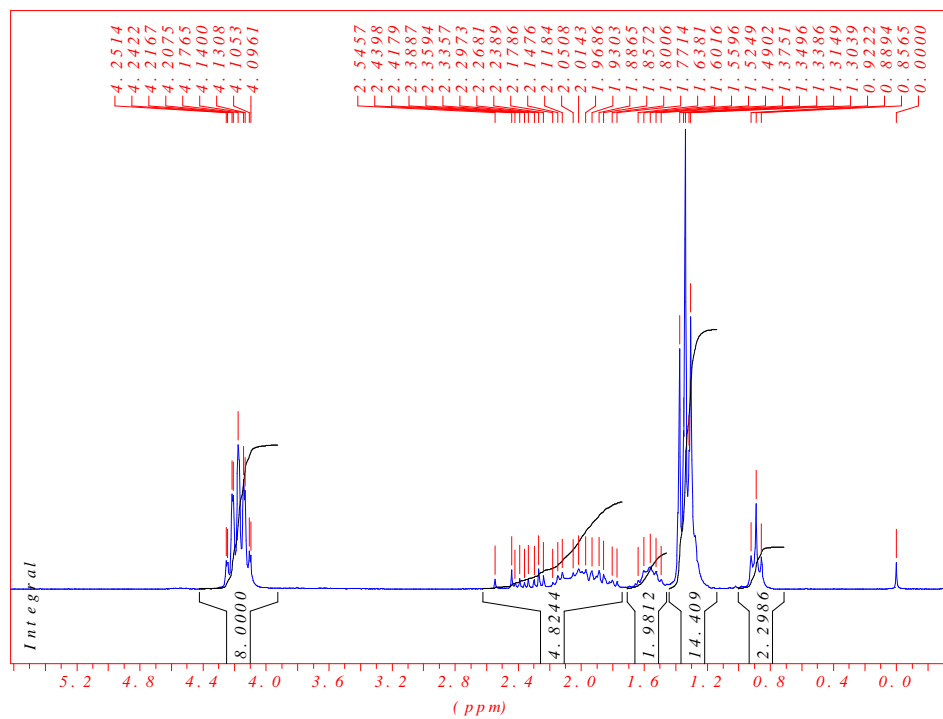**<sup>1</sup>H NMR Spectrum of compound 21**

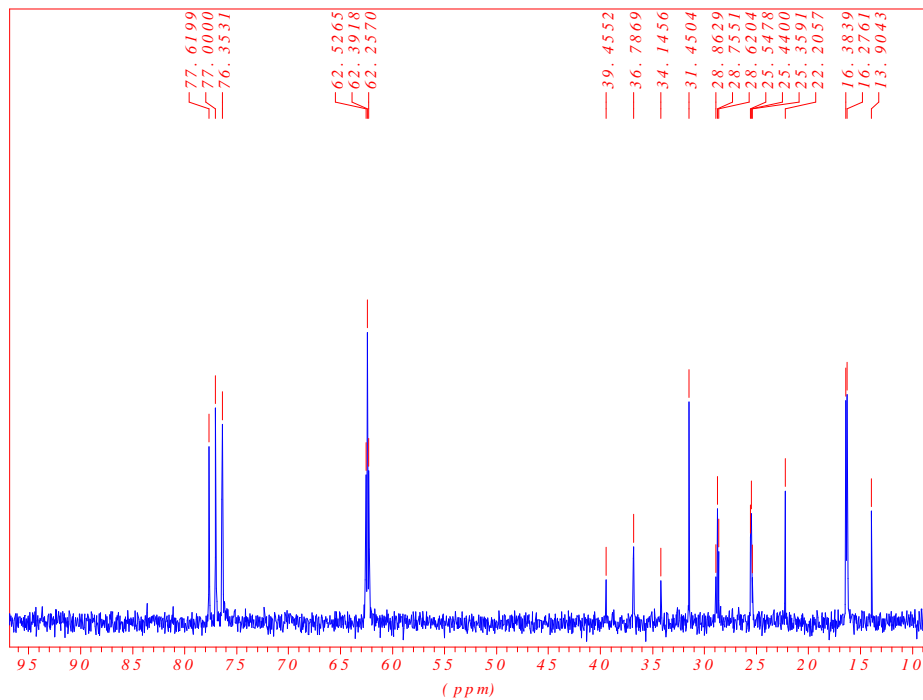<sup>13</sup>C NMR Spectrum of compound 21V 135, #4 /CDCl<sub>3</sub>/ <sup>1</sup>H NMR Tetraethyl n-Heptylidene-1,1-bisphosphonate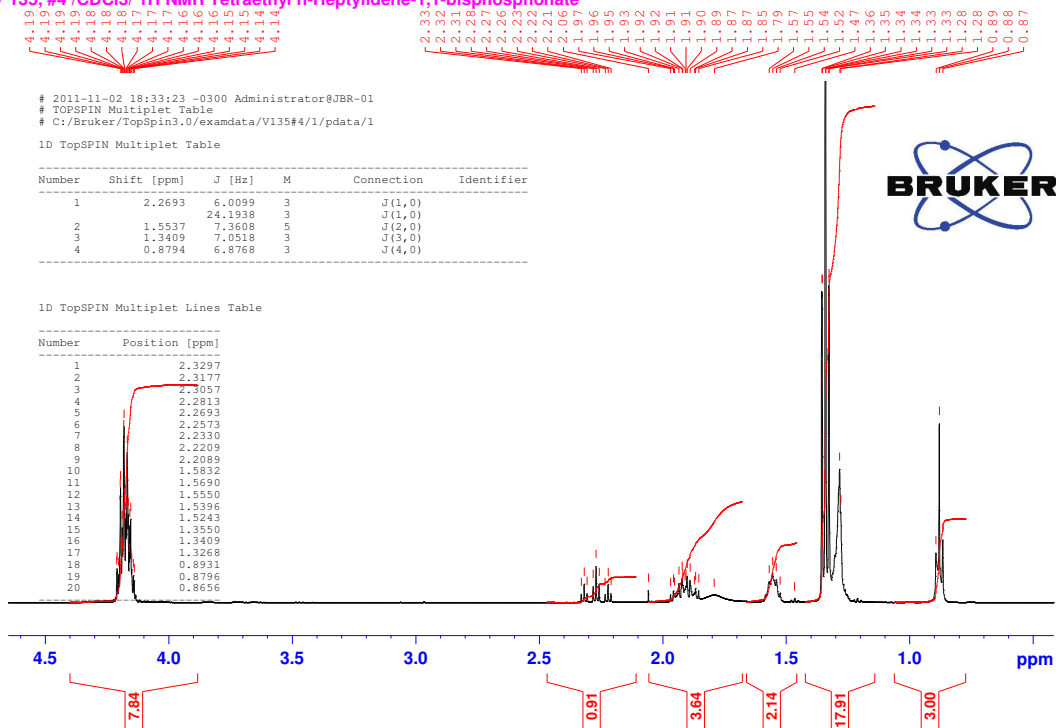<sup>1</sup>H NMR spectrum of compound 22

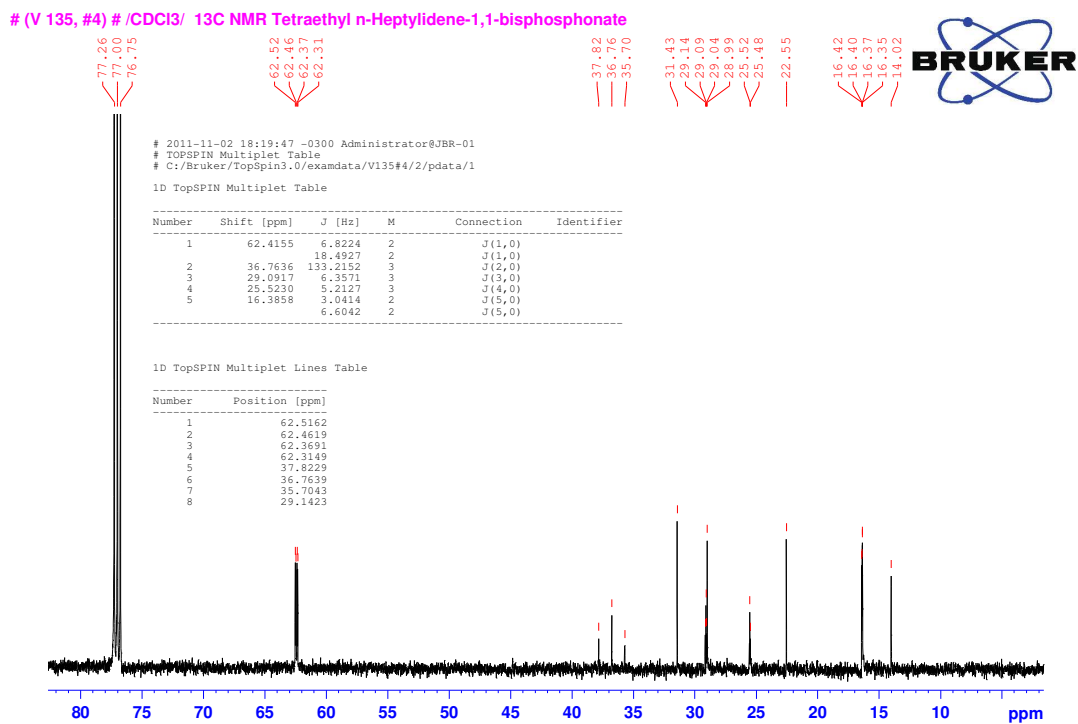<sup>13</sup>C NMR spectrum of compound 22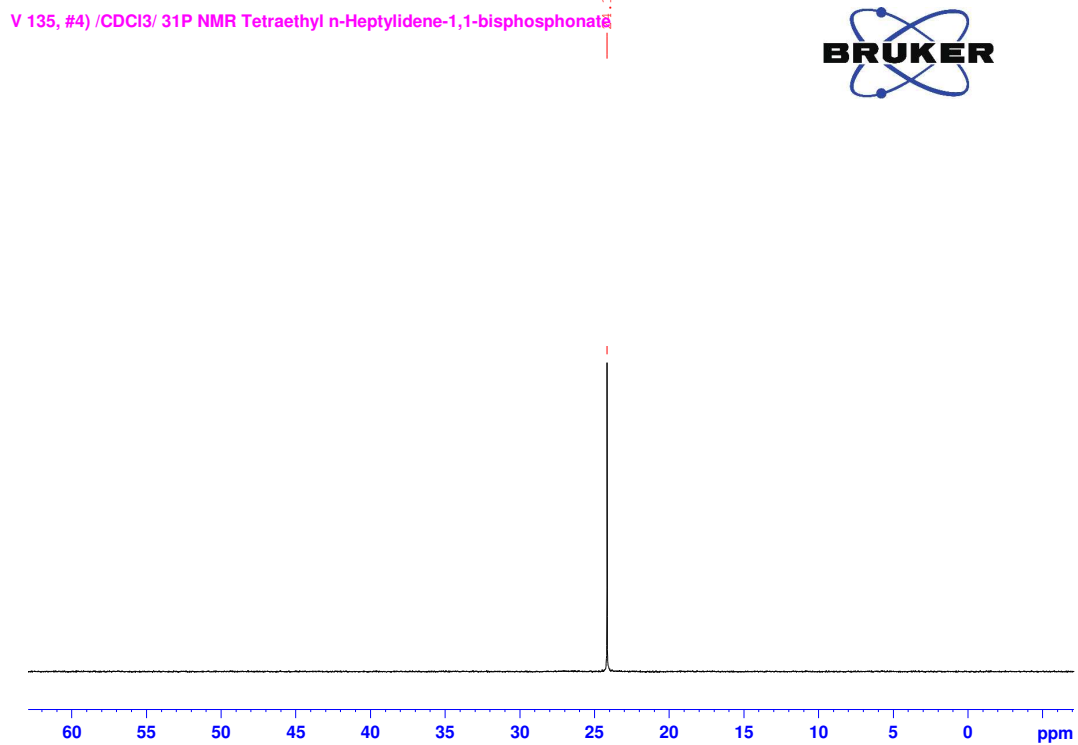<sup>31</sup>P NMR spectrum of compound 22



## V 148 #2 /CDCI3/ 1H NMR Tetraethyl n-Octylidene-1,1-bisphosphonate

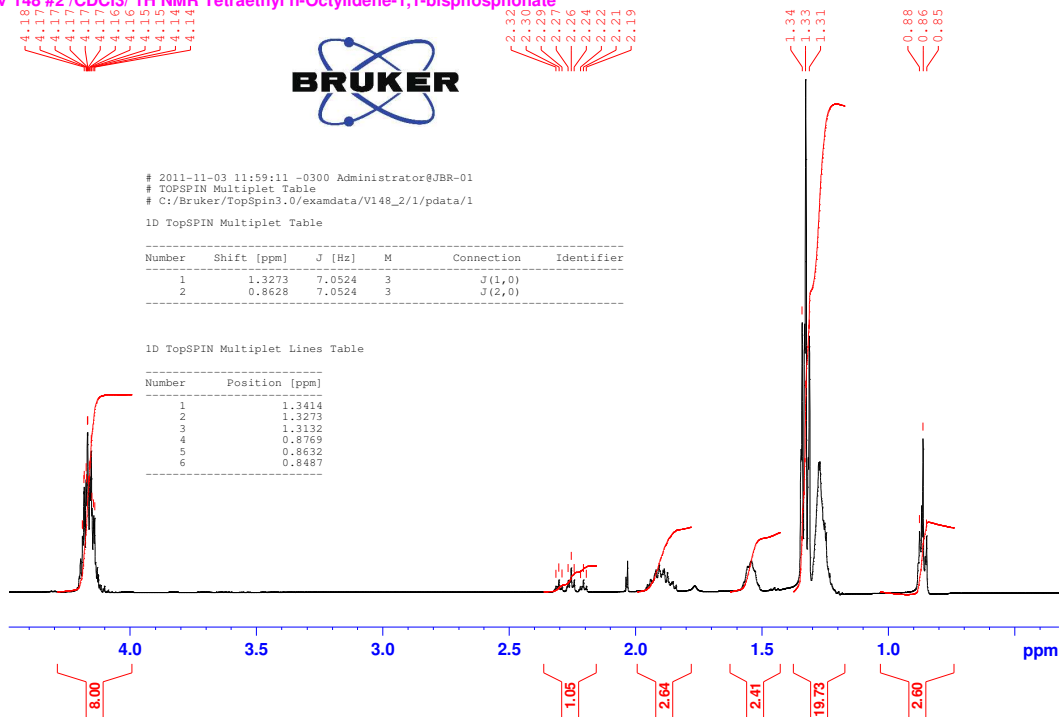

## V 148 #2 /CDCI3/ 13C NMR Tetraethyl n-Octylidene-1,1-bisphosphonate

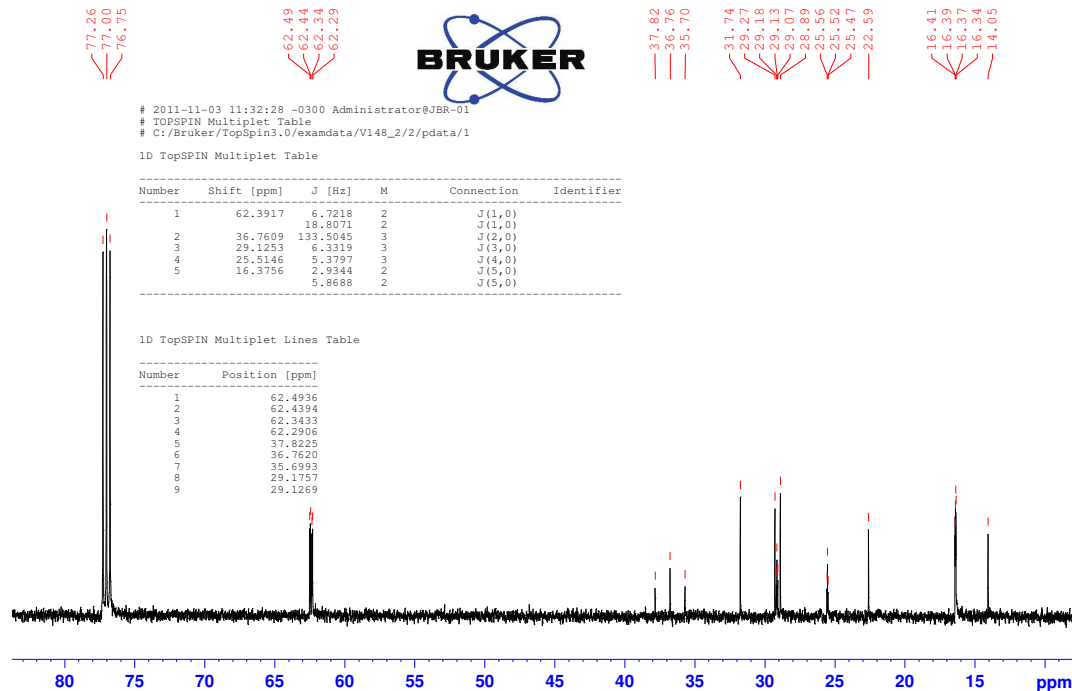

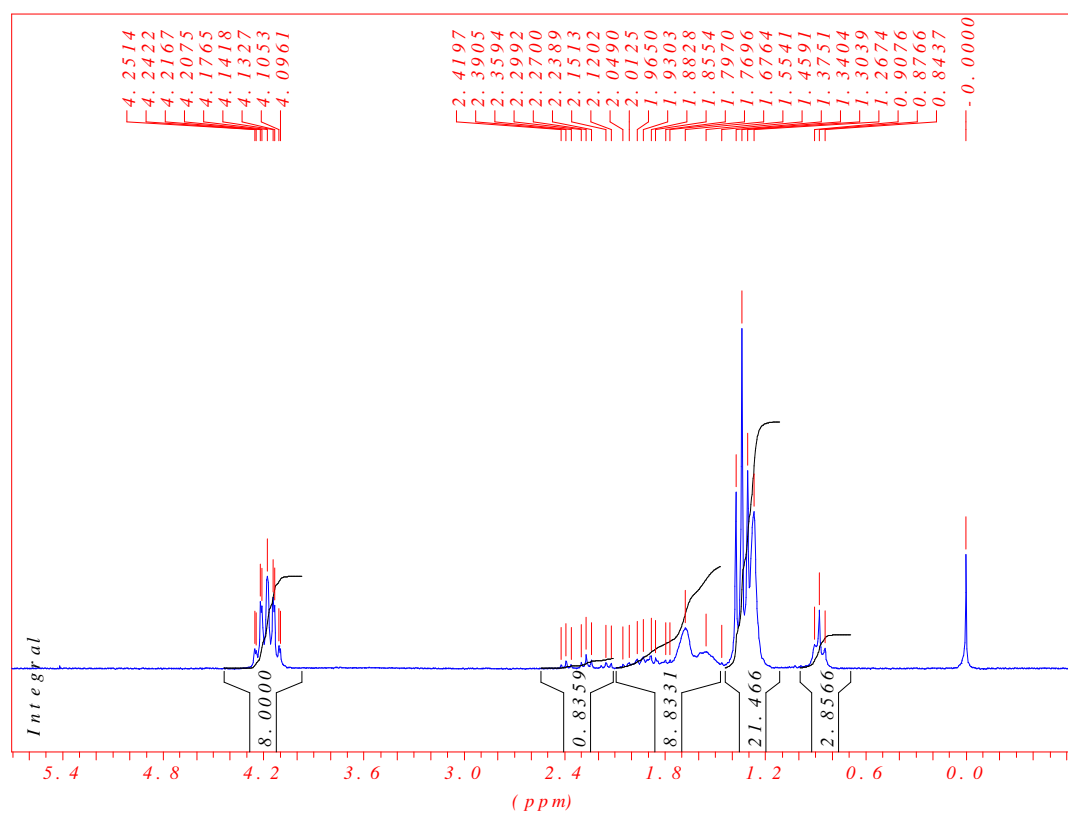

<sup>1</sup>H NMR Spectrum of compound 24

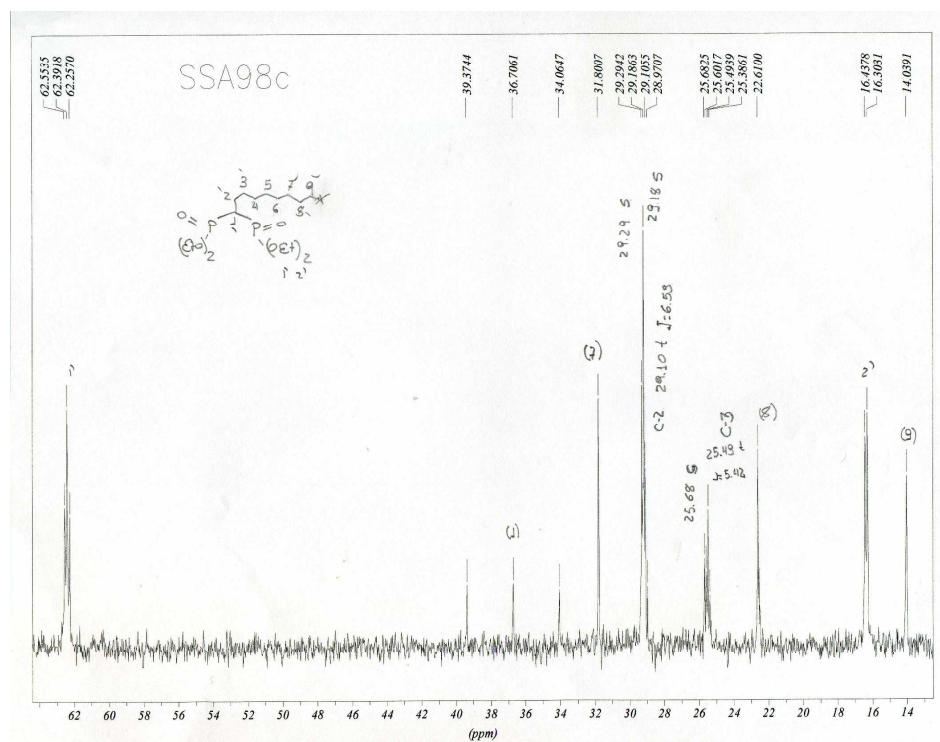

<sup>13</sup>C NMR spectrum of compound 24

Sample No. 55A89 Company / School Dr. Juan B. Rodriguez SUBMITTER  
 Address FACULTAD DE CIENCIAS EXACTAS Y NATURALES  
DEPARTAMENTO DE QUIMICA ORGANICA  
PABELLON 1, CIUDAD UNIVERSITARIA  
1400 BUENOS AIRES ARGENTINA

P.O. Box 2288  
 Norcross, Georgia 30091  
 (770) 242-0082

NO CHARGE FOR DUPLICATES

PROFESSOR/SUPERVISOR: NAME SEP 24, 2001 DATE

| Element | Theory | Found                                         |       |
|---------|--------|-----------------------------------------------|-------|
| C       | 46.52  | 45.05                                         | 44.97 |
| H       | 9.00   | 8.69                                          | 8.71  |
| P       | 17.25  | OUR LAB DOES NOT PERFORM PHOSPHORUS ANALYSIS. |       |

Single  Duplicate   
 Elements C, H, O, P  
 Present: Analyze for C, H, P  
 Hydroscopic  Explosive   
 M.P.            B.P.             
 To be dried: Yes  No   
 Temp.            Vac.            Time 3 h  
 FAX Service  5411 4804-1692  
 Fax Phone # 5411 4804-1692  
 Rush Service  (SEE CURRENT PRICE LIST)  
 Phone Service  (SEE CURRENT PRICE LIST)  
 Phone No.           

Date Received SEP 26 2001 Date Completed SEP 26 2001

Anal. Compd 21

Sample No. 55A87 Company / School Dr. Juan B. Rodriguez SUBMITTER  
 Address FACULTAD DE CIENCIAS EXACTAS Y NATURALES  
DEPARTAMENTO DE QUIMICA ORGANICA  
PABELLON 1, CIUDAD UNIVERSITARIA  
1400 BUENOS AIRES ARGENTINA

P.O. Box 2288  
 Norcross, Georgia 30091  
 (770) 242-0082

NO CHARGE FOR DUPLICATES

PROFESSOR/SUPERVISOR: NAME SEP 24, 2001 DATE

| Element | Theory | Found                                         |       |
|---------|--------|-----------------------------------------------|-------|
| C       | 48.38  | 47.41                                         | 47.49 |
| H       | 9.20   | 9.13                                          | 9.27  |
| P       | 16.64  | OUR LAB DOES NOT PERFORM PHOSPHORUS ANALYSIS. |       |

Single  Duplicate   
 Elements C, H, O, P  
 Present: Analyze for C, H, P  
 Hydroscopic  Explosive   
 M.P.            B.P.             
 To be dried: Yes  No   
 Temp.            Vac.            Time 3 h  
 FAX Service  5411 4804-1692  
 Fax Phone # 5411 4804-1692  
 Rush Service  (SEE CURRENT PRICE LIST)  
 Phone Service  (SEE CURRENT PRICE LIST)  
 Phone No.           

Date Received SEP 26 2001 Date Completed SEP 26 2001

Anal. Compound 22.

Sample No. 55A86 Company / School Dr. Juan B. Rodriguez SUBMITTER  
 Address FACULTAD DE CIENCIAS EXACTAS Y NATURALES  
DEPARTAMENTO DE QUIMICA ORGANICA  
PABELLON 1, CIUDAD UNIVERSITARIA  
1400 BUENOS AIRES ARGENTINA

P.O. Box 2288  
 Norcross, Georgia 30091  
 (770) 242-0082

NO CHARGE FOR DUPLICATES

PROFESSOR/SUPERVISOR: NAME SEP 24, 2001 DATE

| Element | Theory | Found                                               |       |
|---------|--------|-----------------------------------------------------|-------|
| C       | 49.73  | 49.26                                               | 49.21 |
| H       | 9.39   | 9.68                                                | 9.61  |
| P       | 16.03  | NOTE: OUR LAB DOES NOT PERFORM PHOSPHORUS ANALYSIS. |       |

Single  Duplicate   
 Elements C, H, O, P  
 Present: Analyze for C, H, P  
 Hydroscopic  Explosive   
 M.P.            B.P.             
 To be dried: Yes  No   
 Temp.            Vac.            Time             
 FAX Service  5411 4804-1692  
 Fax Phone # 5411 4804-1692  
 Rush Service  (SEE CURRENT PRICE LIST)  
 Phone Service  (SEE CURRENT PRICE LIST)  
 Phone No.           

Date Received SEP 26 2001 Date Completed SEP 26 2001

Anal. Compound 23.
